# Supplementary material for: Iridium/graphene nanostructured catalyst for the N-alkylation of amines to synthesize nitrogen-containing derivatives and heterocyclic compounds in a green process
Source: Royal Society of Chemistry journal article supplement (doi:10.1039/d1ra09052f), 2022-01-01
Supplement: d1ra09052f1.pdf [file d1ra09052f1.pdf]

## Supporting Information

# Iridium/Graphene Nanostructured Catalyst for the N- Alkylation of Amines to Synthesize Nitrogen-containing Derivatives and Heterocyclic Compounds in Green Process

Tsun-Ren Chen,<sup>\*</sup> Yu-Tung Chen, Yi-Sheng Chen, Wen-Jen Lee, Yen-Hsing  
Lin, and Hao-Chen Wang

Department of Applied Chemistry, National Pingtung University, Pingtung,  
Taiwan, 90003

## I. Characterization of the Catalyzed Products.

*N*-benzylaniline (**1a**). It was obtained as yellow oil, yield 92 % (169 mg);  $^1\text{H}$  NMR ( $\text{CDCl}_3$ , 600MHz)  $\delta$  (ppm) = 7.37-7.32 (m, Ar, 4H), 7.27-7.24 (m, Ar, 1H), 7.18-7.15 (m, Ar, 2H), 6.72-6.69 (t, Ar, 1H), 6.64-6.62 (d, Ar, 2H, JHH = 7.8Hz), 4.32 (s, CH<sub>2</sub>, 2H), 4.01 (br. s, NH, 1H).  $^{13}\text{C}$  NMR ( $\text{CDCl}_3$ , 150MHz)  $\delta$  (ppm) = 148.1, 139.3, 129.2, 128.6, 127.4, 127.2, 117.5, 112.7, 48.2. HRMS (ESI/APCI):  $m/z$  = 184.1114 g/mol, calc'd. for C<sub>13</sub>H<sub>14</sub>N: 184.1121 g/mol. FTIR IR (ATR):  $\nu$  = 3410(w), 3022 (w), 1604 (m), 1507 (m), 1320 (w), 1261 (m), 731(s)  $\text{cm}^{-1}$

*N*-(4-methoxybenzyl)aniline (**1b**). It was obtained as yellow oil, yield 93 % (199mg);  $^1\text{H}$  NMR ( $\text{CDCl}_3$ , 600MHz)  $\delta$  (ppm) = 7.28-7.26 (d, JHH = 8.4Hz, 2H, Ar), 7.17-7.14 (m, 2H, Ar), 6.87-6.85 (m, 2H, Ar), 6.71-6.68 (t, 1H, Ar), 6.62-6.61 (m, 2H, Ar), 4.23 (br. s, NH, 1H), 3.90 (d, JHH = 13.2Hz, 1H), 3.78 (s, 3H).  $^{13}\text{C}$  NMR ( $\text{CDCl}_3$ , 150MHz)  $\delta$  (ppm) = 158.8, 148.1, 131.3, 129.2, 128.7, 117.4, 113.9, 112.7, 55.2, 47.7. HRMS (ESI/APCI):  $m/z$  = 214.1222 g/mol, calc'd. for C<sub>14</sub>H<sub>16</sub>NO [M]<sup>+</sup>: 214.1226 g/mol. FTIR IR (ATR):  $\nu$  = 3410 (w), 3029 (w), 2835 (w), 1604(s), 1507 (s), 1238(s), 1171(m), 1029 (m), 820 (m), 746 (s)  $\text{cm}^{-1}$ .

*N*-(*p*-chlorobenzyl)aniline (**1c**). It was obtained as colorless oil, yield 85 % (185mg);  $^1\text{H}$  NMR ( $\text{CDCl}_3$ , 600MHz)  $\delta$  (ppm) = 7.28 (s, 3H, Ar), 7.16-7.13 (m, 2H, Ar), 6.72-6.69 (m, 1H, Ar), 6.59-6.58 (m, 2H, Ar), 4.29(d, 2H, JHH = 5.4Hz), 4.04 (br. s, NH, 1H).  $^{13}\text{C}$  NMR

(CDCl<sub>3</sub>, 150MHz)  $\delta$  (ppm) = 147.7, 137.9, 132.8, 129.2, 128.7, 128.6, 117.7, 112.8, 47.5.

HRMS (ESI/APCI):  $m/z$  = 218.0731 g/mol, calc'd. for C<sub>13</sub>H<sub>13</sub>NCl [M]<sup>+</sup>: 218.0731 g/mol.

FTIR IR (ATR):  $\nu$  = 3417 (w), 3044 (w), 2843 (w), 1604(s), 1499 (s), 1320(m), 1253(m), 1089 (m), 813(m), 746 (s) cm<sup>-1</sup>.

*benzyl(4-methoxyphenyl)amine (Id)*. It was obtained as yellow oil, yield 90 % (193mg);

<sup>1</sup>H NMR (CDCl<sub>3</sub>, 600MHz)  $\delta$  (ppm) = 7.36-7.31 (m, Ar, 4H), 7.26-7.24 (t, Ar, 1H), 6.76-

6.75 (m, Ar, 2H), 6.58-6.59 (m, Ar, 2H), 4.26 (s, CH<sub>2</sub>, 2H), 3.72 (s, CH<sub>3</sub>, 3H). <sup>13</sup>C NMR

(CDCl<sub>3</sub>, 150MHz)  $\delta$  (ppm) = 152.1, 142.4, 139.6, 128.57, 127.52, 127.15, 114.8, 114.0,

55.7, 49.2. HRMS (ESI/APCI):  $m/z$  = 214.1222 g/mol, calc'd. for C<sub>14</sub>H<sub>16</sub>NO [M]<sup>+</sup>:

214.1226 g/mol. FTIR IR (ATR):  $\nu$  = 3402 (w), 3029 (w), 2835 (w), 1514(s), 1231 (s),

1178 (w), 1029 (m), 820 (m), 738 (m) cm<sup>-1</sup>.

*N-(4-chlorophenyl)benzylamine (Ie)*. It was obtained as yellow oil, yield 80 % (174mg); <sup>1</sup>H

NMR (CDCl<sub>3</sub>, 600MHz)  $\delta$  (ppm) = 7.33-7.19 (m, Ar, 4H), 7.10-7.06 (m, Ar, 2H), 6.54-

6.51 (m, Ar, 2H), 4.61 (s, 1H), 4.29-4.28 (d, CH<sub>2</sub>, 2H, J<sub>HH</sub> = 6.0Hz), 4.04(br. s, NH, 1H).

<sup>13</sup>C NMR (CDCl<sub>3</sub>, 150MHz)  $\delta$  (ppm) = 146.6, 138.9, 128.9, 128.6, 127.39, 127.35, 127.0,

126.5, 122.0, 113.8, 54.4, 48.3. HRMS (ESI/APCI):  $m/z$  = 218.07311 g/mol, calc'd. for

C<sub>13</sub>H<sub>13</sub>NCl [M]<sup>+</sup>: 218.07310 g/mol. FTIR IR (ATR):  $\nu$  = 3410 (w), 3029 (w), 2850 (w),

1596(s), 1499 (s), 1313 (m), 1178 (w), 1089 (w), 813 (m), 731 (m) cm<sup>-1</sup>.

*N-Benzyl-3,5-dimethoxyaniline (If)*. It was obtained as yellow oil, yield 90 % (219mg); <sup>1</sup>H

NMR (CDCl<sub>3</sub>, 600MHz)  $\delta$  (ppm) = 7.34-7.30 (m, Ar, 4H), 7.26-7.24 (t, Ar, 1H), 5.877-5.870 (m, Ar, 1H), 5.817-5.814(d, Ar, 2H, JHH = 1.8Hz), 4.28 (s, CH<sub>2</sub>, 2H), 4.03 (br. s, NH, 1H), 3.71 (s, 6H). <sup>13</sup>C NMR (CDCl<sub>3</sub>, 150MHz)  $\delta$  (ppm) = 161.6, 150.0, 139.2, 128.6, 127.5, 127.2, 91.6, 89.8, 55.1, 48.3. HRMS (ESI/APCI):  $m/z$  = 244.1333 g/mol, calc'd. for C<sub>15</sub>H<sub>18</sub>O<sub>2</sub>N [M]<sup>+</sup>: 244.1332 g/mol. FTIR IR (ATR):  $\nu$  = 3402 (w), 3007 (w), 2843 (w), 1596(s), 1455 (m), 1201(s), 1149(s), 1067 (m), 805(m), 731 (m) cm<sup>-1</sup>.

*N*-benzyl-(2-fluorophenyl)amine (**1g**). It was obtained as yellow oil, yield 87 % (176mg);

<sup>1</sup>H NMR (CDCl<sub>3</sub>, 600MHz)  $\delta$  (ppm) = 7.37-7.32 (m, Ar, 4H), 7.28-7.24 (m, Ar, 1H), 6.98-6.92 (m, Ar, 2H), 6.67-6.64 (m, Ar, 1H), 6.63-6.59 (m, Ar, 1H), 4.36-4.35 (d, 2H, JHH = 5.4Hz), 4.30 (br. s, NH, 1H). <sup>13</sup>C NMR (CDCl<sub>3</sub>, 150MHz)  $\delta$  (ppm) = 152.2, 150.6, 138.9, 136.5, 128.6, 127.3, 124.5, 116.7, 114.4, 114.2, 112.2, 47.8. HRMS (ESI/APCI):  $m/z$  = 202.1020 g/mol, calc'd. for C<sub>13</sub>H<sub>13</sub>NF [M]<sup>+</sup>: 202.1027 g/mol. FTIR IR (ATR):  $\nu$  = 3432(w), 3029(w), 2925(w), 1619(m), 1514(s), 1335(m), 1246(m), 1186(m), 746(s) cm<sup>-1</sup>.

*N*-ethyl-*N*-phenylamine (**1h**). It was obtained as colorless oil, yield 80 % (98mg); <sup>1</sup>H NMR

(CDCl<sub>3</sub>, 600MHz)  $\delta$  (ppm) = 7.24-7.14 (m, Ar, 2H), 6.68-6.66 (t, Ar, 1H), 6.59-6.58 (d, Ar, 2H, JHH = 7.8Hz), 3.52 (br. s, NH, 1H), 3.10-3.08 (q, 2H), 0.92-0.81 (t, 3H). <sup>13</sup>C NMR (CDCl<sub>3</sub>, 150MHz)  $\delta$  (ppm) = 148.0, 129.8, 116.5, 112.1, 45.0, 15.6. HRMS (ESI/APCI):  $m/z$  = 122.0965 g/mol, calc'd. for C<sub>8</sub>H<sub>12</sub>N [M]<sup>+</sup>: 122.0964 g/mol. FTIR IR (ATR):  $\nu$  = 3410 (w), 3051 (w), 2925 (m), 2857 (m), 1604 (s), 1507 (s), 1462 (s), 1320 (m), 1261 (m),



1149 (m), 1029 (s), 746 (s)  $\text{cm}^{-1}$ .

*N-propylaniline (Ii)*. It was obtained as colorless oil, yield 68 % (93mg);  $^1\text{H NMR}$  ( $\text{CDCl}_3$ , 600MHz)  $\delta$  (ppm) = 7.16-7.14 (m, Ar, 2H), 6.68-6.65 (t, Ar, 1H), 6.60-6.58 (t, Ar, 2H), 3.61 (br. s, NH, 1H), 3.07-3.05 (t, 2H), 1.64-1.60 (m,  $\text{CH}_2$ , 2H), 0.99-0.97 (t, 3H).  $^{13}\text{C NMR}$  ( $\text{CDCl}_3$ , 150MHz)  $\delta$  (ppm) = 148.4, 129.2, 117.0, 112.6, 45.7, 22.7, 11.6. HRMS (ESI/APCI):  $m/z$  = 136.1120 g/mol, calc'd. for  $\text{C}_9\text{H}_{14}\text{N}$   $[\text{M}]^+$ : 136.1121 g/mol. FTIR IR (ATR):  $\nu$  = 3410(w), 3022 (w), 2962 (w), 2932 (w), 1604 (m), 1507 (m), 1320 (m), 1253 (m), 1149 (w), 865(w), 746 (m)  $\text{cm}^{-1}$

*N-(n-butyl)aniline (Ij)*. It was obtained as colorless oil, yield 75 % (113mg);  $^1\text{H NMR}$  ( $\text{CDCl}_3$ , 600MHz)  $\delta$  (ppm) = 7.16-7.13 (m, Ar, 2H), 6.67-6.65 (m, Ar, 1H), 6.59-6.57 (m, Ar, 2H), 3.56 (br. s, NH, 1H), 3.10-3.07 (t, 2H), 1.61-1.54 (m, 2H), 1.44-1.38 (m, 2H), 0.95-0.92 (t, 3H).  $^{13}\text{C NMR}$  ( $\text{CDCl}_3$ , 150MHz)  $\delta$  (ppm) = 148.5, 129.1, 117.0, 112.6, 43.6, 31.6, 20.2, 13.9. HRMS (ESI/APCI):  $m/z$  = 150.1274 g/mol, calc'd. for  $\text{C}_{10}\text{H}_{16}\text{N}$   $[\text{M}]^+$ : 150.1277 g/mol. FTIR IR (ATR):  $\nu$  = 3417 (w), 3051 (w), 2932 (m), 2865 (m), 1604 (s), 1507 (s), 1320 (m), 1261 (m), 738 (s)  $\text{cm}^{-1}$ .

*N-hexylaniline (Ik)*. It was obtained as colorless oil, yield 72 % (128mg);  $^1\text{H NMR}$  ( $\text{CDCl}_3$ , 600MHz)  $\delta$  (ppm) = 7.16-7.13 (m, Ar, 2H), 6.67-6.65 (m, Ar, 1H), 6.59-6.57 (m, Ar, 2H), 3.56 (br. s, NH, 1H), 3.10-3.07 (t, 2H), 1.61-1.54 (m, 2H), 1.44-1.38 (m, 2H), 0.95-0.92 (t, 3H).  $^{13}\text{C NMR}$  ( $\text{CDCl}_3$ , 150MHz)  $\delta$  (ppm) = 148.5, 129.1, 117.0, 112.6, 43.6, 31.6, 28.7, 27.3, 23.2, 13.9. HRMS (ESI/APCI):  $m/z$  = 178.2920 g/mol, calc'd. for  $\text{C}_{12}\text{H}_{20}\text{N}^+$   $[\text{M}]^+$ : 178.2919 g/mol. FTIR IR (ATR):  $\nu$  = 3402 (w), 3059 (w), 2925 (m), 2857 (w), 1604 (s), 1507 (s), 1320 (m), 1253 (m), 1178 (w), 865 (w), 746 (s)  $\text{cm}^{-1}$

*4-Methoxy-N-(1-phenylethyl)aniline (Il)*. It was obtained as yellow oil, yield 79 % (179mg);  $^1\text{H NMR}$  ( $\text{CDCl}_3$ , 600MHz)  $\delta$  (ppm) = 7.50-7.48 (m, Ar, 2H), 7.18-7.16 (m, Ar, 2H), 6.89-6.65 (m, Ar, 3H), 6.60-6.58 (m, Ar, 2H), 4.20-4.17 (q, 1H).  $^{13}\text{C NMR}$  ( $\text{CDCl}_3$ , 150MHz)

$\delta$  (ppm) = 154.1, 148.5, 147.4, 142.5, 130.65, 129.1, 117.0, 112.6, 50.3, 30.8. HRMS (ESI/APCI):  $m/z$  = 228.3075 g/mol, calc'd. for  $C_{15}H_{18}NO^+$   $[M]^+$ : 228.3073 g/mol. FTIR IR (ATR):  $\nu$  = 3387 (m), 3216 (w), 2917 (m), 2843 (w), 1634 (m), 1507 (s), 1462 (s), 1298 (w), 1231 (s), 1126 (w), 1029 (s), 820 (s)  $cm^{-1}$ .

*N*-Isopropylaniline (**Im**). It was obtained as colorless oil, yield 90 % (123mg);  $^1H$  NMR ( $CDCl_3$ , 600MHz)  $\delta$  (ppm) = 7.15-7.13 (m, Ar, 2H), 6.69-6.67 (m, Ar, 1H), 6.60-6.58 (m, Ar, 2H), 3.39-3.36 (m, 1H), 1.09-1.08 (d, 6H).  $^{13}C$  NMR ( $CDCl_3$ , 150MHz)  $\delta$  (ppm) = 148.4, 129.2, 117.0, 112.6, 51.8, 21.8. HRMS (ESI/APCI):  $m/z$  = 136.1120 g/mol, calc'd. for  $C_9H_{14}N$   $[M]^+$ : 136.1121 g/mol. FTIR IR (ATR):  $\nu$  = 3395(w), 3059(w), 1634(m), 1581(s), 1462(m), 1268(m), 738(s)  $cm^{-1}$ .

*N*-Isopropyl-*p*-anisidine (**In**). It was obtained as colorless oil, yield 92 % (153mg);  $^1H$  NMR ( $CDCl_3$ , 600MHz)  $\delta$  (ppm) = 7.50-7.48 (m, Ar, 2H), 6.96-6.93 (m, Ar, 2H), 4.49-4.43 (m, 1H), 1.09-1.08 (d, 6H).  $^{13}C$  NMR ( $CDCl_3$ , 150MHz)  $\delta$  (ppm) = 154.1, 147.4, 142.5, 130.65, 55.8, 52.8, 49.5, 22.0. HRMS (ESI/APCI):  $m/z$  = 166.1223 g/mol, calc'd. for  $C_{10}H_{16}ON$   $[M]^+$ : 166.1226 g/mol. FTIR IR (ATR):  $\nu$  = 3365(w), 2962(w), 1619(w), 1507(s), 1231(s), 1171(m), 1037(m), 820(m)  $cm^{-1}$ .

*N*-benzylpyridin-2-amine (**Io**). It was obtained as yellow solid (mp: 93-95°C), yield 95 % (176mg);  $^1H$  NMR ( $CDCl_3$ , 600MHz)  $\delta$  (ppm) = 8.8-8.1 (m, Ar, 1H), 7.39-7.36 (m, Ar, 1H), 7.35-7.30 (m, Ar, 4H), 7.27-7.24 (m, Ar, 1H), 6.58-6.56 (m, 1H), 6.35-6.35 (t, 1H), 4.85 (br. s, NH, 1H), 4.49 (d, 2H,  $J_{HH} = 6.0Hz$ ).  $^{13}C$  NMR ( $CDCl_3$ , 150MHz)  $\delta$  (ppm) = 158.6, 148.2, 139.1, 137.4, 128.6, 127.3, 127.2, 113.1, 106.7, 46.3. HRMS (ESI/APCI):  $m/z$  = 185.1067g/mol, calc'd. for  $C_{12}H_{13}N_2$   $[M]^+$ : 185.1073 g/mol. FTIR IR (ATR):  $\nu$  = 3216(m), 3022(w), 29777(w), 1574(s), 1522(m), 1440(s), 1335(m), 1149(m), 1081(m)  $cm^{-1}$ .

*o*-(benzylamino)phenol (**Ip**). It was obtained as yellow oil, yield 75 % (150mg);  $^1H$  NMR ( $CDCl_3$ , 600MHz)  $\delta$  (ppm) = 11.0 (br. s, OH, 1H). 7.37-7.32 (m, Ar, 4H), 7.28-7.24 (m, Ar,

1H), 7.18-7.02 (m, Ar, 2H), 6.85-6.73 (m, Ar, 1H), 6.65-6.60 (m, Ar, 1H), 4.56-4.45 (d, 2H, JHH = 5.4Hz), 4.50 (br. s, NH, 1H). <sup>13</sup>C NMR (CDCl<sub>3</sub>, 150MHz) δ (ppm) = 155.1, 155.3, 130.1, 138.5, 130.2, 129.5, 126.3, 118.6, 115.2, 114.5, 110.0, 47.8. HRMS (ESI/APCI): *m/z* = 200.2542g/mol, calc'd. for C<sub>13</sub>H<sub>14</sub>NO<sup>+</sup> [M]<sup>+</sup>: 200.2545 g/mol. FTIR IR (ATR): ν = 3100-3500(br), 3037(w), 2925 (w), 2843 (w), 1581 (m), 1492 (m), 1447 (m), 1358 (m), 1238 (m), 1029 (w), 731(s) cm<sup>-1</sup>

*2-(benzylamino)pyrimidine (1q)*. It was obtained as yellow oil, yield 56 % (104mg); <sup>1</sup>H NMR (CDCl<sub>3</sub>, 600MHz) δ (ppm) = 8.25-8.24 (d, Ar, 2H, JHH = 4.8Hz) , 7.35-7.30 (m, Ar, 3H), 7.26-7.24 (m, Ar, 2H), 6.53-6.51 (t, Ar, 1H), 5.54 (br.s, NH, 1H), 4.63 (d, 2H, JHH = 4.0Hz). <sup>13</sup>C NMR (CDCl<sub>3</sub>, 150MHz) δ (ppm) = 162.2, 158.0, 139.0, 128.5, 127.4, 127.2, 110.8, 45.4. HRMS (ESI/APCI): *m/z* = 186.1019 g/mol, calc'd. for C<sub>11</sub>H<sub>12</sub>N<sub>3</sub> [M]<sup>+</sup>: 186.1026 g/mol. FTIR IR (ATR): ν = 3231(m), 3029(w) , 2857(m), 1574(s), 1529(s), 1447(s), 1261(s), 1067(m), 746(s) cm<sup>-1</sup>.

*(1H-benzoimidazol-2-yl)benzylamine (1r)*. It was obtained as yellow oil, yield 85 % (191mg); <sup>1</sup>H NMR (CDCl<sub>3</sub>, 600MHz) δ (ppm) = 7.36-7.30 (m, Ar, 4H), 7.29-7.24 (m, Ar, 4H), 7.04-7.02 (m, Ar, 2H), 4.58 (s, Ar,NH, 2H). <sup>13</sup>C NMR (CDCl<sub>3</sub>, 150MHz) δ (ppm) = 154.5, 138.0, 128.9, 127.8, 127.3, 120.8, 112.4, 47.3. HRMS (ESI/APCI): *m/z* = 224.1176 g/mol, calc'd. for C<sub>14</sub>H<sub>14</sub>N<sub>3</sub> [M]<sup>+</sup>: 224.1182 g/mol. FTIR IR (ATR): ν = 3395(w), 3059(w), 1634(m), 1581(s), 1462(m), 738(s) cm<sup>-1</sup>.

*N-methyl-N-phenyl-benzenemethanamine (2a)*. It was obtained as colorless oil, yield 82 % (163mg); <sup>1</sup>H NMR (CDCl<sub>3</sub>, 600MHz) δ (ppm) = 7.35-7.30 (m, Ar, 4H), 7.25-7.22 (m, Ar, 1H), 7.15-7.13 (m, Ar, 2H), 6.70-6.67 (t, Ar, 1H), 6.68-6.64 (d, Ar, 2H, JHH = 7.8Hz), 4.35 (s, CH<sub>2</sub>, 2H), 3.10 (s, 3H). <sup>13</sup>C NMR (CDCl<sub>3</sub>, 150MHz) δ (ppm) = 148.7, 139.8, 129.6, 128.8, 127.8, 127.5, 117.2, 112.5, 48.0, 45.7. HRMS (ESI/APCI): *m/z* = 198.2821 g/mol, calc'd. for C<sub>14</sub>H<sub>16</sub>N<sup>+</sup> [M]<sup>+</sup>: 198.2819 g/mol. FTIR IR (ATR): ν = 3029 (w), 2925

(w), 2857 (w), 1596 (s), 1499 (s), 1455 (m), 1350 (m), 1111 (m), 1029 (m), 940 (m), 746 (s), 723 (s)  $\text{cm}^{-1}$

*N*-benzyl-*N*-(4-chloro-benzyl)-aniline (**2b**). It was obtained as colorless oil, yield 80 % (247 mg);  $^1\text{H}$  NMR ( $\text{CDCl}_3$ , 600 MHz)  $\delta$  (ppm) = 7.31-7.29 (m, Ar, 4H), 7.24-7.22 (m, Ar, 6H), 7.16-7.13 (m, Ar, 2H), 6.72-6.67 (m, Ar, 2H), 4.63-4.60 (d, Ar, 2H, JHH = 23.4 Hz).  $^{13}\text{C}$  NMR ( $\text{CDCl}_3$ , 150 MHz)  $\delta$  (ppm) = 149.1, 138.5, 132.8, 129.1, 128.6, 127.8, 127.0, 126.8, 126.6, 116.6, 117.7, 112.3, 54.5, 49.8. HRMS (ESI/APCI):  $m/z$  = 308.8225 g/mol, calc'd. for  $\text{C}_{20}\text{H}_{19}\text{NCl}^+$   $[\text{M}]^+$ : 308.8226 g/mol. FTIR IR (ATR):  $\nu$  = 3051 (w), 2902 (w), 2857 (w), 1596 (m), 1492 (m), 1358 (m), 1231 (m), 955 (m), 805 (m), 731 (s),  $\text{cm}^{-1}$

*N,N*-dibenzylaniline (**2c**). It was obtained as yellow solid (mp: 68-70°C), yield 86 % (236 mg);  $^1\text{H}$  NMR ( $\text{CDCl}_3$ , 600 MHz)  $\delta$  (ppm) = 7.31-7.29 (m, Ar, 4H), 7.24-7.22 (m, Ar, 6H), 7.16-7.13 (m, Ar, 2H), 6.72-6.67 (m, Ar, 2H), 4.63-4.60 (d, Ar, 2H, JHH = 23.4 Hz).  $^{13}\text{C}$  NMR ( $\text{CDCl}_3$ , 150 MHz)  $\delta$  (ppm) = 149.1, 138.5, 129.1, 128.6, 126.8, 126.6, 116.6, 112.3, 54.1. HRMS (ESI/APCI):  $m/z$  = 274.1588 g/mol, calc'd. for  $\text{C}_{20}\text{H}_{20}\text{N}$   $[\text{M}]^+$ : 274.1590 g/mol. FTIR IR (ATR):  $\nu$  = 3037 (w), 2917 (m), 1596 (s), 1499 (s), 1455 (m), 1358 (m), 1231 (m), 1029 (w), 955 (m), 731 (s)  $\text{cm}^{-1}$

*N*-phenylpyrrolidine (**3a**). It was obtained as colorless oil, yield 80 % (119 mg);  $^1\text{H}$  NMR ( $\text{CDCl}_3$ , 600 MHz)  $\delta$  (ppm) = 7.17-7.26 (m, 3H), 6.93-6.96 (m, 2H), 6.75-6.96 (m, 1H), 3.38-3.44 (m, 4H), 2.01-2.07 (m, 3H). HRMS (ESI/APCI):  $m/z$  = 148.2231 g/mol, calc'd. for  $\text{C}_{13}\text{H}_{14}\text{N}$ : 148.2234 g/mol. FTIR IR (ATR):  $\nu$  = 3059 (w), 3029 (w), 2962 (m), 2925 (s), 2835 (m), 1604 (m), 1596 (s), 1507 (s), 1462 (m), 1365 (s), 1358 (w), 1238 (w), 1186 (m), 1156 (m), 992 (m), 746 (s), 686 (s)  $\text{cm}^{-1}$

*N*-(4-chlorophenyl) pyrrolidine (**3b**). It was obtained as colorless oil, yield 85 % (155 mg);  $^1\text{H}$  NMR ( $\text{CDCl}_3$ , 600 MHz)  $\delta$  (ppm) = 7.37-7.42 (m, 3H), 7.07-7.09 (m, 1H), 2.83-2.85 (m, 4H), 2.19-2.22 (m, 4H). HRMS (ESI/APCI):  $m/z$  = 182.6683 g/mol, calc'd. for  $\text{C}_{11}\text{H}_{13}\text{NCl}^+$

$[M]^+$  : 182.6686 g/mol. FTIR (ATR):  $\nu = 2962(w), 2925(s), 2857(m), 1738(s), 1604(m), 1470(m), 1462(m), 1373(s), 275(w), 1231(s), 1156(w), 1074(w), 1014(w), 798(m) \text{ cm}^{-1}$ .

*N*-(4-methoxyphenyl) pyrrolidine (**3c**). It was obtained as colorless oil, yield 89 % (159mg);  $^1\text{H}$  NMR ( $\text{CDCl}_3$ , 600MHz)  $\delta$  (ppm) = 6.62-6.74 (m, 4H), 3.79 (s, 3H), 3.38-3.43(t, J=6 Hz 4H), 2.01-2.06 (t, J=6 Hz 4H), 2.01–1.98 (m, 4H).  $^{13}\text{C}$  NMR ( $\text{CDCl}_3$ , 150MHz)  $\delta$  (ppm) = 149.2, 141.1, 116.1, 114.1, 78.1, 56.1, 51.1, 25.9. HRMS (ESI/APCI):  $m/z = 178.2485$  g/mol, calc'd. for  $\text{C}_{11}\text{H}_{16}\text{NO}^+$   $[M]^+$ : 178.2488 g/mol. FTIR (ATR):  $\nu = 3044(w), 2947(m), 2925(s), 2857(m), 1619 (w), 1514(m), 1484(w), 1462(m), 1365(m), 1275(w), 1238(m), 1178(w), 1156(w), 1044(m), 970(w), 805(s), 731(w) \text{ cm}^{-1}$ .

*N*-phenylpiperidine (**3d**). It was obtained as colorless oil, yield 75 % (122mg);  $^1\text{H}$  NMR ( $\text{CDCl}_3$ , 600MHz)  $\delta$  (ppm) = 7.26 (t, 2H, J=7 Hz), 6.99 (d, 2H, J=7 Hz), 6.86 (t, 1H, J=7 Hz), 3.17 (t, 4H, J=6.7 Hz), 1.75 (m, 4H), 1.61 (t, 2H, J=4.8 Hz).  $^{13}\text{C}$  NMR ( $\text{CDCl}_3$ , 150MHz)  $\delta$  (ppm) = 151.6, 129.0, 119.7, 116.7, 60.0, 25.7, 24.2. HRMS (ESI/APCI):  $m/z = 162.2495$  g/mol, calc'd. for  $\text{C}_{11}\text{H}_{16}\text{N}^+$   $[M]^+$ : 162.2498 g/mol. FTIR IR (ATR):  $\nu = 2932 (m), 2853 (m), 2805 (m), 1597 (s), 1494 (s), 1450 (m), 1384 (m), 1235 (s), 1220 (s), 1131 (m), 917 (m), 753 (s) \text{ cm}^{-1}$ .

*N*-(4-methoxyphenyl) piperidine (**3e**). It was obtained as colorless oil, yield 78 % (150mg);  $^1\text{H}$  NMR ( $\text{CDCl}_3$ , 600MHz)  $\delta$  (ppm) = 6.93–6.90 (m, 2H), 6.84–6.81 (m, 2 H), 3.76 (s, 3 H), 3.03–3.01(m, 4 H), 1.74–1.70 (m, 4 H), 1.56–1.52 (m, 2 H).  $^{13}\text{C}$  NMR ( $\text{CDCl}_3$ , 150MHz)  $\delta$  (ppm) = 154.0, 145.2, 119.0, 114.3, 55.6, 52.7, 25.8, 23.9. HRMS (ESI/APCI):  $m/z = 192.2753$ g/mol, calc'd. for  $\text{C}_{12}\text{H}_{18}\text{NO}^+$   $[M]^+$ : 192.2752 g/mol. FTIR (ATR):  $\nu = 2932(m), 2850(w), 2800(w), 1507(s), 1447 (m), 1238(s), 1178(m), 1119(m), 1037(s), 917(m), 858(w), 820(s), 798(w), 701(w) \text{ cm}^{-1}$ .

1-(piperidine-1-yl) pyridine (**3f**). It was obtained as y colorless oil, yield 70 % (114mg);  $^1\text{H}$  NMR ( $\text{CDCl}_3$ , 600MHz)  $\delta$  (ppm) = 8.17 (s, 1H), 7.46 (t, J = 8Hz, 1H), 6.67 (d, J = 7Hz,

1H), 6.54 (dd, J = 4.9, 0.9 Hz, 1H), 3.54(s, 4H), 1.67 (s, 6H). <sup>13</sup>C NMR (CDCl<sub>3</sub>, 150MHz) δ (ppm) = 159.1, 147.2, 137.7, 112.3, 107.4, 46.5, 25.4, 24.6. HRMS (ESI/APCI): *m/z* = 163.2381 g/mol, calc'd. for C<sub>10</sub>H<sub>15</sub>N<sub>2</sub><sup>+</sup> [M]<sup>+</sup>: 163.2380 g/mol. FTIR (ATR): ν = 3007(w), 2925(m), 2850(m), 1596(s), 1484(s), 1432(s), 1380(w), 1313(m), 1246(s), 1156(w), 1126(m), 1022(w), 850(w), 768 (s), 732(w) cm<sup>-1</sup>.

*1-methyl-4-(pyridin-2-yl) piperazine (3g)*. It was obtained as colorless oil, yield 70 % (125mg); <sup>1</sup>H NMR (CDCl<sub>3</sub>, 600MHz) δ (ppm) = 48 (dd, 1H), 7.46 (ddd, 1H), 7.18 – 7.26 (m, 2H), 3.97-3.99 (m, 4H), 2.34-2.36 (m, 4H), 1.99-2.01(m, 2H). <sup>13</sup>C NMR (CDCl<sub>3</sub>, 150MHz) δ (ppm) = 138.9 , 133.2, 132.1, 130.4, 129.6, 59.9, 58.6, 52.9. HRMS (ESI/APCI): *m/z* = 178.2522g/mol, calc'd. for C<sub>10</sub>H<sub>16</sub>N<sub>3</sub><sup>+</sup> [M]<sup>+</sup>: 178.2525 g/mol. IR(ATR) : ν = 3328(s), 2932(m), 2865(m), 1626(m), 1604 (s), 1529 (w), 1514(s), 1447(m), 1156(w), 1052(m), 1029(w), 887(w), 858(w), 768(s), 701(w) cm<sup>-1</sup>.

*Benzylpiperazine (3h)*. It was obtained as colorless oil, yield 90 % (160mg); <sup>1</sup>H NMR (CDCl<sub>3</sub>, 600MHz) δ (ppm) = 7.29-7.22 (m, Ar, 5H), 3.56-3.40 (m, 4H), 2.89-2.86 (m, 4H), 2.41 (br. s, NH , 1H). <sup>13</sup>C NMR (CDCl<sub>3</sub>, 150MHz) δ (ppm) = 137.8, 129.2, 128.1, 127.0, 64.0, 54.1, 45.8. HRMS (ESI/APCI): *m/z* = 177.2642 g/mol, calc'd. for C<sub>11</sub>H<sub>17</sub>N<sub>2</sub><sup>+</sup> [M]<sup>+</sup>: 177.2644g/mol. FTIR (ATR): ν = 3320(s), 3029(w), 2940(m), 2820(m), 1641(s), 1544 (m), 1492(w), 1455(s), 1417(m), 1268(s), 1134(m), 999(s), 910(w), 738(s) cm<sup>-1</sup>.

*1-methyl-4-phenyl piperazine (3i)*. It was obtained as colorless oil, yield 75 % (133mg); <sup>1</sup>H NMR (CDCl<sub>3</sub>, 600MHz) δ (ppm) = 7.26-7.31 (m, Ar, 2H), 7.05-7.09 (m, Ar, 1H), 6.92-6.99 (m, Ar, 2H), 3.63 (t, J = 4.6 Hz, 4H), 2.85-2.87 (m, 7H). <sup>13</sup>C NMR (CDCl<sub>3</sub>, 150MHz) δ (ppm) = 149.3, 129.4, 121.8, 117.2, 55.4, 46.9, 43.6. HRMS (ESI/APCI): *m/z* = 177.2646 g/mol, calc'd. for C<sub>11</sub>H<sub>17</sub>N<sub>2</sub><sup>+</sup> [M]<sup>+</sup>: 177.2644 g/mol. FTIR (ATR): ν = 3059(w), 2940(m), 2850(w), 2798(s), 1596(s), 1499 (s), 1455(m), 1373(w), 1335(w), 1417(m), 1268(s), 1134(m), 999(s), 910(w), 738(s) cm<sup>-1</sup>.

*Hydroxyine*. It was obtained as yellow solid (mp: 190-192°C), yield 55 % (total yield of the tandem reaction, 207mg); <sup>1</sup>H NMR (CDCl<sub>3</sub>, 600MHz) δ (ppm) = 7.16-7.37 (m, Ar, 10H), 4.19 (s, 1H), 3.44-3.56 (m, 6H), 2.38-2.57 (m, 8H), 1.16 (t, 2H, JHH = 6Hz). <sup>13</sup>C NMR (CDCl<sub>3</sub>, 150MHz) δ (ppm) = 142.0, 141.1, 132.4, 129.1, 128.3, 127.8, 126.9, 75.5, 67.9, 66.3, 66.1, 57.9, 57.5, 53.9, 51.4, 15.0. HRMS (ESI/APCI): *m/z* = 375.9088 g/mol, calc'd. for C<sub>21</sub>H<sub>28</sub>ClN<sub>2</sub>O<sub>2</sub><sup>+</sup> [M]<sup>+</sup>: 375.9086 g/mol. FTIR (ATR): ν = 3300 (S), 3081 (w), 3074 (w), 3014 (w), 2954 (w), 2910 (w), 2865 (w), 2835 (w), 1604 (s), 1574 (s), 1529 (s), 1447 (s), 1246 (m), 1037(m), 820(s), 768(s) cm<sup>-1</sup>

*Cyclizine*. It was obtained as yellow solid (mp: 105-107°C), yield 60 % (160mg); <sup>1</sup>H NMR (CDCl<sub>3</sub>, 600MHz) δ (ppm) = 7.44-7.17 (m, 10H, Ph), 4.26 (s, 1H, N-CH), 3.31 (s, 8H, N-CH), 2.30 (s, 3H, N-CH<sub>3</sub>). <sup>13</sup>C NMR (CDCl<sub>3</sub>, 150MHz) δ (ppm) = 142.6, 128.3, 127.9, 126.7, 77.4, 56.3, 46.2 HRMS (ESI/APCI): *m/z* = 267.3861 g/mol, calc'd. for C<sub>18</sub>H<sub>23</sub>N<sub>2</sub> [M]<sup>+</sup>: 267.3863 g/mol. FTIR (ATR): ν = 3059(w), 3029(w), 2925(m), 2857(w), 1619(s), 1492(m), 1447(m), 1275(m), 1149(w), 1074(w), 1029(w), 984(w), 925(w), 858(w), 746(s), 701(s) cm<sup>-1</sup>.

(1)

## II. Gas Chromatogram of Purified Compounds

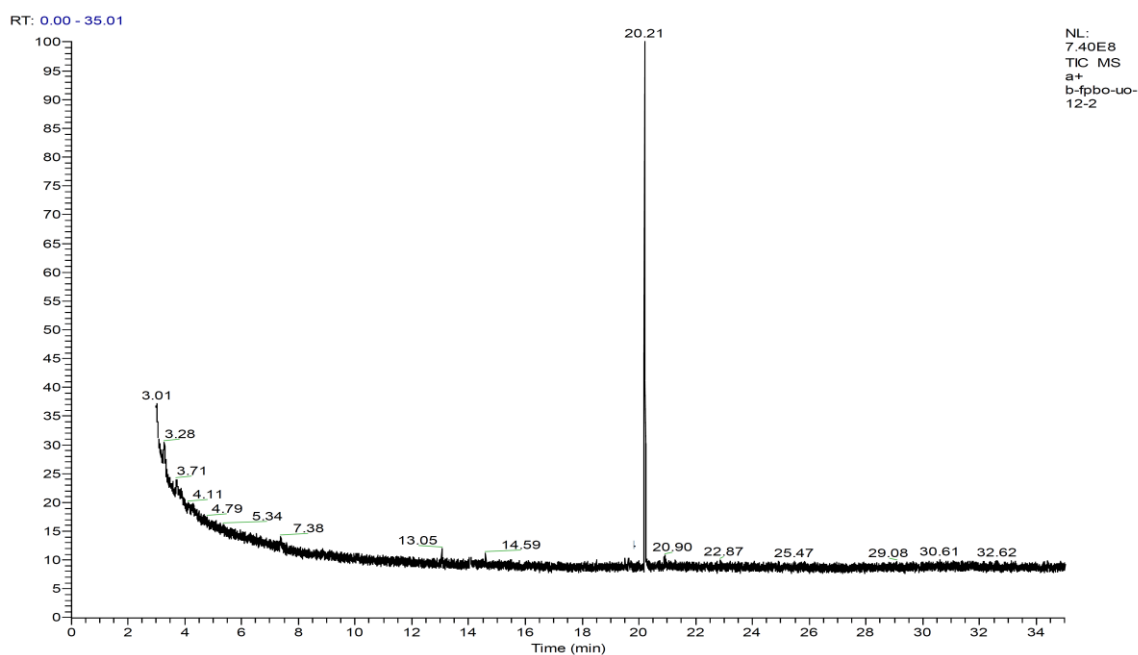

Figure S1. Gas chromatogram of purified N-benzylaniline

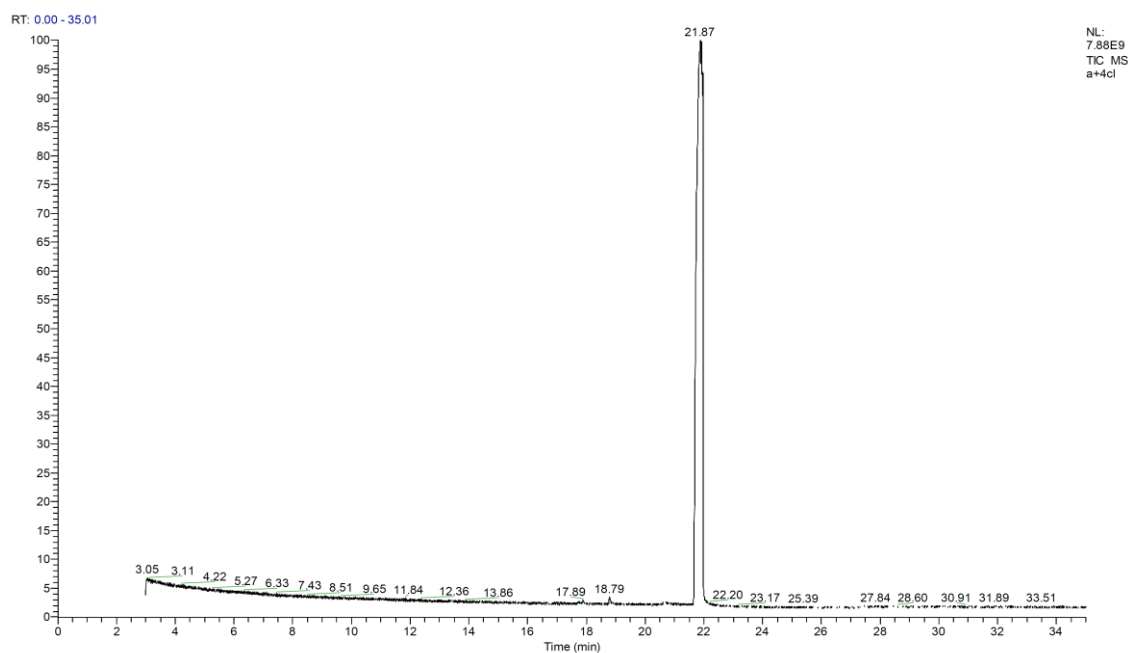

Figure S2. Gas chromatogram of purified N-(4-methoxybenzyl)aniline



Iridium/Graphene Nanostructured Catalyst for the N-Alkylation of Amines to Synthesize Nitrogen-containing Derivatives and Heterocyclic Compounds in Green Process

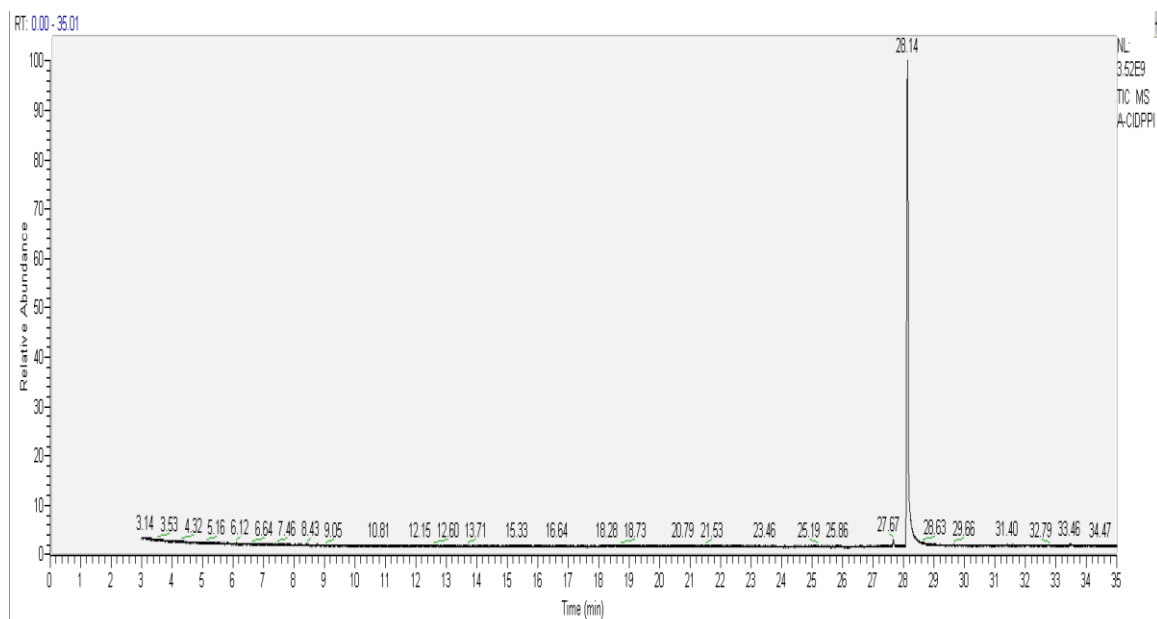

**Figure S3.** Gas chromatogram of purified N-(p-chlorobenzyl)aniline

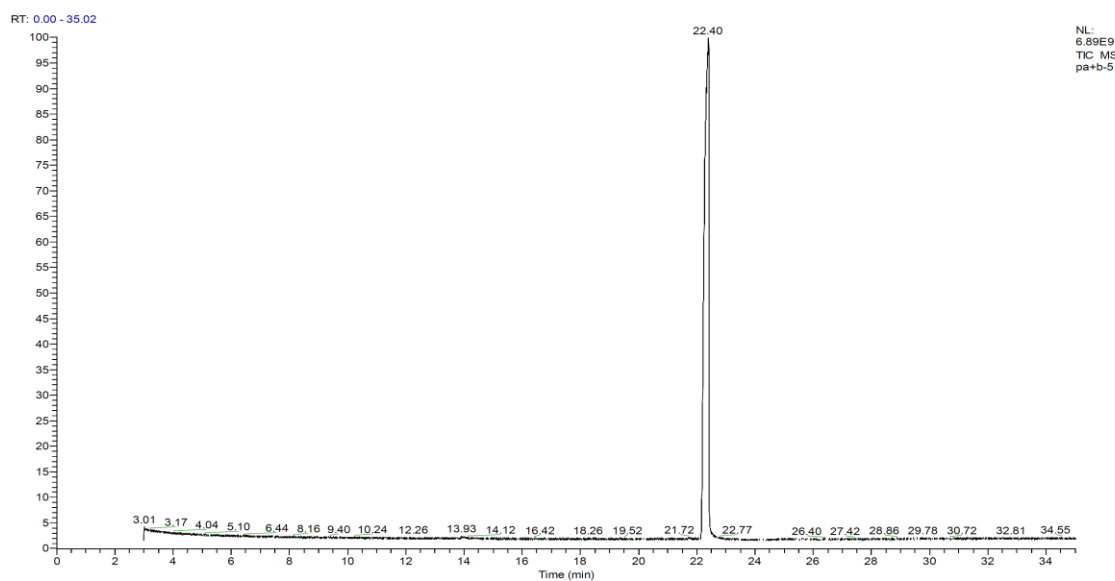

**Figure S4.** Gas chromatogram of purified benzyl(4-methoxyphenyl)amine

Iridium/Graphene Nanostructured Catalyst for the N-Alkylation of Amines to Synthesize Nitrogen-containing Derivatives and Heterocyclic Compounds in Green Process

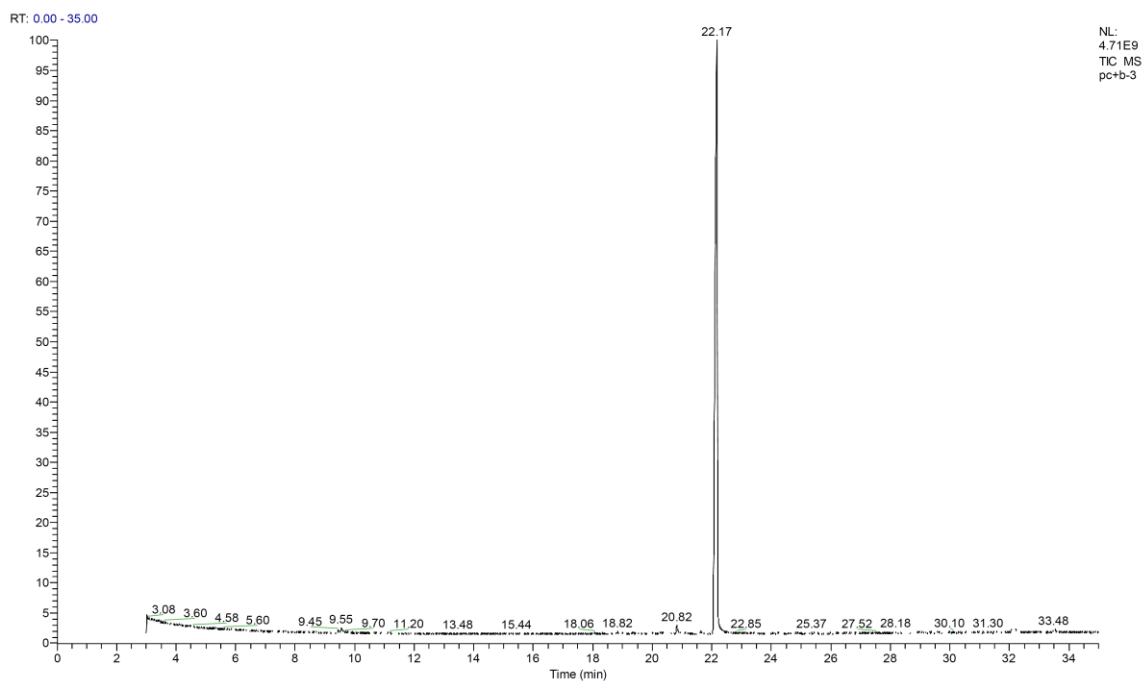

Figure S5. Gas chromatogram of purified N-(4-chlorophenyl)benzylamine

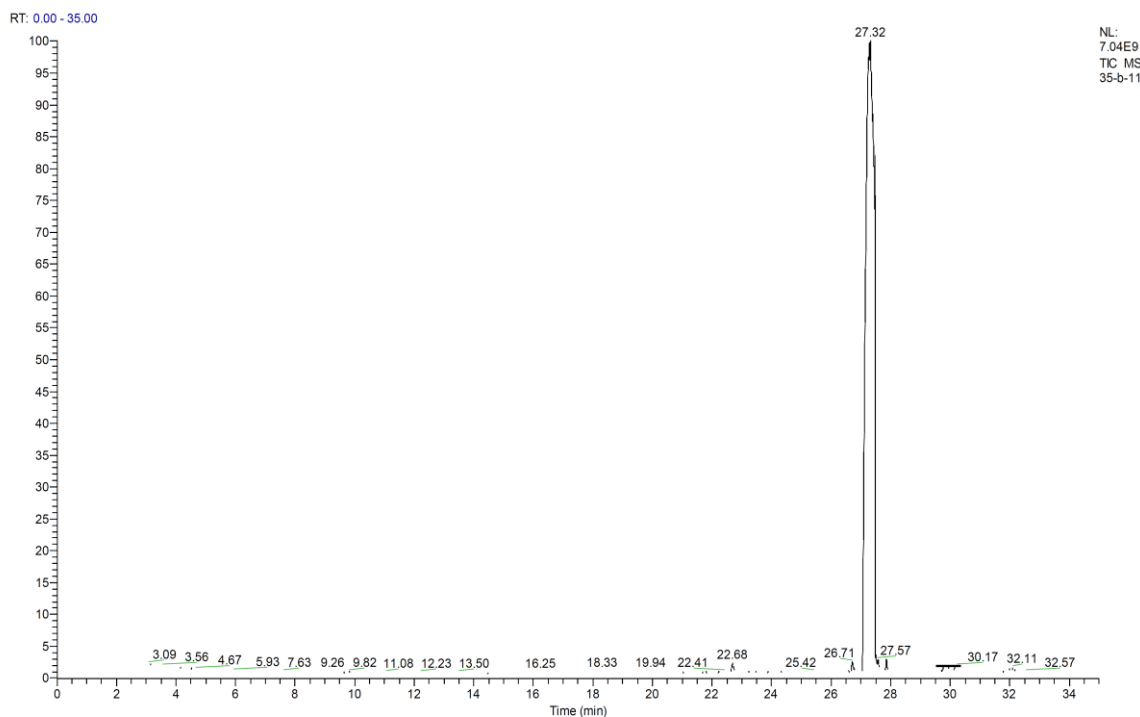

Figure S6. Gas chromatogram of purified N-Benzyl-3,5-dimethoxyaniline

Iridium/Graphene Nanostructured Catalyst for the N-Alkylation of Amines to Synthesize Nitrogen-containing Derivatives and Heterocyclic Compounds in Green Process

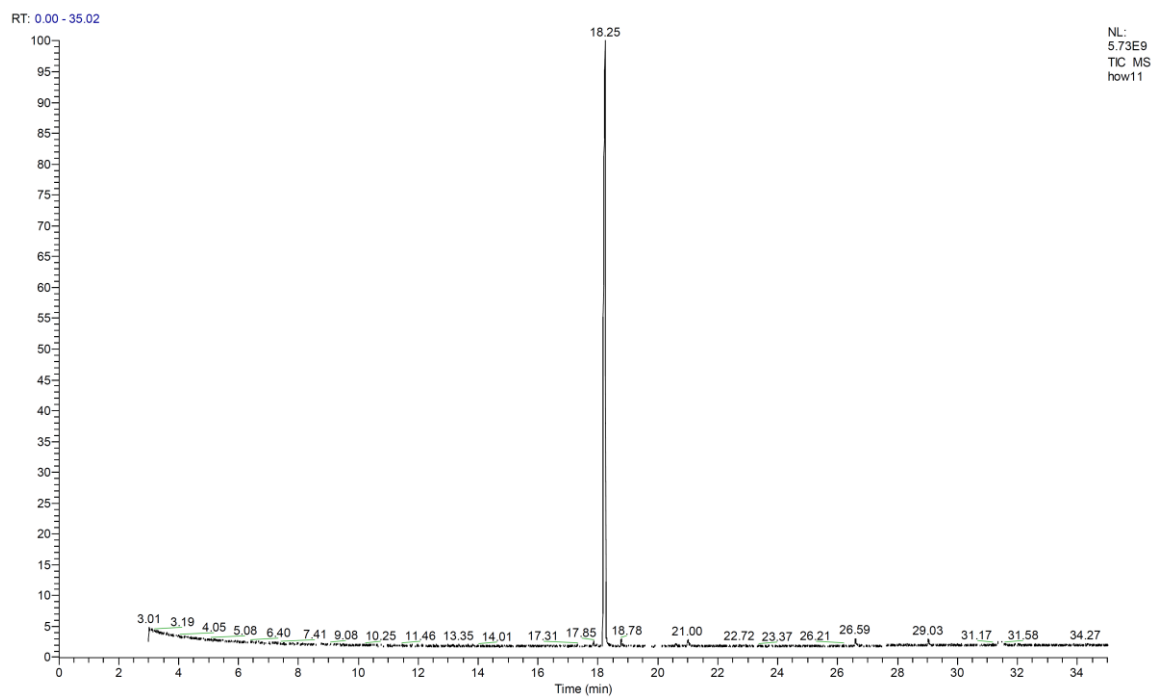

**Figure S7.** Gas chromatogram of purified N-benzyl-(2-fluorophenyl)amine

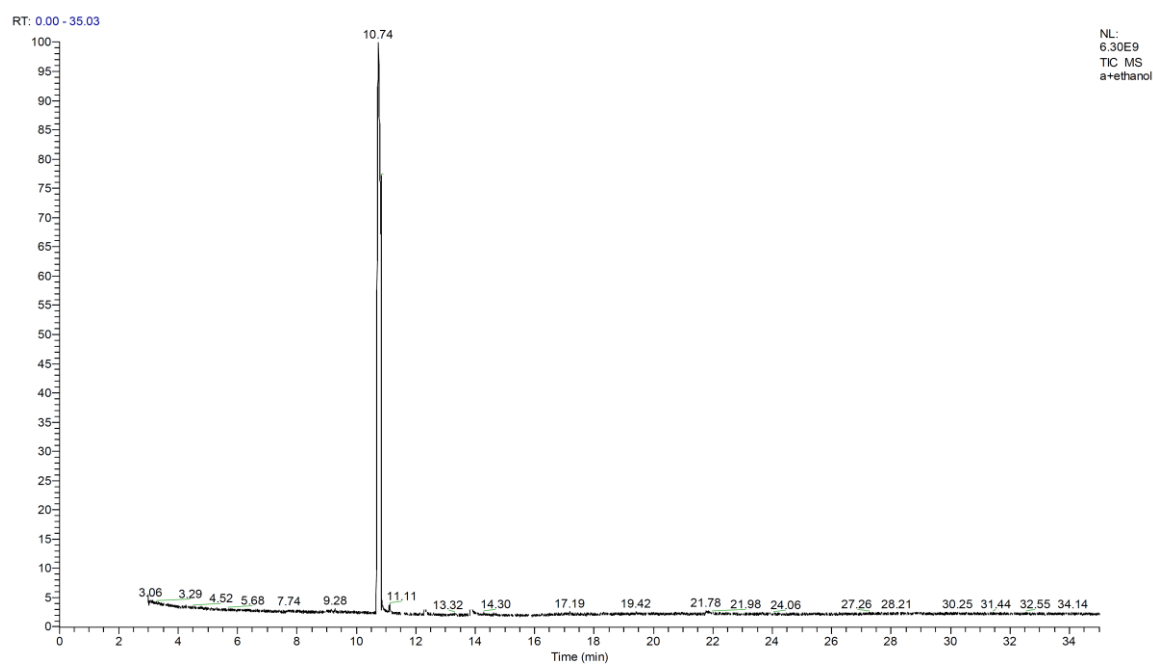

**Figure S8.** Gas chromatogram of purified N-ethyl-N-phenylamine

Iridium/Graphene Nanostructured Catalyst for the N-Alkylation of Amines to Synthesize Nitrogen-containing Derivatives and Heterocyclic Compounds in Green Process

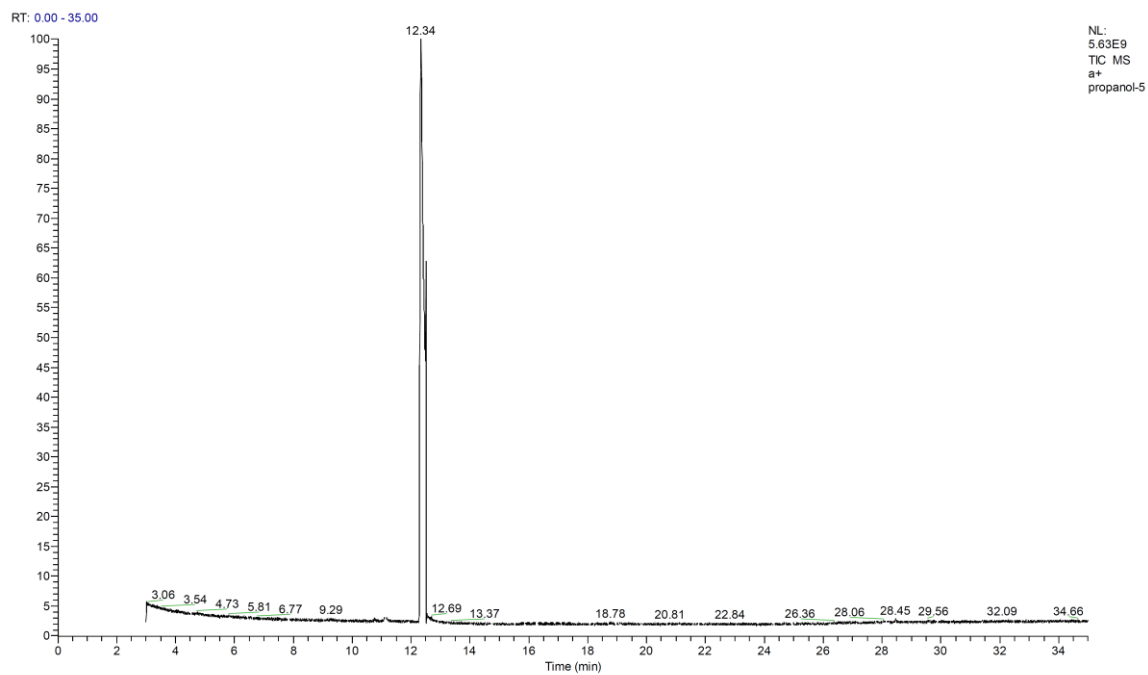

Figure S9. Gas chromatogram of purified N-propylaniline

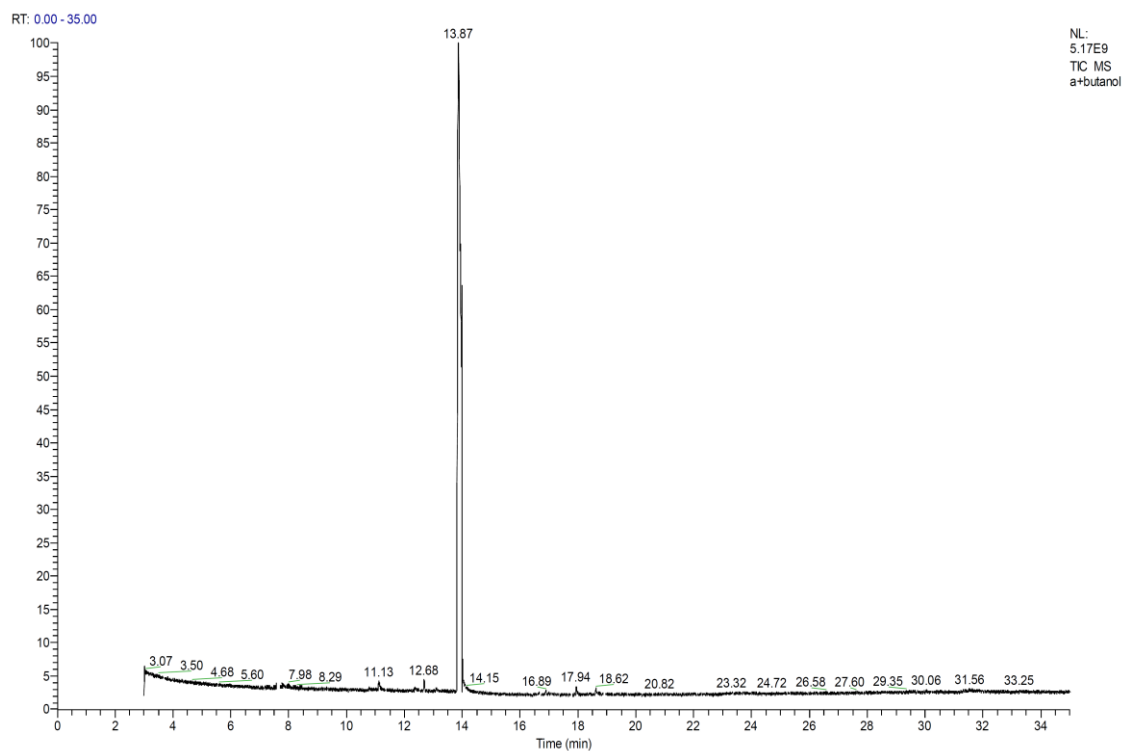

Figure S10. Gas chromatogram of purified N-(n-butyl)aniline

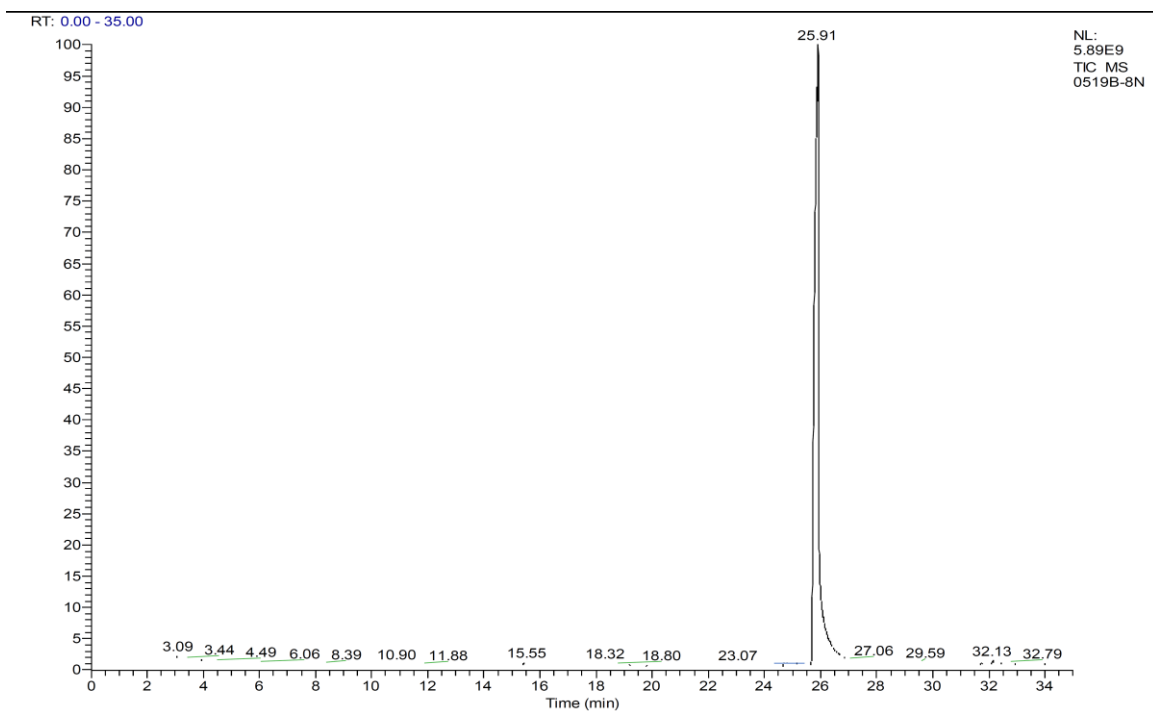

Figure S11. Gas chromatogram of purified N-hexylaniline

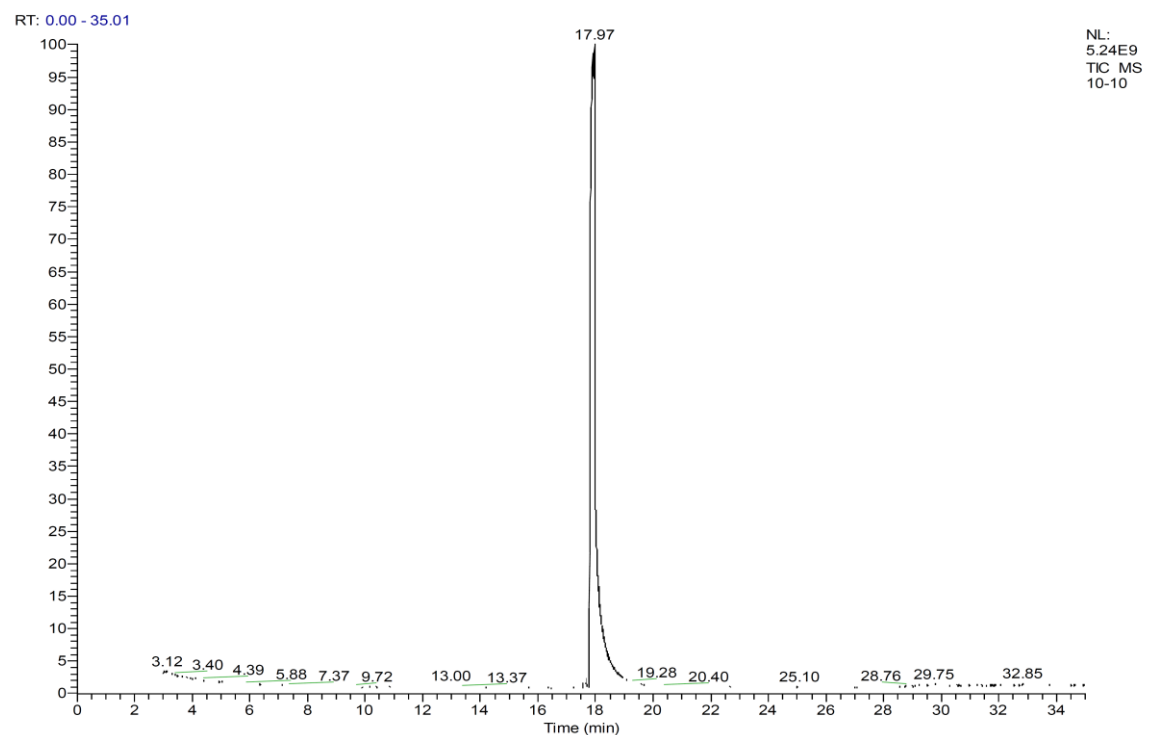

Figure S12. Gas chromatogram of purified 4-Methoxy-N-(1-phenylethyl)aniline

Iridium/Graphene Nanostructured Catalyst for the N-Alkylation of Amines to Synthesize Nitrogen-containing Derivatives and Heterocyclic Compounds in Green Process

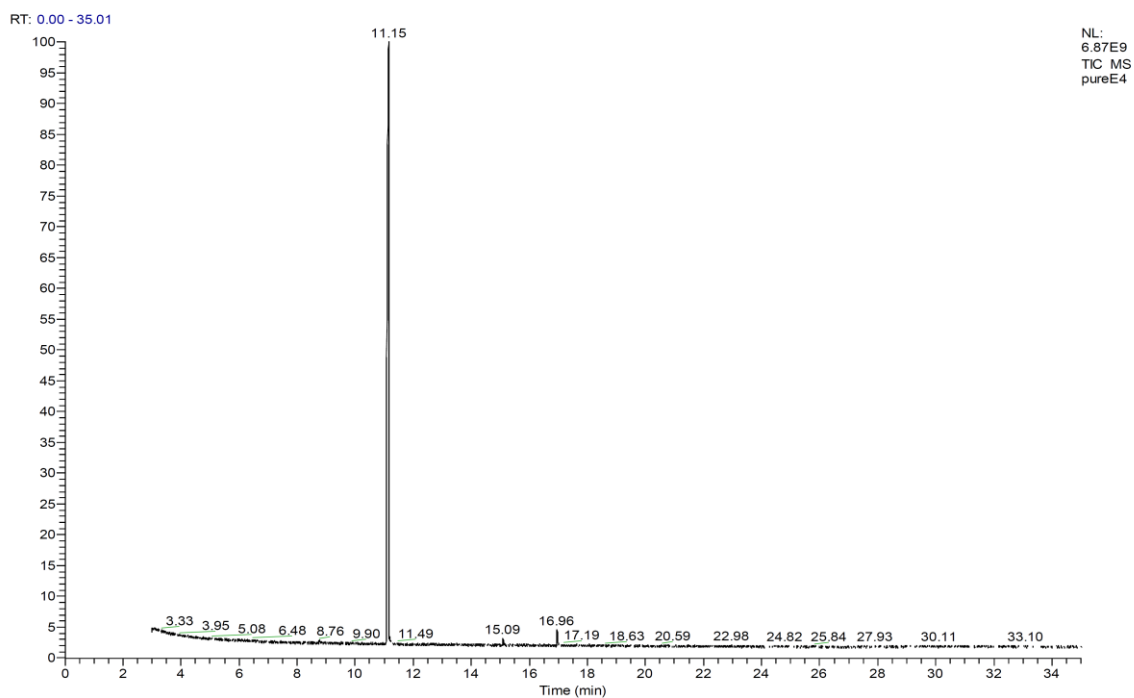

Figure S13. Gas chromatogram of purified N-Isopropylaniline

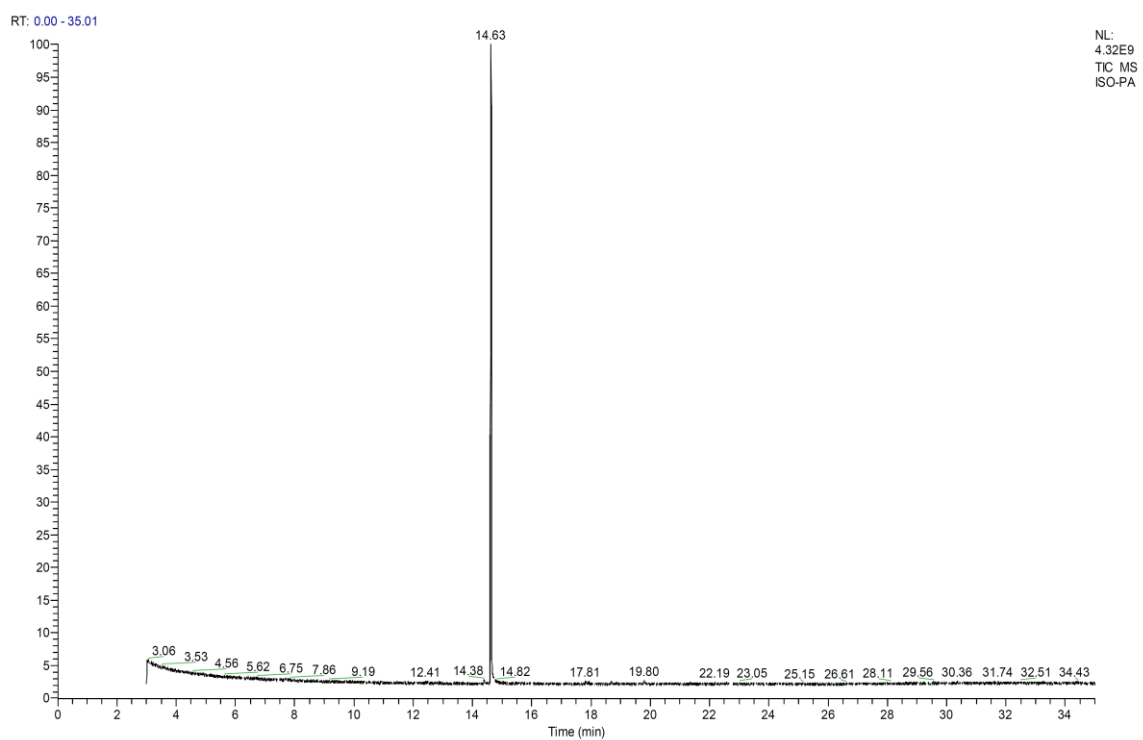

Figure S14. Gas chromatogram of purified N-Isopropyl-p-anisidine

Iridium/Graphene Nanostructured Catalyst for the N-Alkylation of Amines to Synthesize Nitrogen-containing Derivatives and Heterocyclic Compounds in Green Process

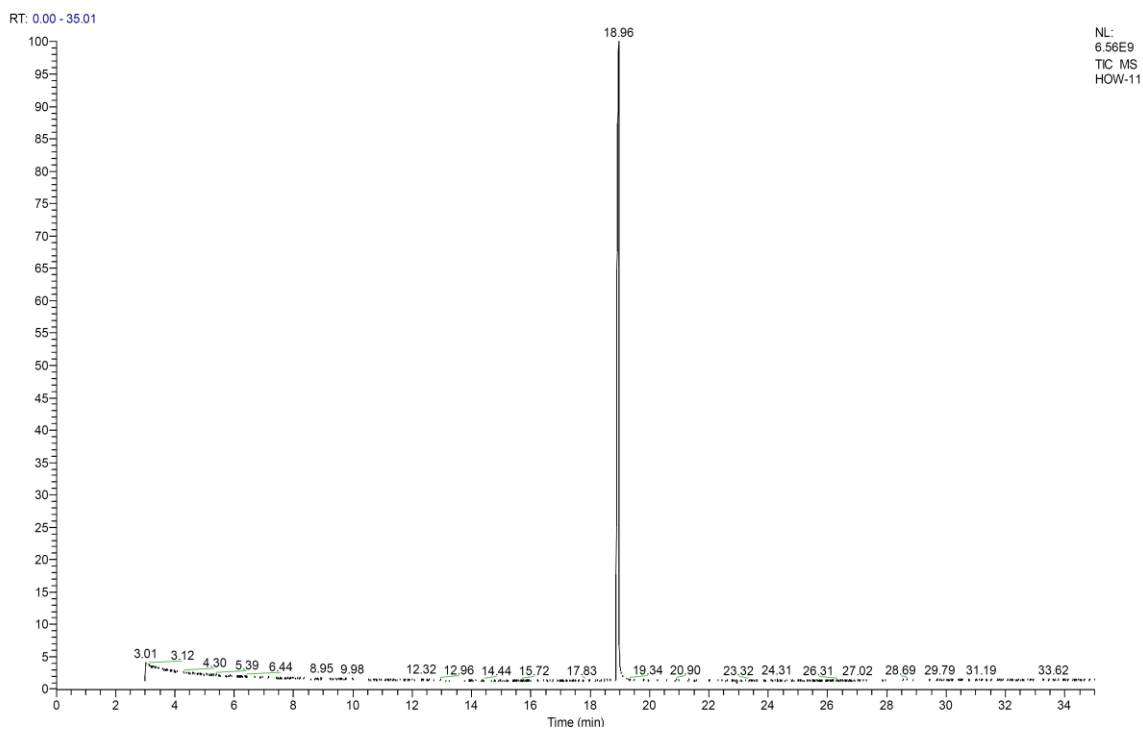

Figure S15. Gas chromatogram of purified N-benzylpyridin-2-amine

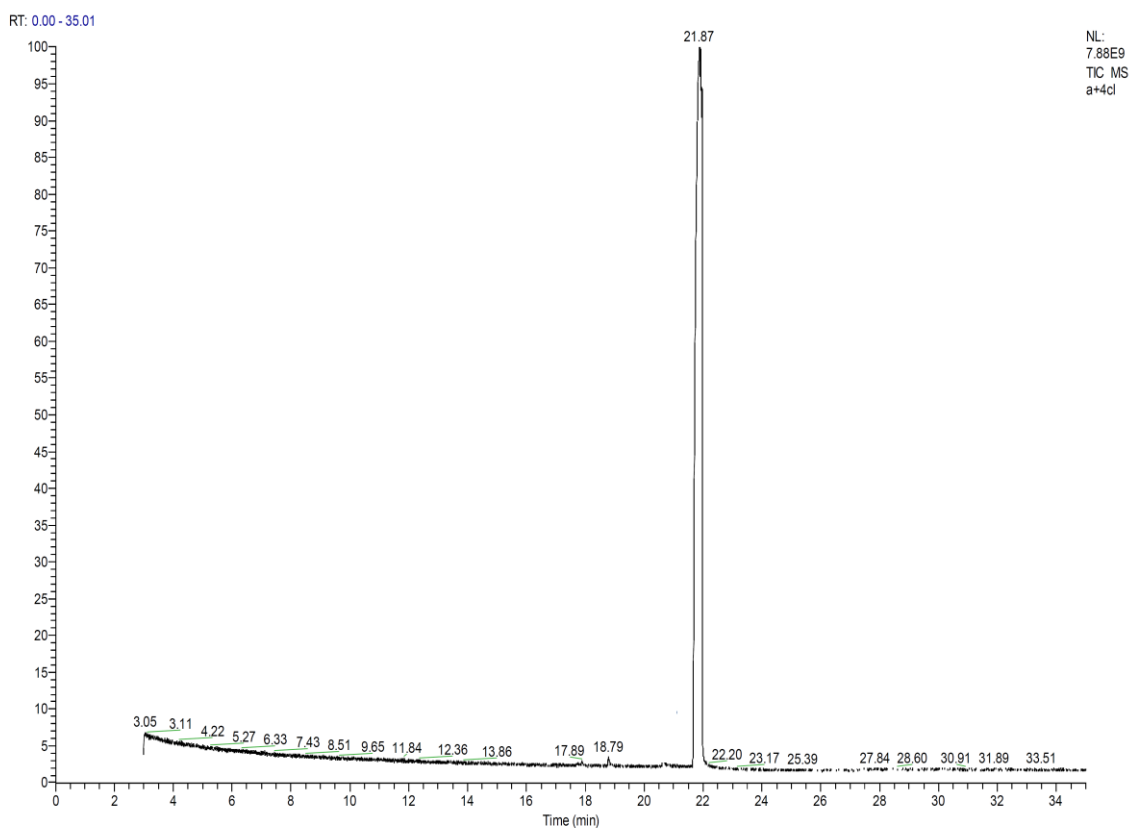

Figure S16. Gas chromatogram of purified o-(benzylamino)phenol

Iridium/Graphene Nanostructured Catalyst for the N-Alkylation of Amines to Synthesize Nitrogen-containing Derivatives and Heterocyclic Compounds in Green Process

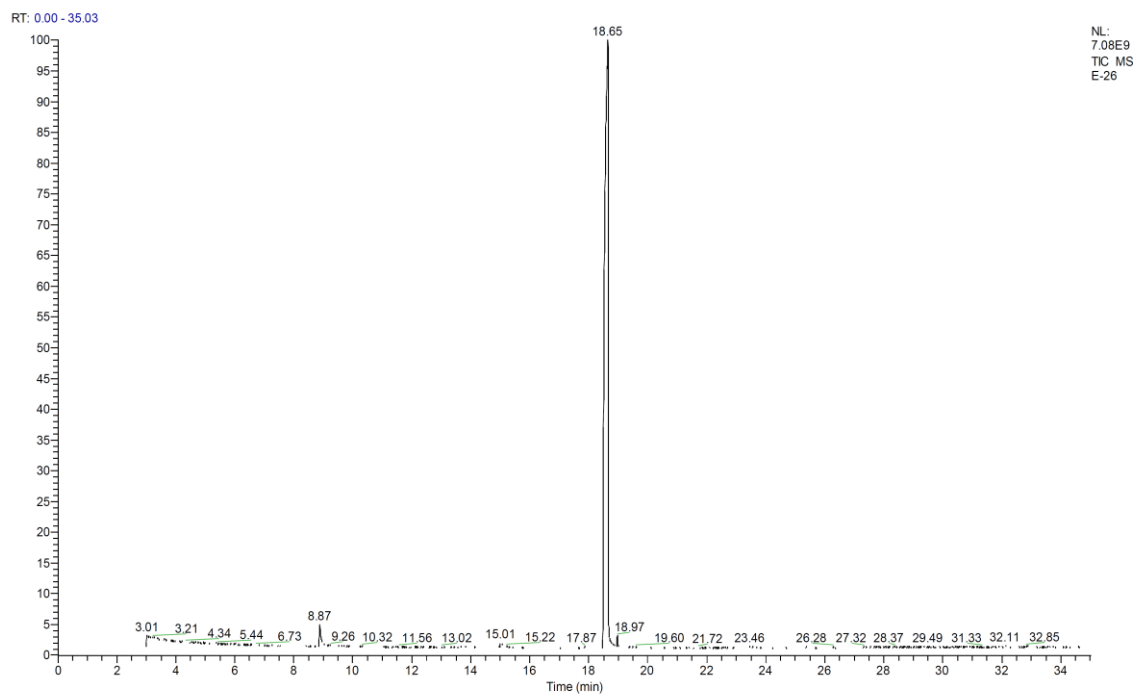

Figure S17. Gas chromatogram of purified 2-(benzylamino)pyrimidine

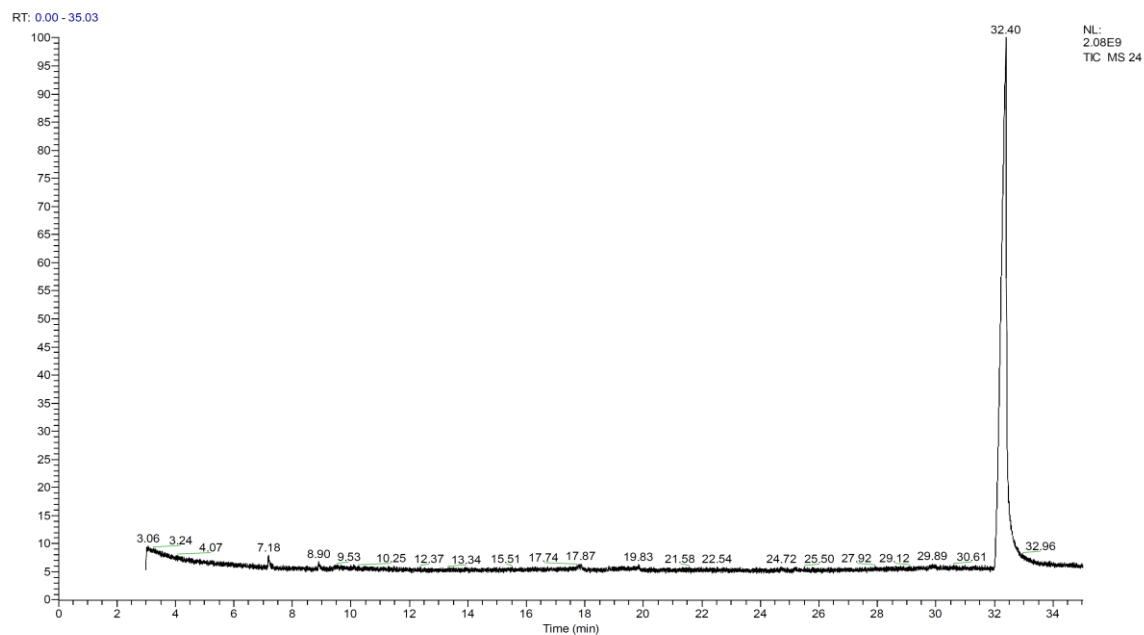

Figure S18. Gas chromatogram of purified (1H-benzoimidazol-2-yl)phenylamine



Iridium/Graphene Nanostructured Catalyst for the N-Alkylation of Amines to Synthesize Nitrogen-containing Derivatives and Heterocyclic Compounds in Green Process

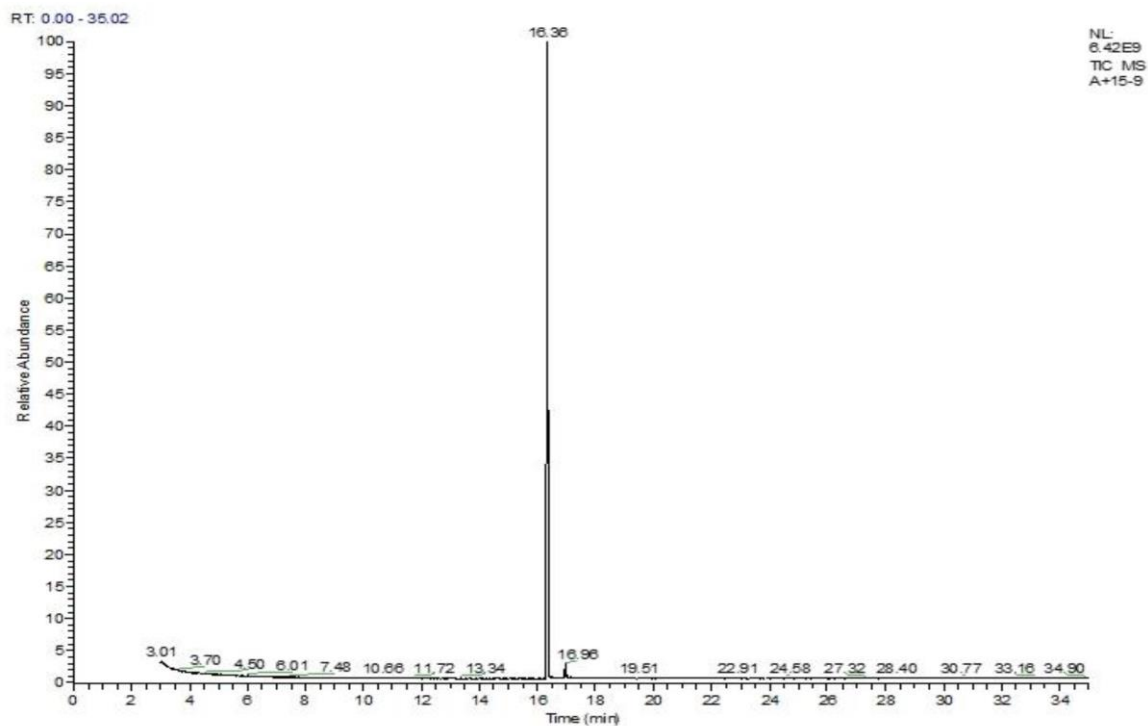

**Figure S19.** Gas chromatogram of purified N-methyl-N-phenyl-benzenemethanamine

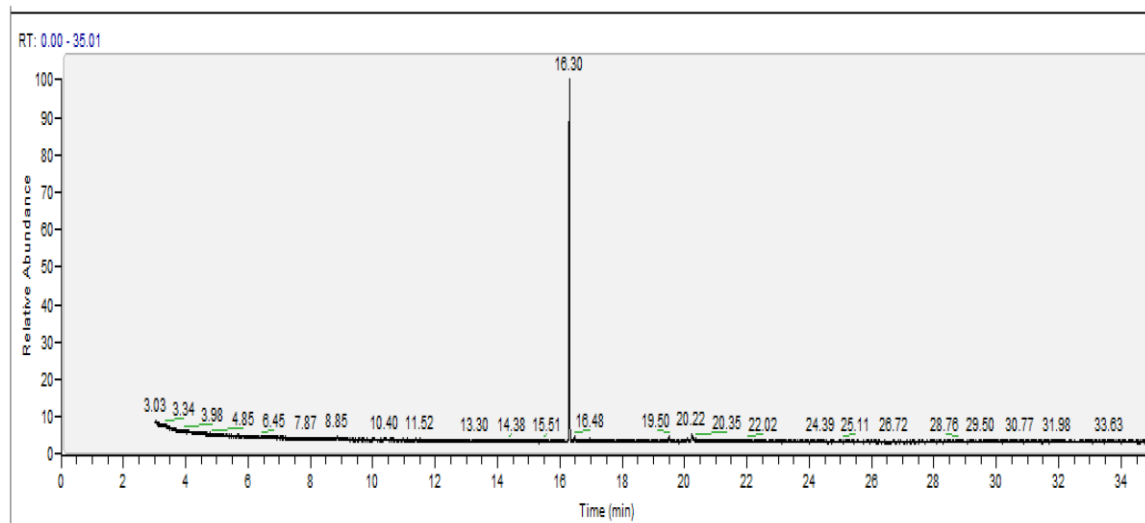

**Figure S20.** Gas chromatogram of purified N-benzyl-N-(4-chloro-benzyl)-aniline

Iridium/Graphene Nanostructured Catalyst for the N-Alkylation of Amines to Synthesize Nitrogen-containing Derivatives and Heterocyclic Compounds in Green Process

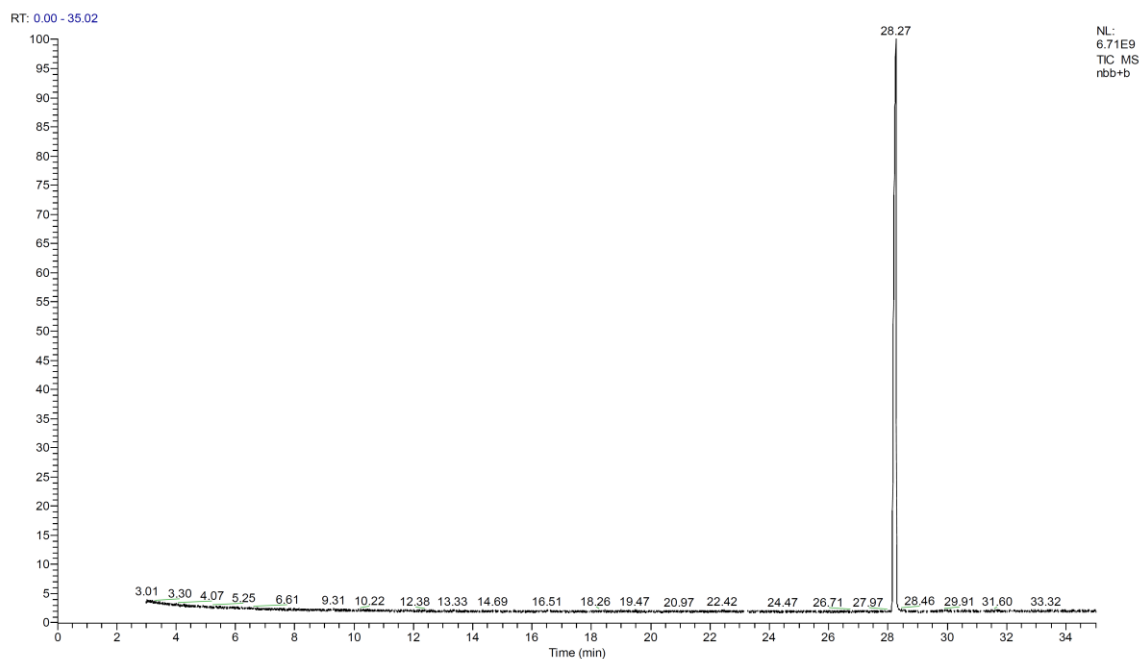

Figure S21. Gas chromatogram of purified N,N-dibenzylaniline

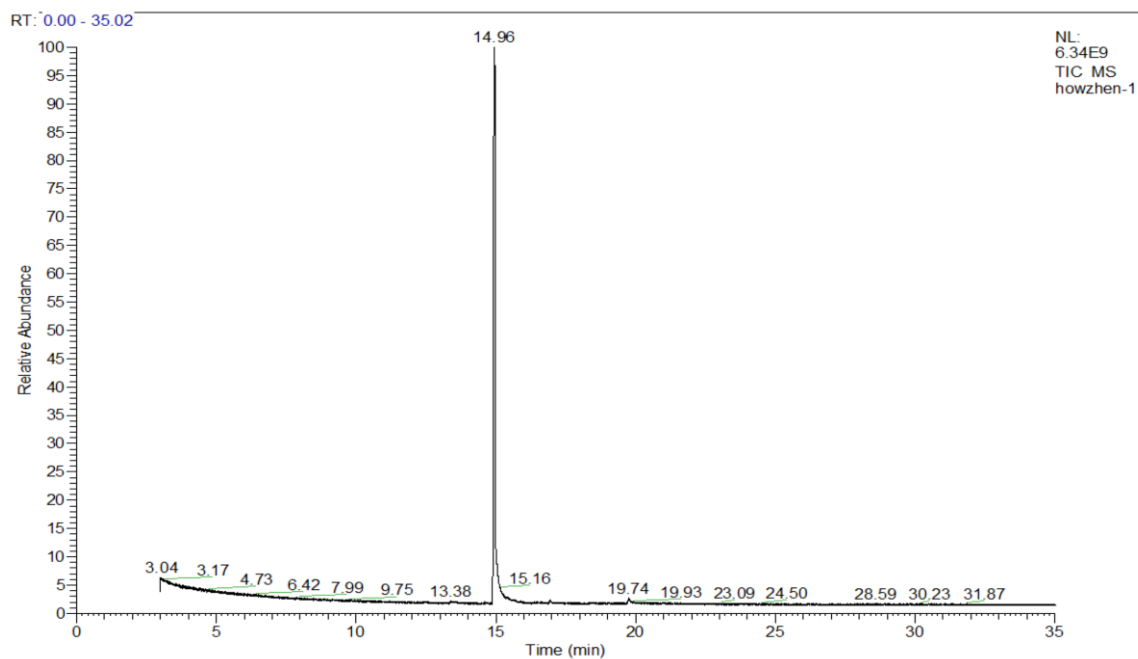

Figure S22. Gas chromatogram of purified N-phenylpyrrolidine

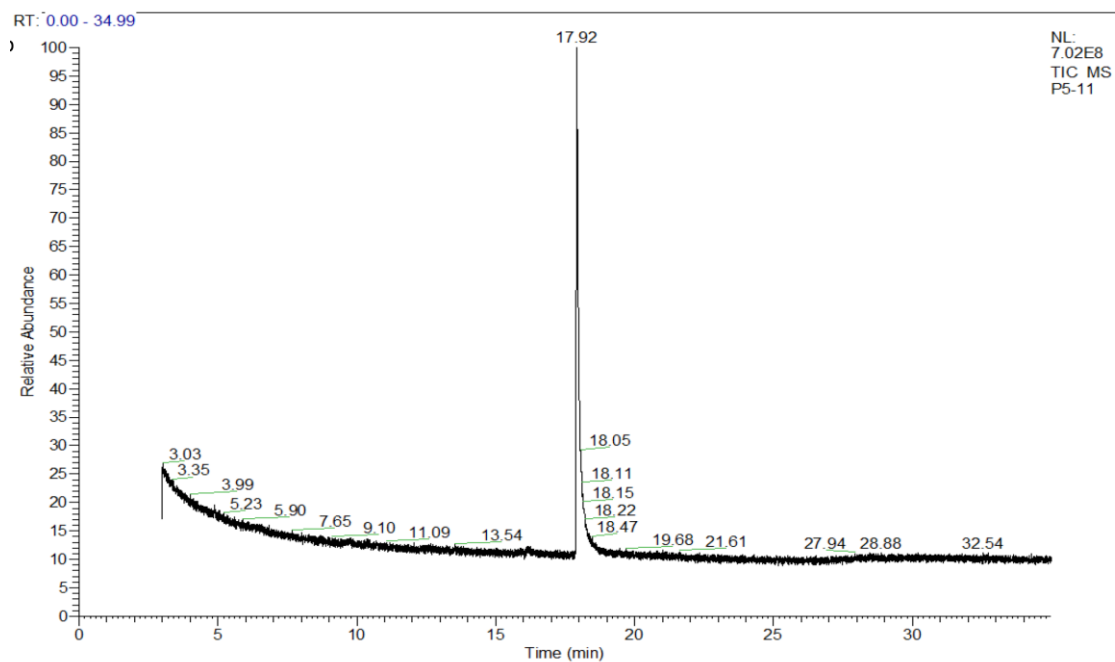

Figure S23. Gas chromatogram of purified N-(4-chlorophenyl) pyrrolidine

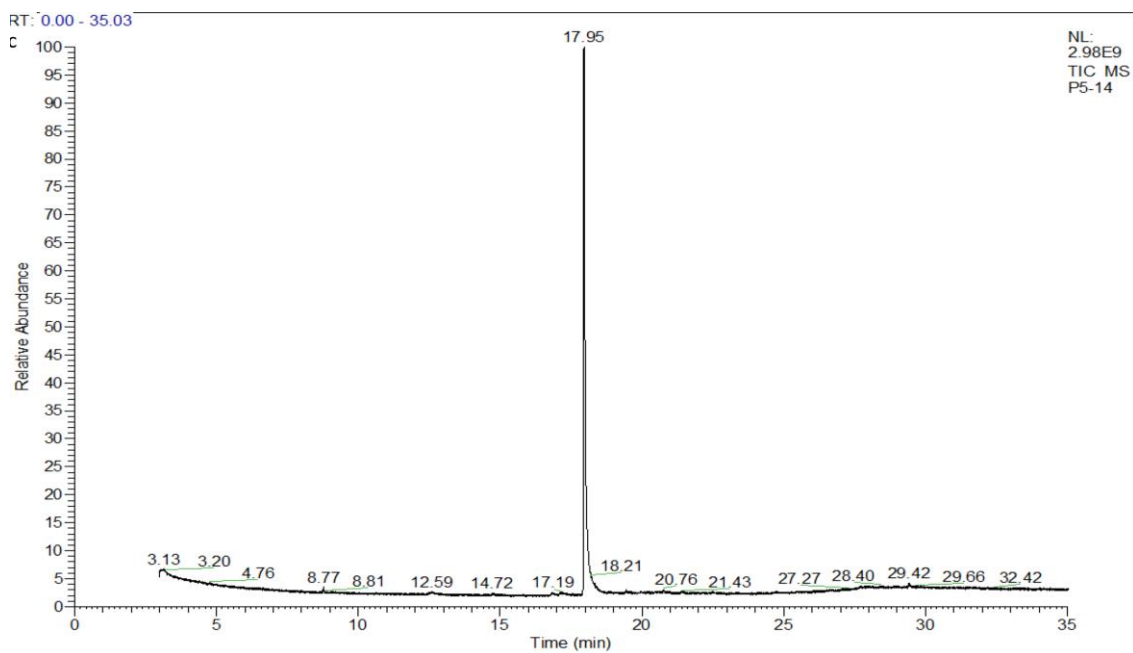

Figure S24. Gas chromatogram of purified N-(4-methoxyphenyl) pyrrolidine

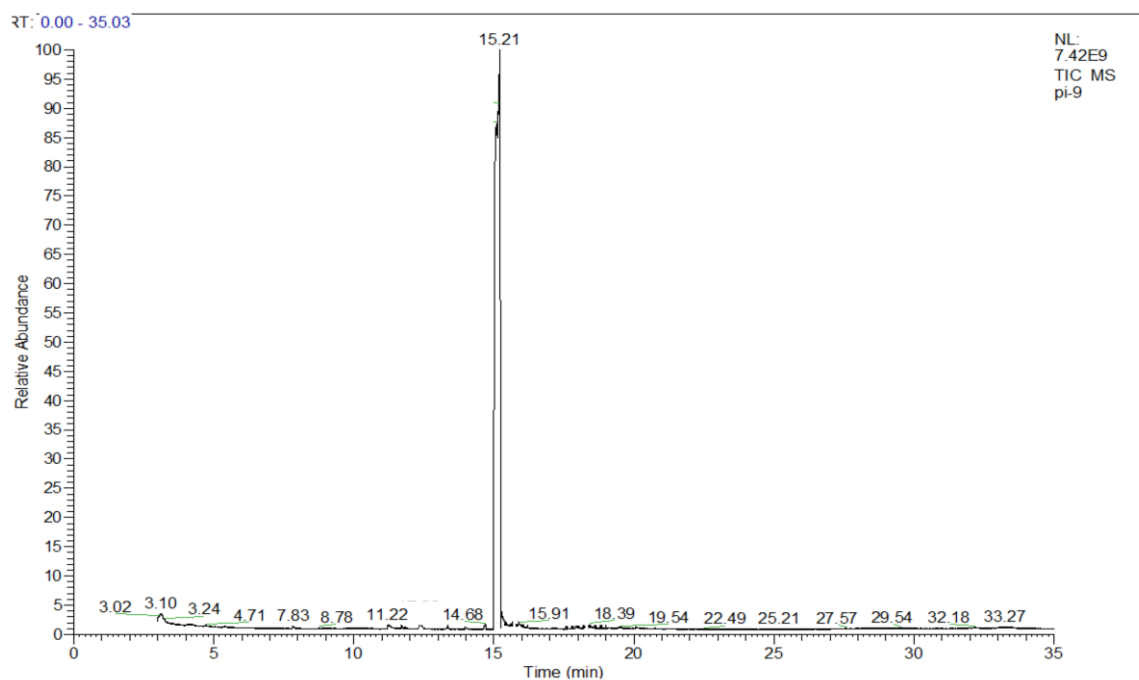

Figure S25. Gas chromatogram of purified N-phenylpiperidine

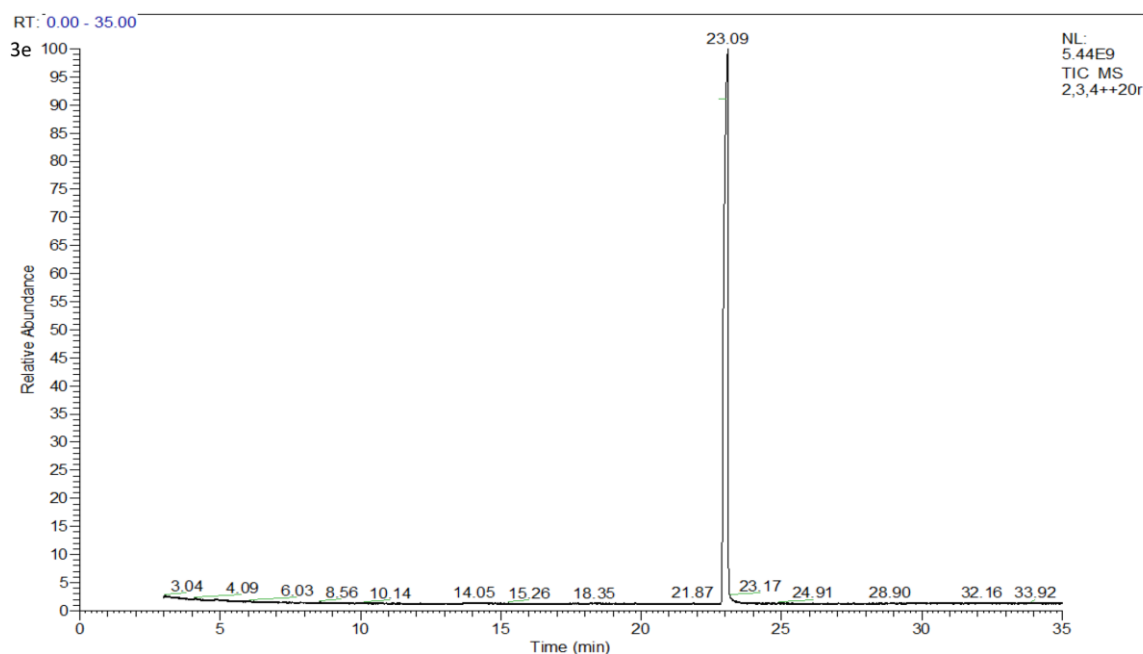

Figure S26. Gas chromatogram of purified N-(4-methoxyphenyl) piperidine

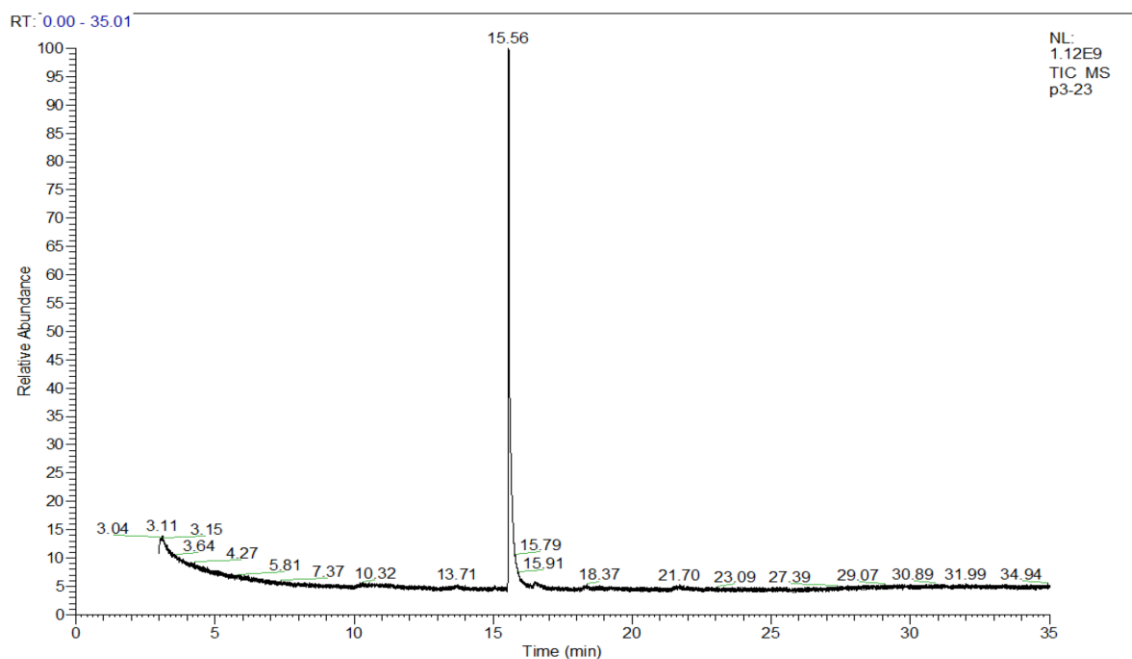

Figure S27. Gas chromatogram of purified 1-(piperidine-1-yl)pyridine

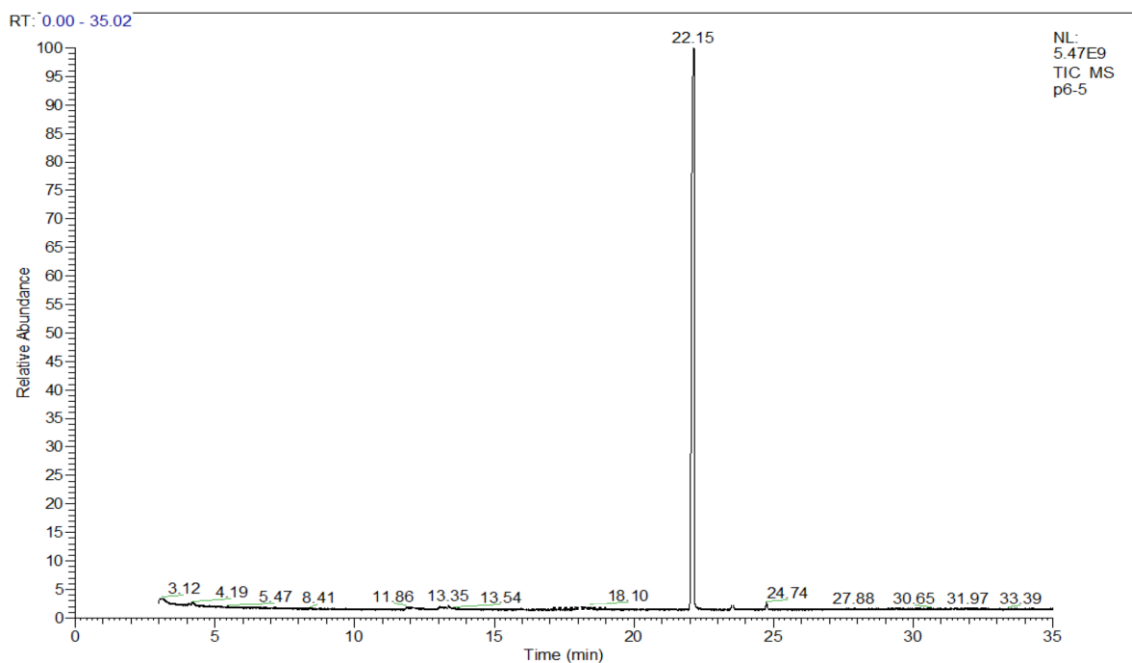

Figure S28. Gas chromatogram of purified 1-methyl-4-(pyridin-2-yl)piperazine

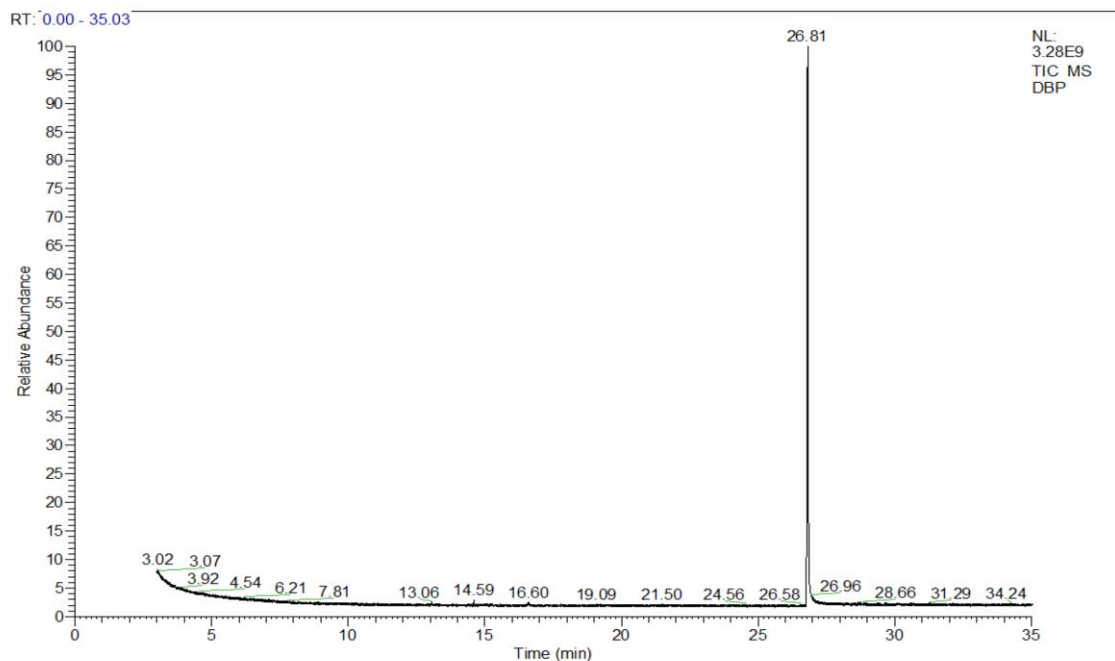

Figure S29. Gas chromatogram of purified benzylpiperazine

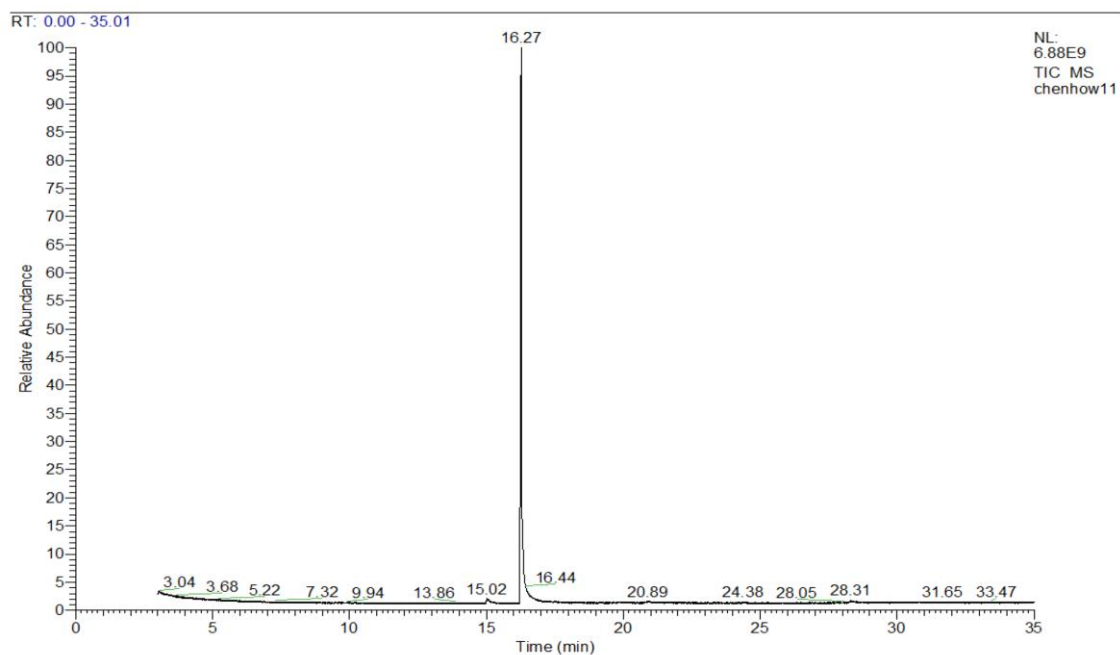

Figure S30. Gas chromatogram of purified 1-methyl-4-phenyl piperazine

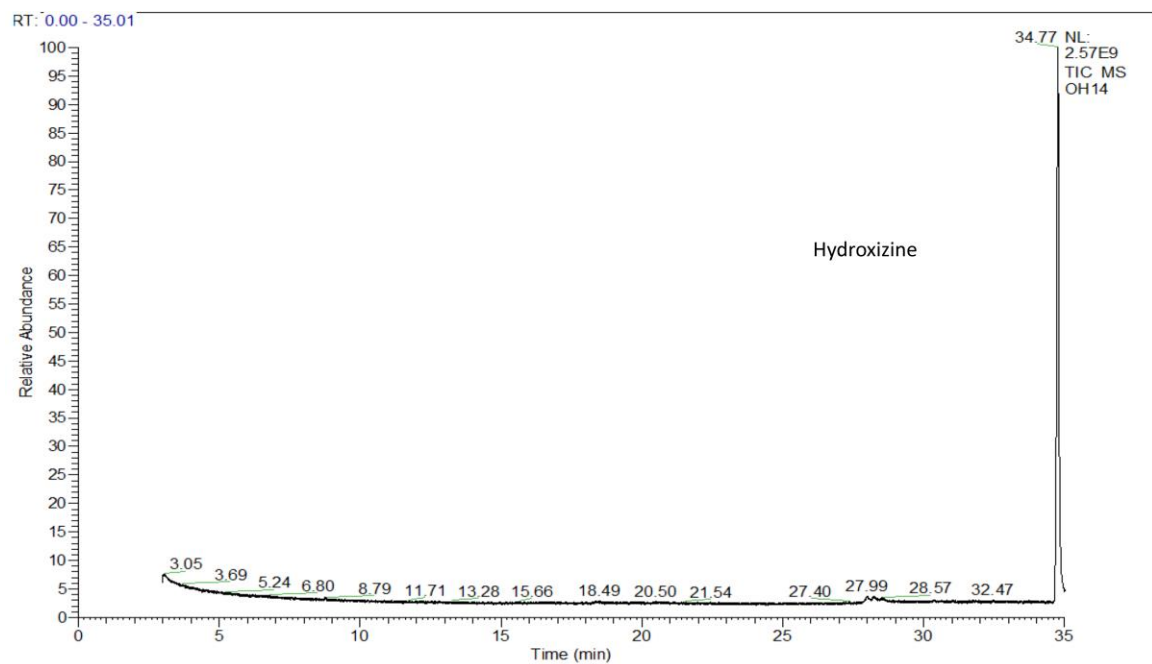

Figure S31. Gas chromatogram of purified of hydroxyzine

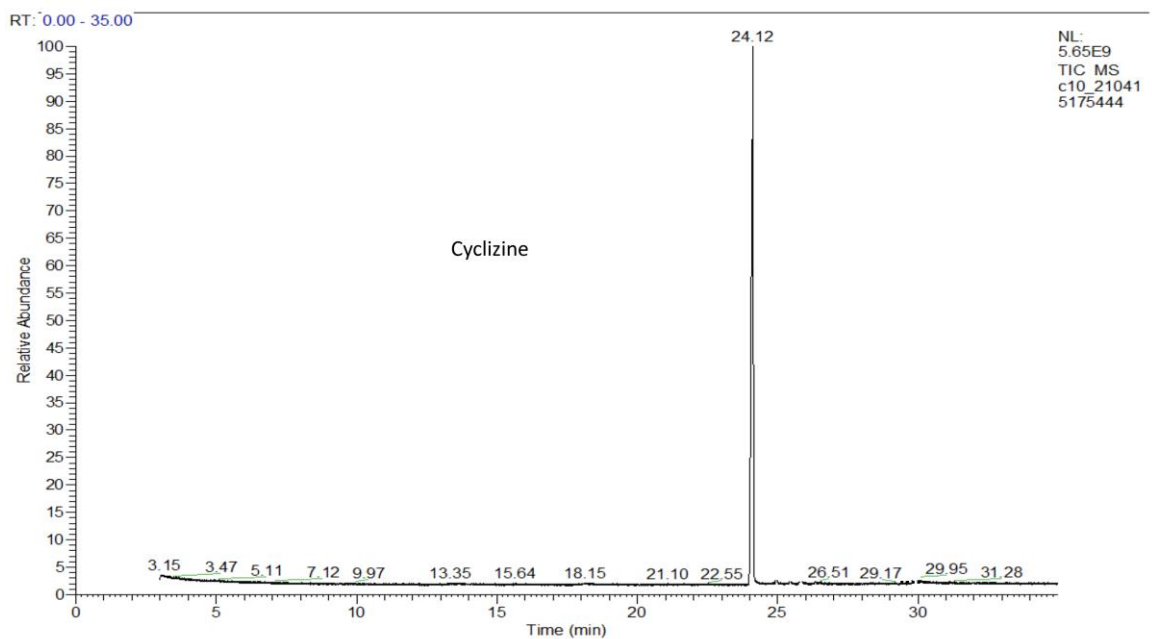

Figure S32. Gas chromatogram of purified cyclizine

### III. $^1\text{H}$ NMR Spectra of Compounds

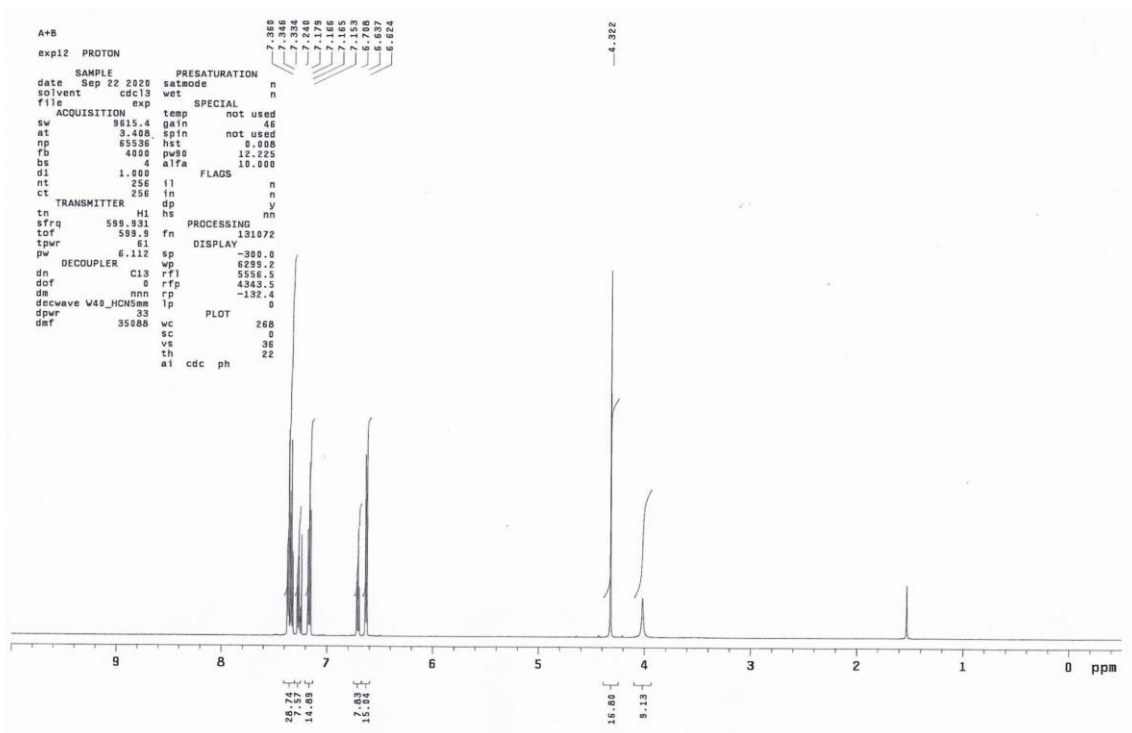

Figure S33.  $^1\text{H}$ NMR Spectrum of N-benzylaniline

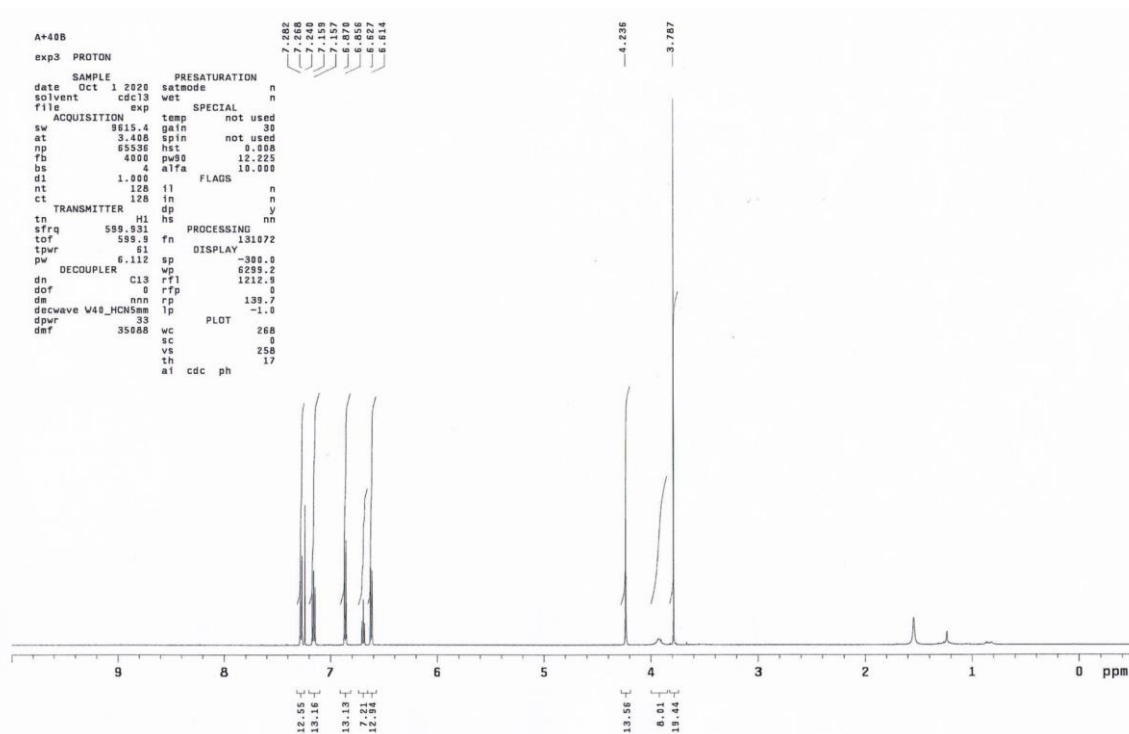

Figure S34.  $^1\text{H}$ NMR Spectrum of N-(4-methoxybenzyl)aniline



Iridium/Graphene Nanostructured Catalyst for the N-Alkylation of Amines to Synthesize Nitrogen-containing Derivatives and Heterocyclic Compounds in Green Process

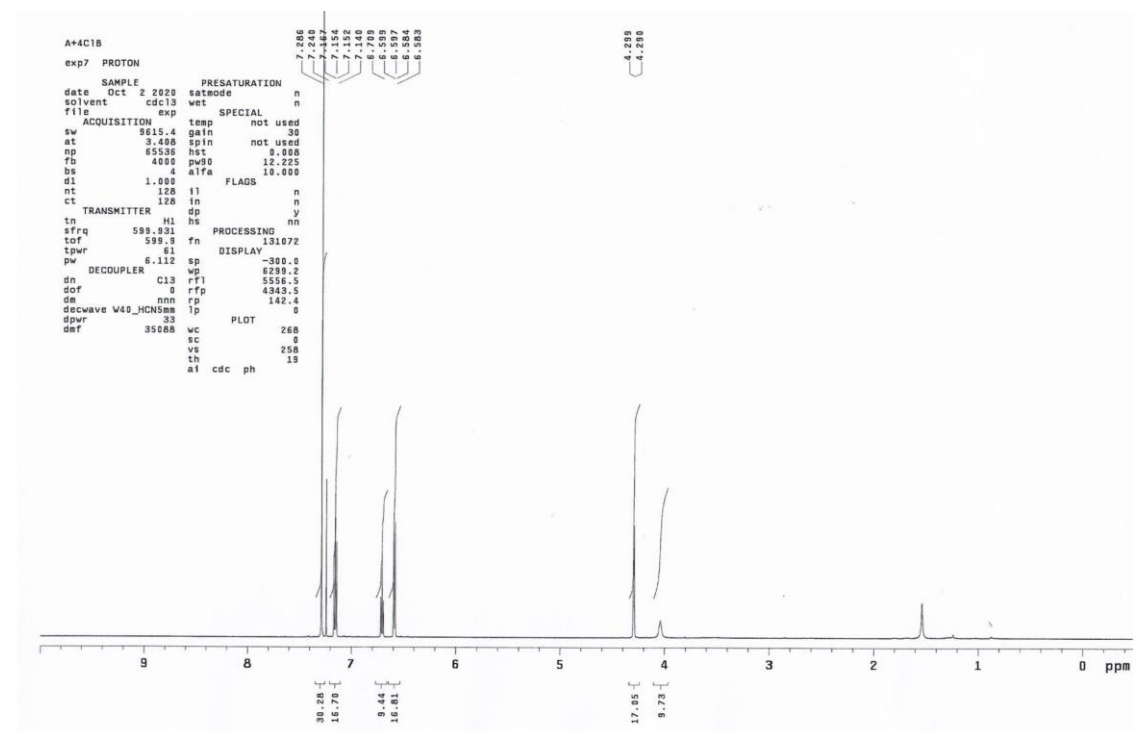

Figure S35. <sup>1</sup>H NMR Spectrum of N-(p-chlorobenzyl)aniline

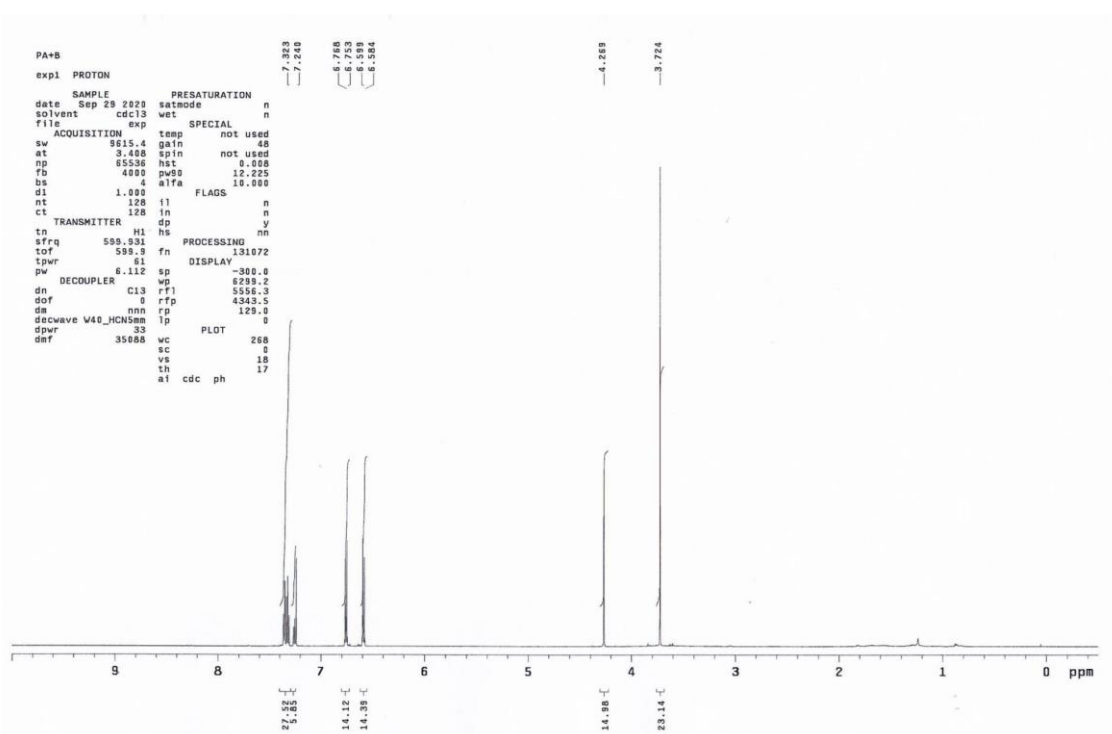

Figure S36. <sup>1</sup>H NMR Spectrum of benzyl(4-methoxyphenyl)amine

Iridium/Graphene Nanostructured Catalyst for the N-Alkylation of Amines to Synthesize Nitrogen-containing Derivatives and Heterocyclic Compounds in Green Process

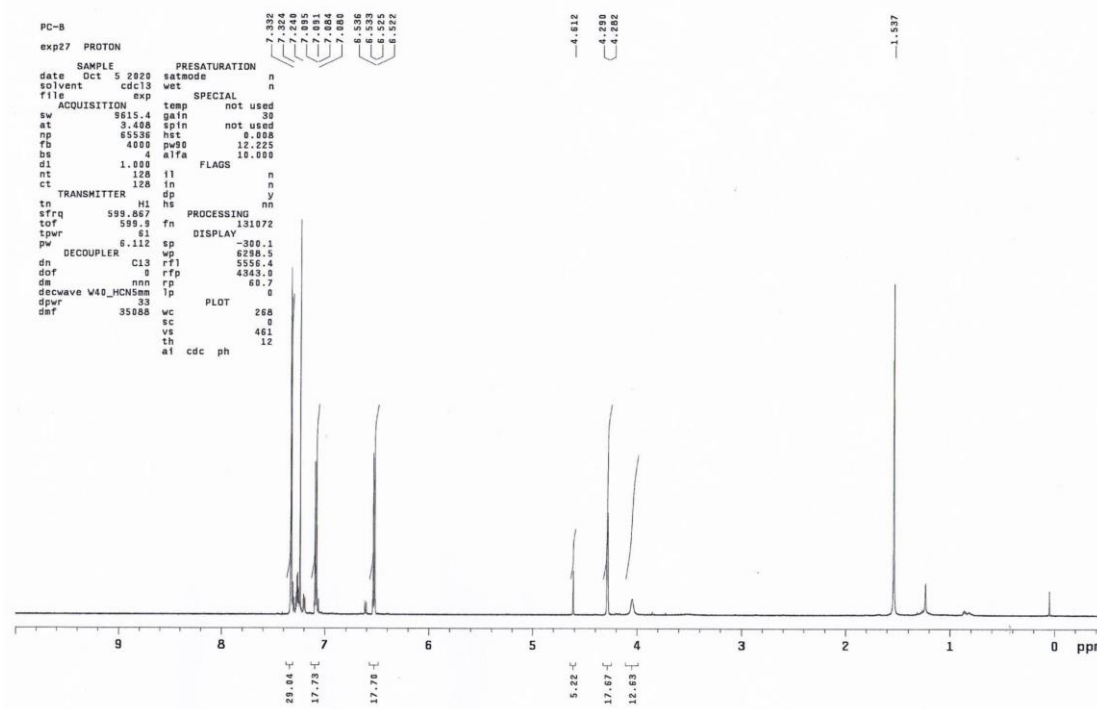

Figure S37. <sup>1</sup>H NMR Spectrum of N-(4-chlorophenyl)benzylamine

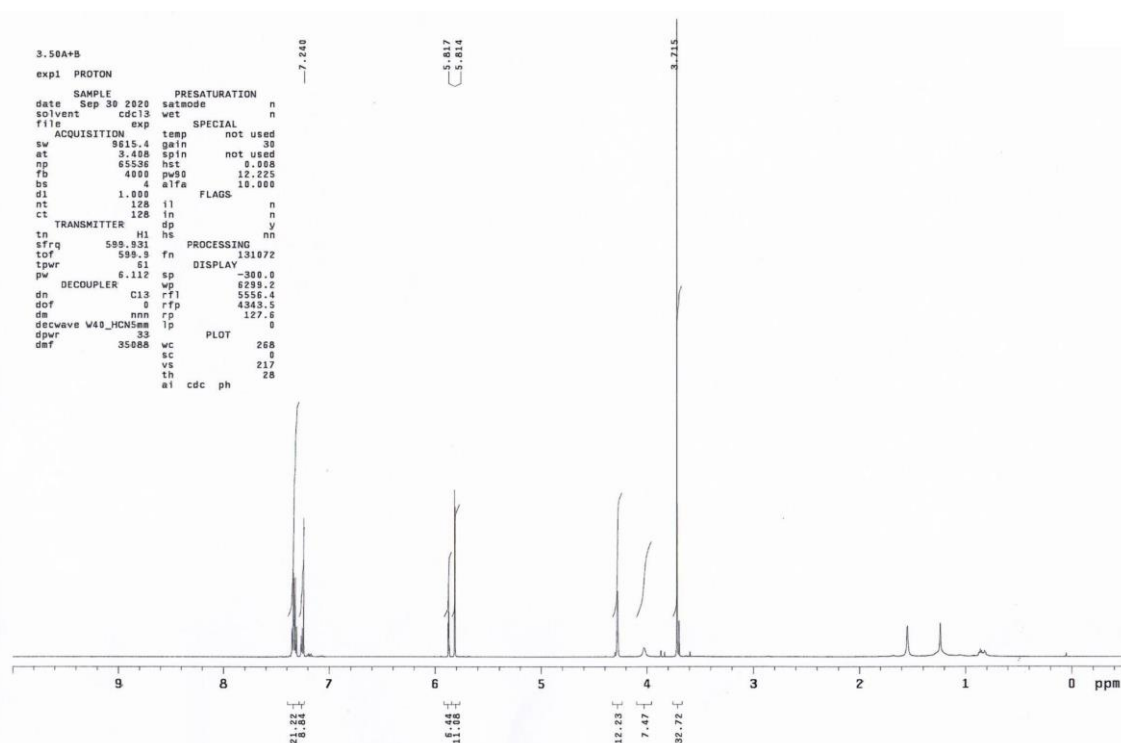

Figure S38. <sup>1</sup>H NMR Spectrum of N-benzyl-3,5-dimethoxyaniline

Iridium/Graphene Nanostructured Catalyst for the N-Alkylation of Amines to Synthesize Nitrogen-containing Derivatives and Heterocyclic Compounds in Green Process

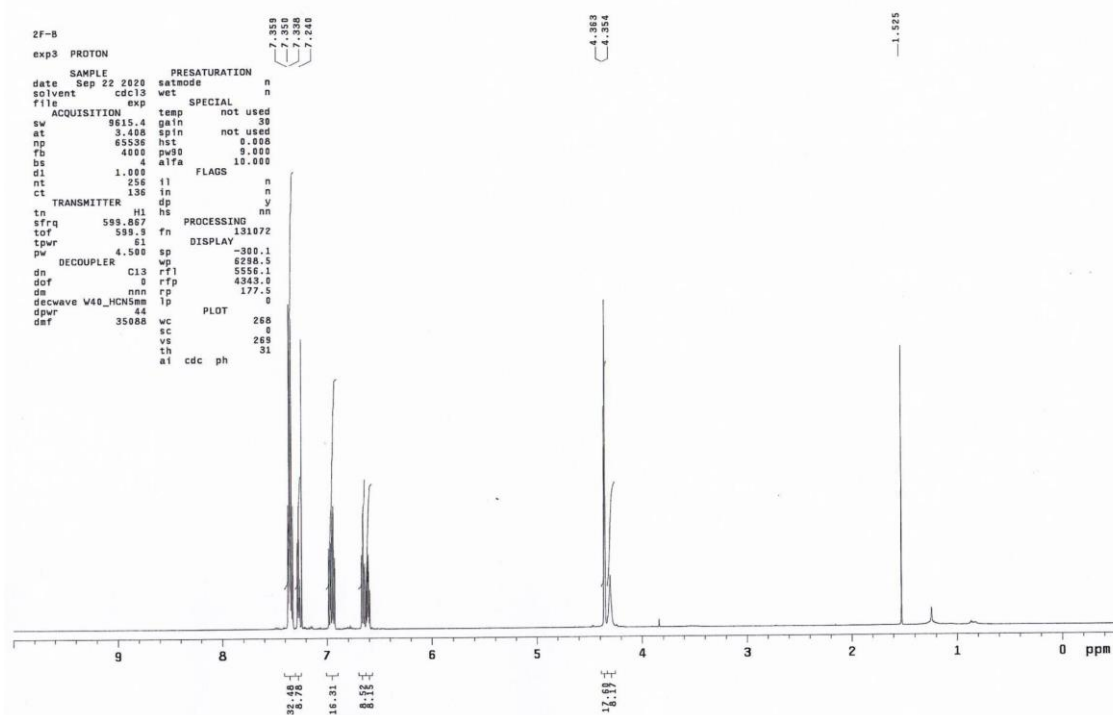

Figure S39. <sup>1</sup>HNMR Spectrum of N-benzyl-(2-fluorophenyl)amine

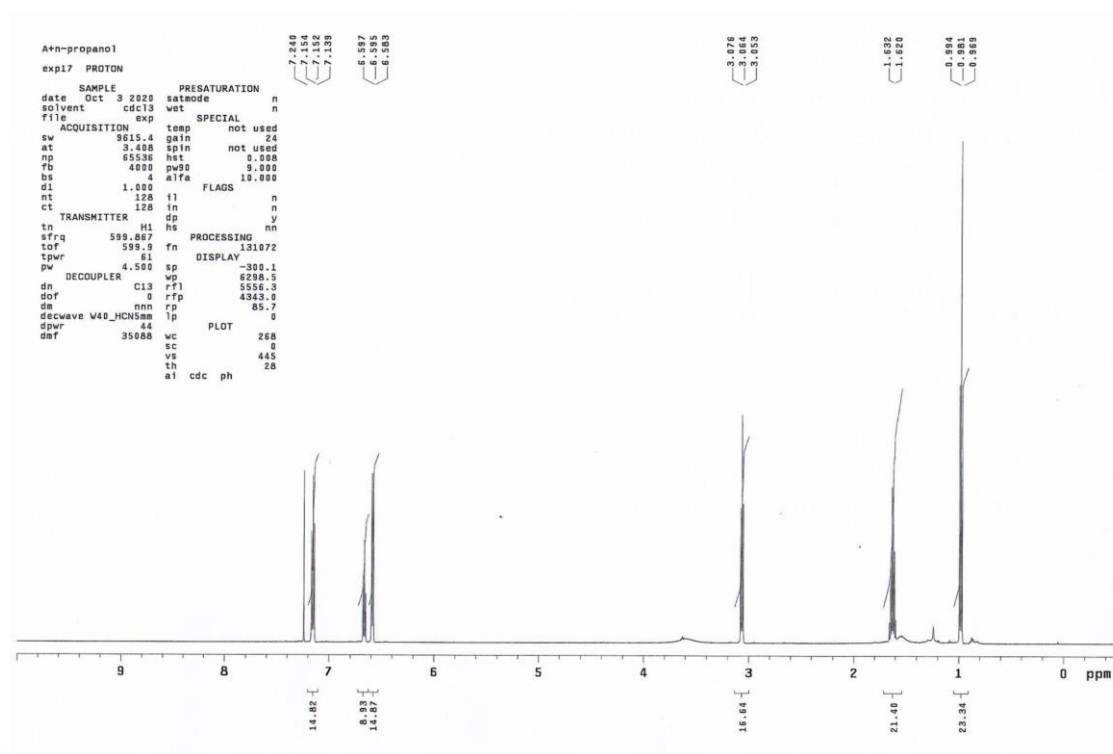

Figure S40. <sup>1</sup>HNMR Spectrum of N-propylaniline

Iridium/Graphene Nanostructured Catalyst for the N-Alkylation of Amines to Synthesize Nitrogen-containing Derivatives and Heterocyclic Compounds in Green Process

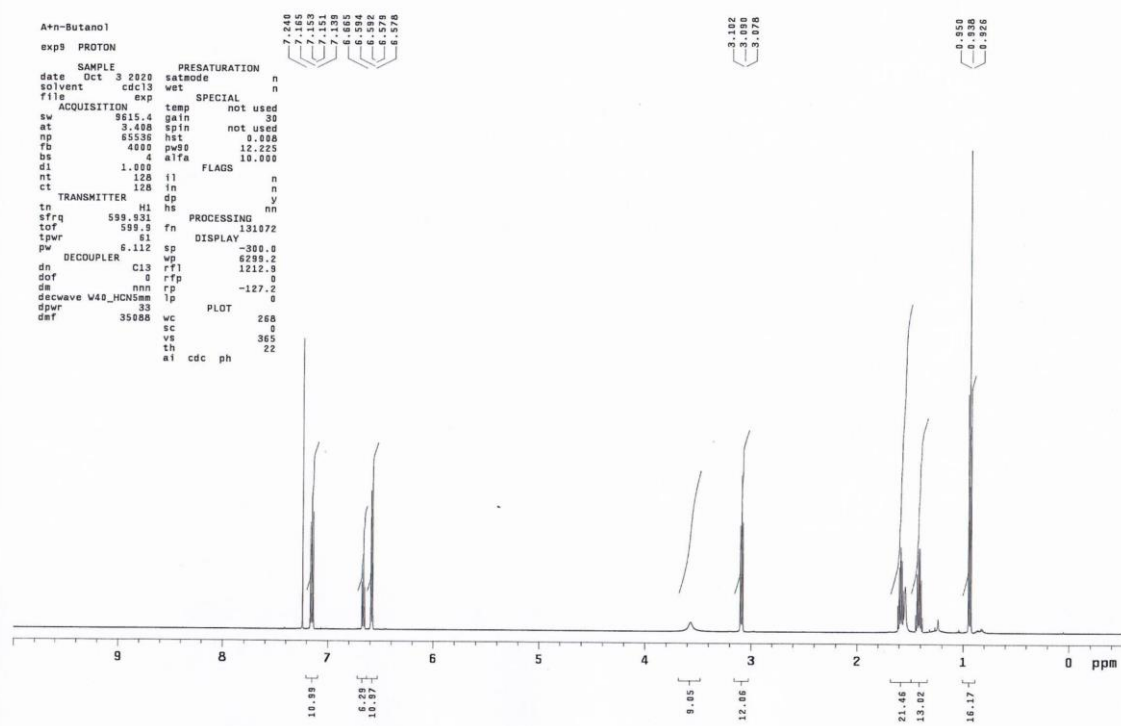

Figure S41. <sup>1</sup>H NMR Spectrum of N-(n-butyl)aniline

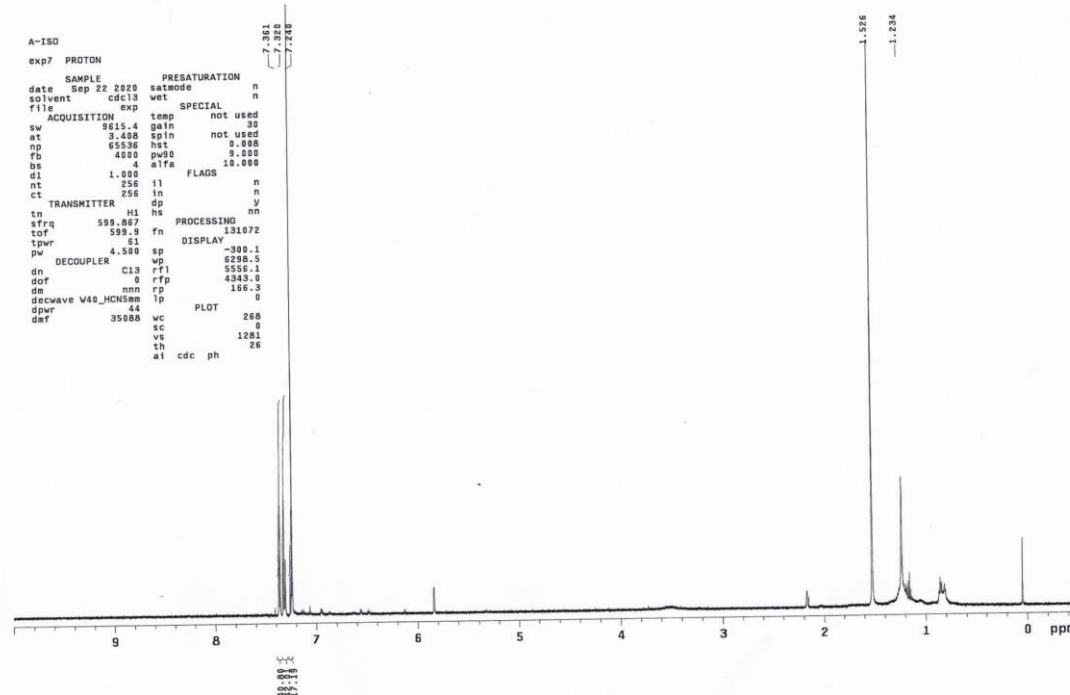

Figure S42. <sup>1</sup>H NMR Spectrum of N-isopropylaniline





Iridium/Graphene Nanostructured Catalyst for the N-Alkylation of Amines to Synthesize Nitrogen-containing Derivatives and Heterocyclic Compounds in Green Process

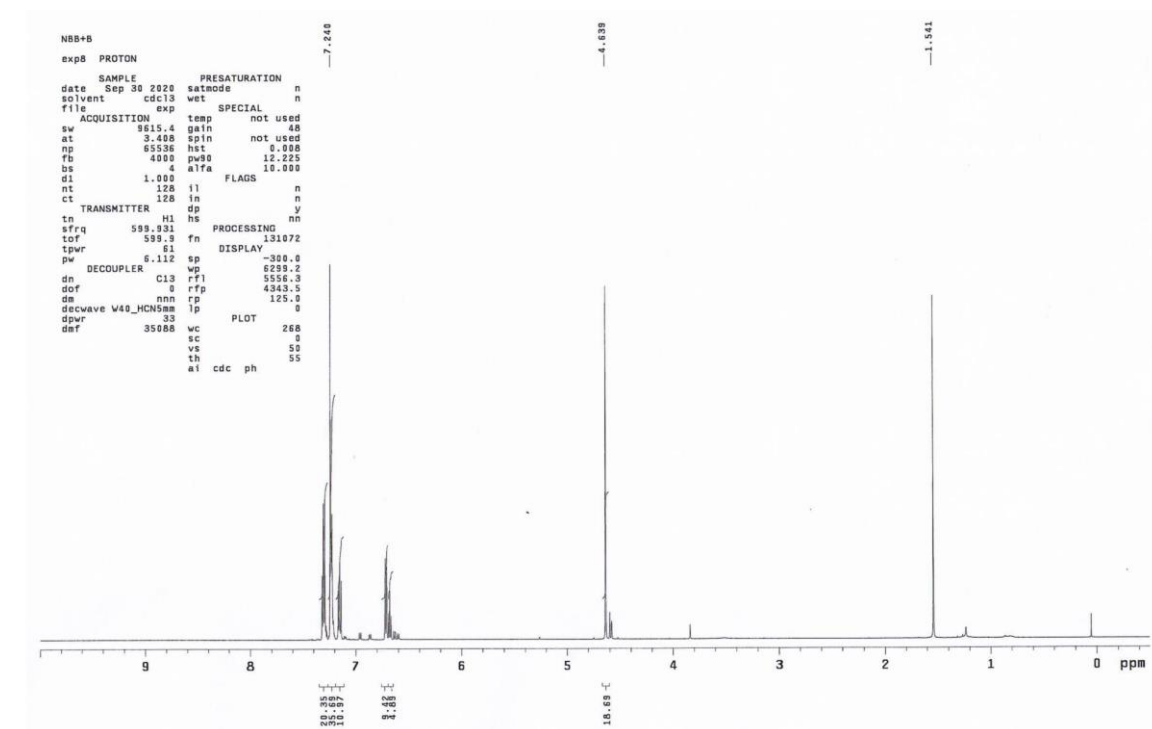

Figure S47. <sup>1</sup>H NMR Spectrum of N,N-dibenzylaniline

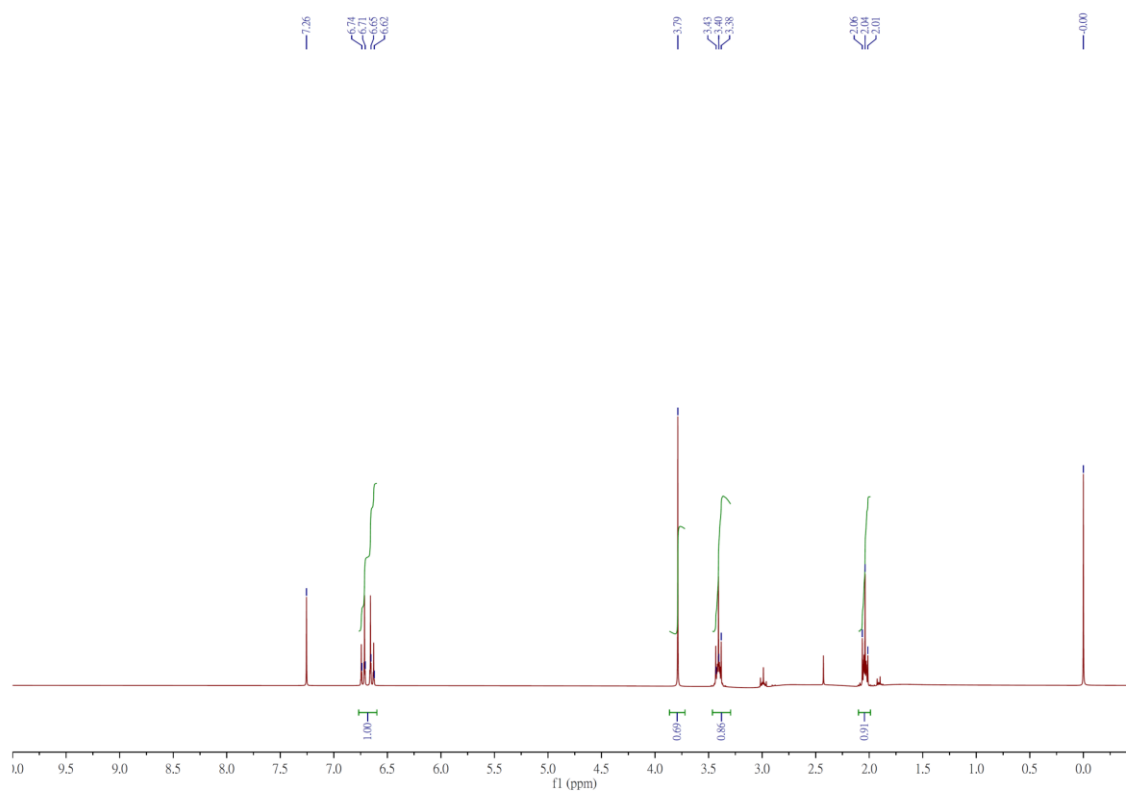

Figure S48. <sup>1</sup>H NMR Spectrum of N-(4-methoxyphenyl) pyrrolidine

Iridium/Graphene Nanostructured Catalyst for the N-Alkylation of Amines to Synthesize Nitrogen-containing Derivatives and Heterocyclic Compounds in Green Process

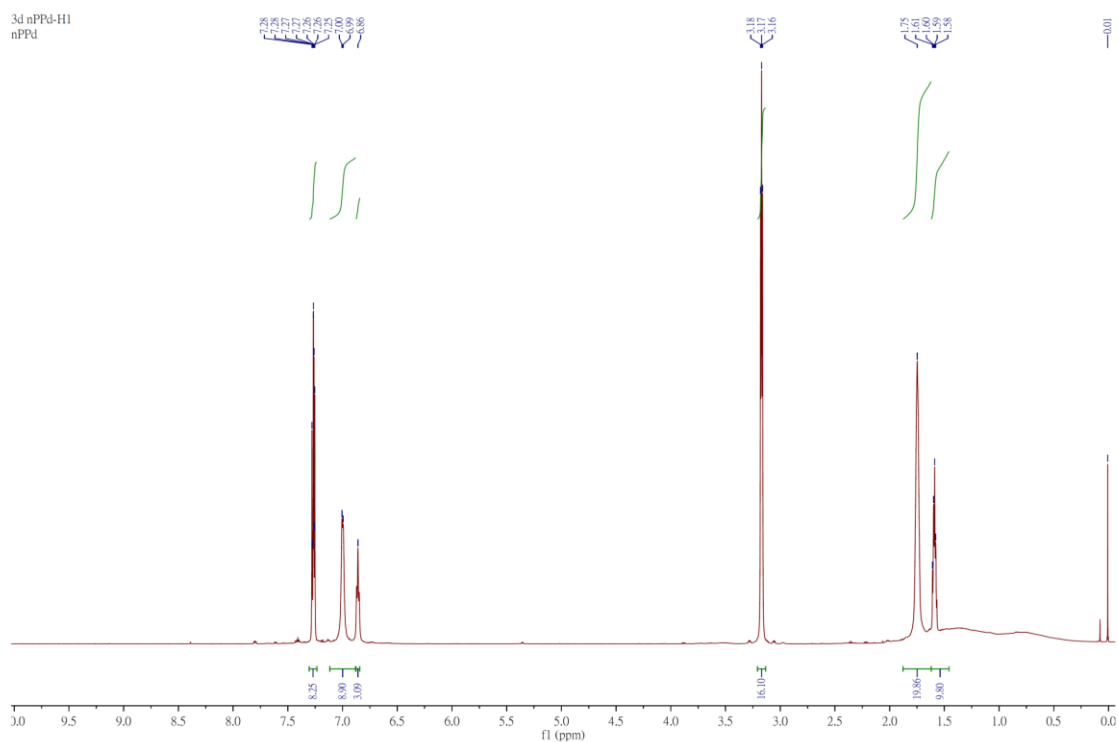

Figure S49. <sup>1</sup>H NMR Spectrum of N-phenylpiperidine

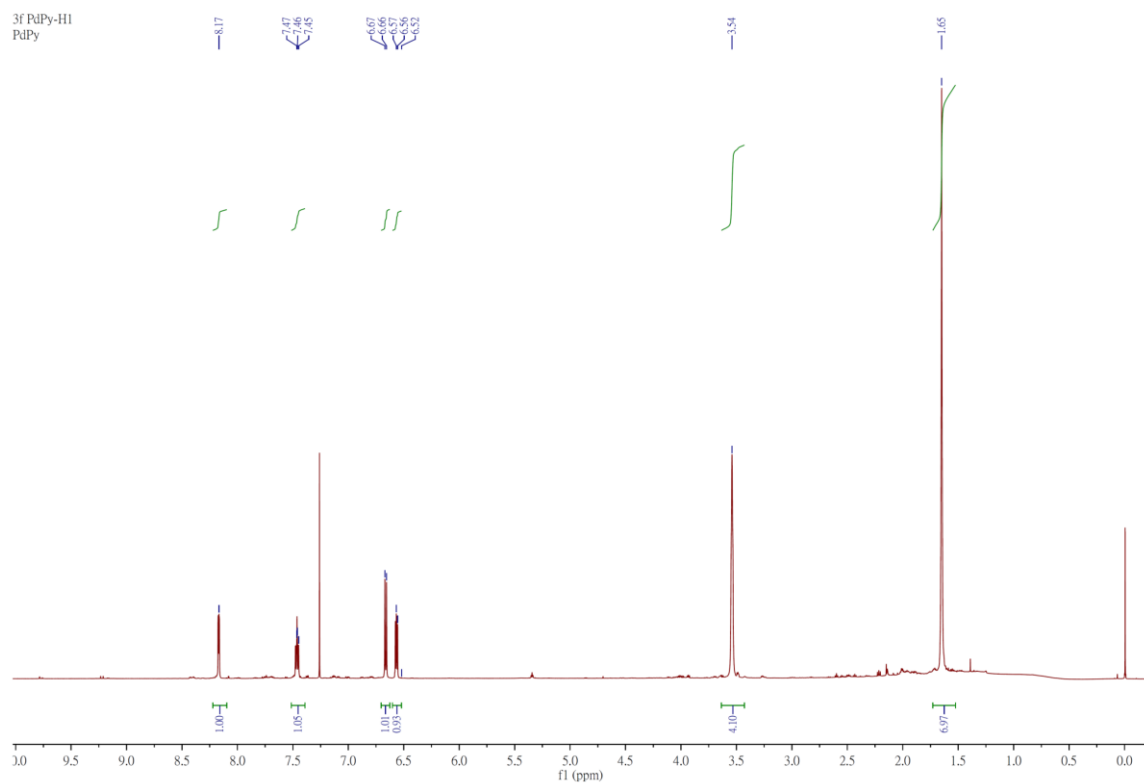

Figure S50. <sup>1</sup>H NMR Spectrum of 1-(piperidine-1-yl)pyridine



Iridium/Graphene Nanostructured Catalyst for the N-Alkylation of Amines to Synthesize Nitrogen-containing Derivatives and Heterocyclic Compounds in Green Process

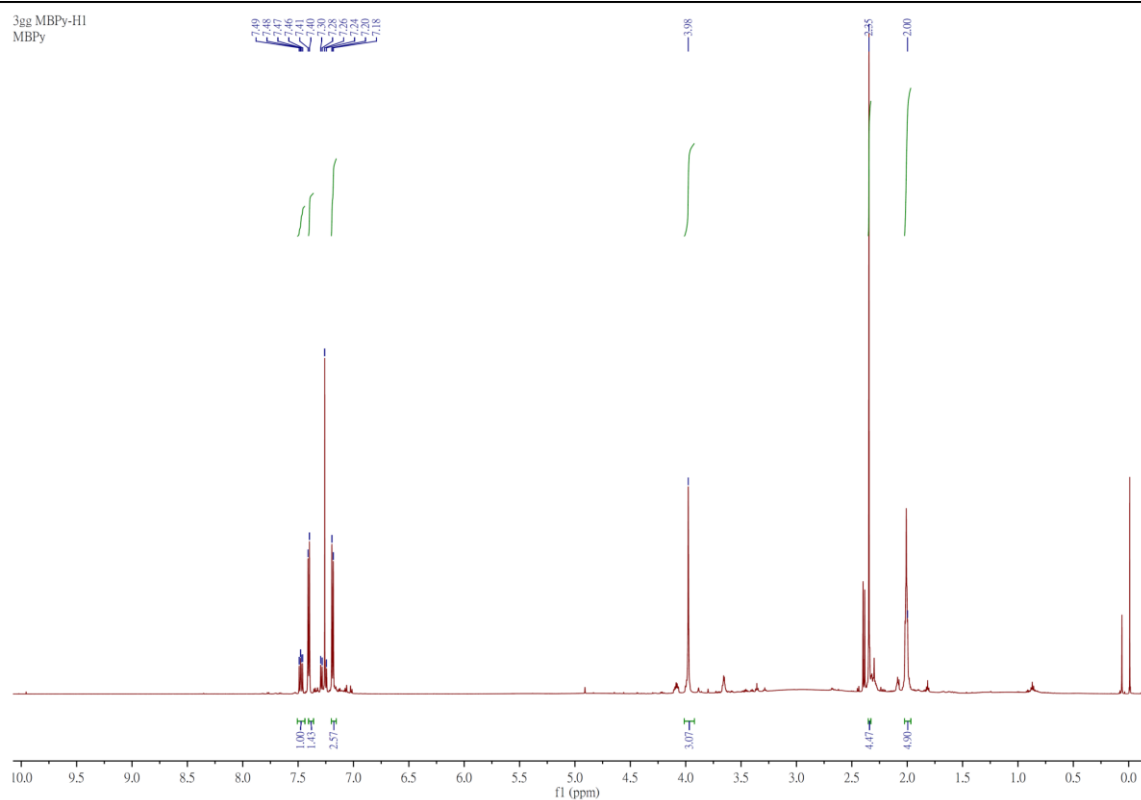

Figure S51. <sup>1</sup>HNMR Spectrum of 1-methyl-4-(pyridin-2-yl) piperazine

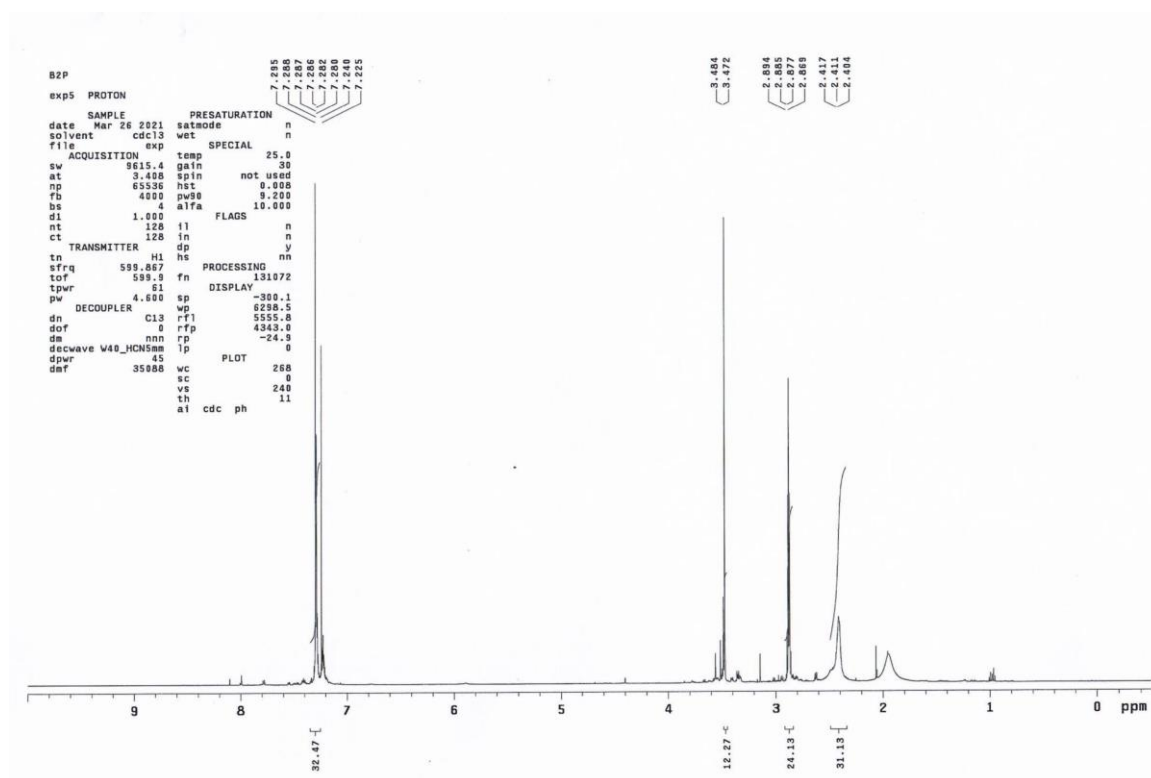

Figure S52. <sup>1</sup>HNMR Spectrum of Benzylpiperazine

Iridium/Graphene Nanostructured Catalyst for the N-Alkylation of Amines to Synthesize Nitrogen-containing Derivatives and Heterocyclic Compounds in Green Process

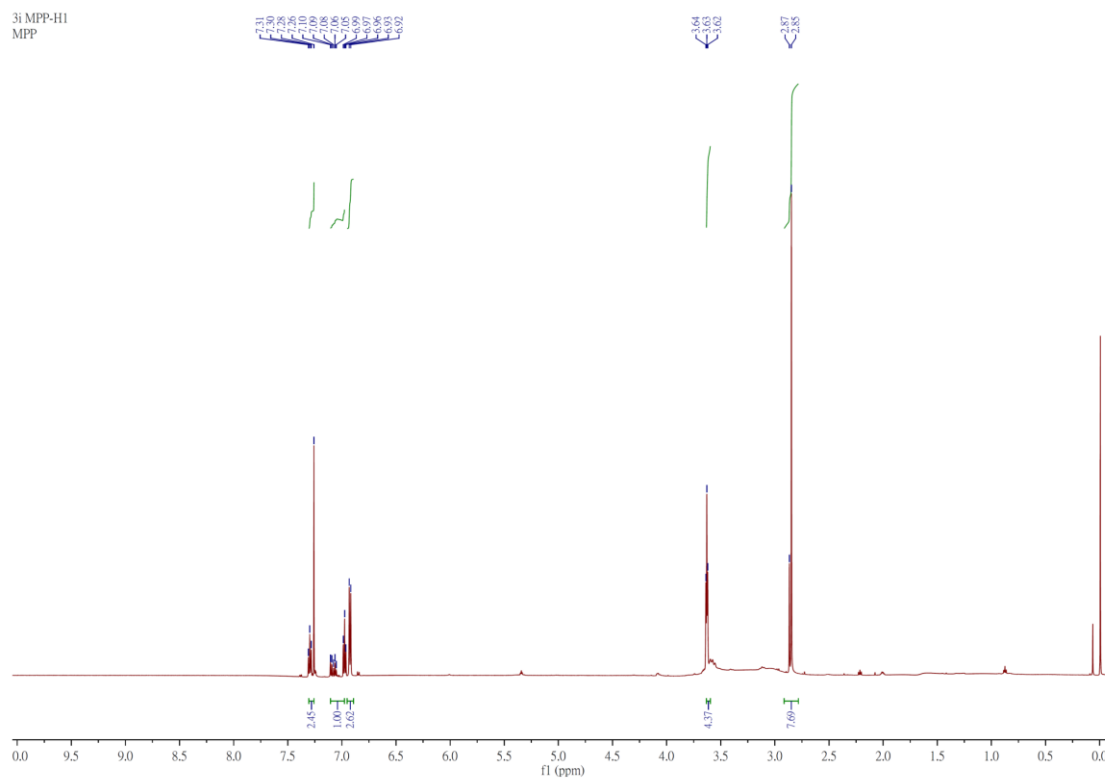

Figure S53.  $^1\text{H}$ NMR Spectrum of 1-methyl-4-phenyl piperazine

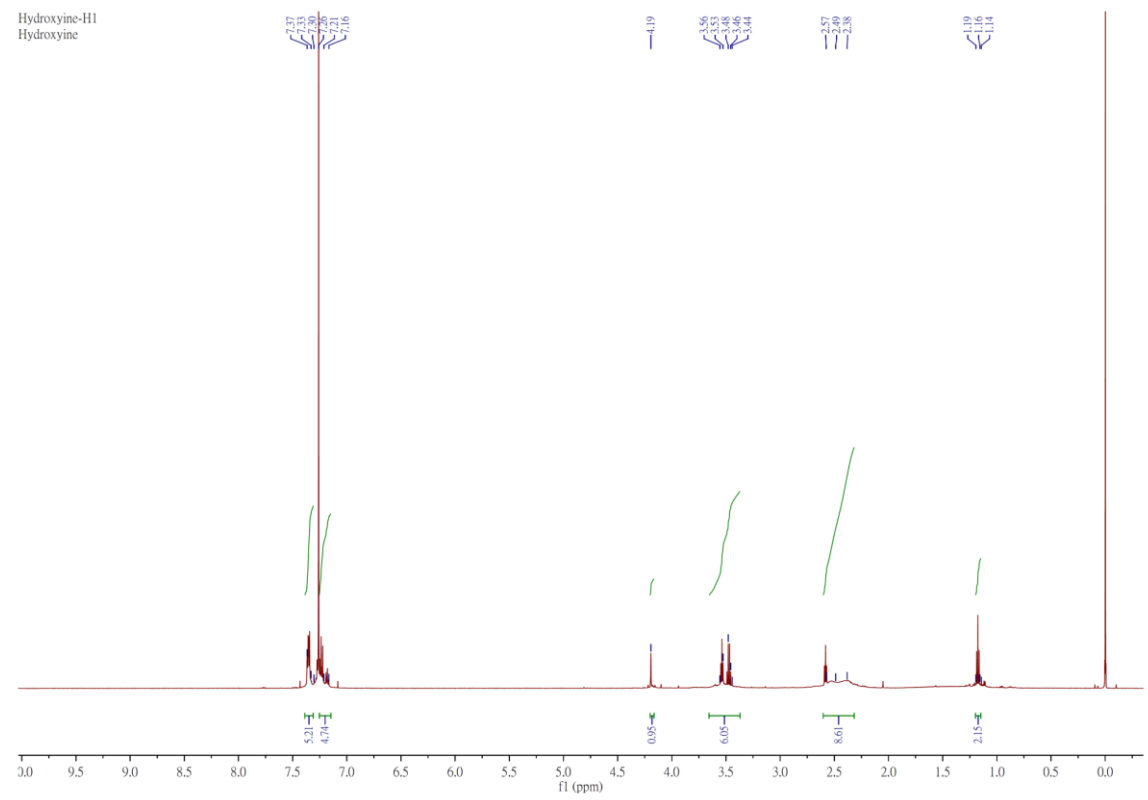

Figure S54.  $^1\text{H}$ NMR Spectrum of hydroxyzine

Iridium/Graphene Nanostructured Catalyst for the N-Alkylation of Amines to Synthesize Nitrogen-containing Derivatives and Heterocyclic Compounds in Green Process

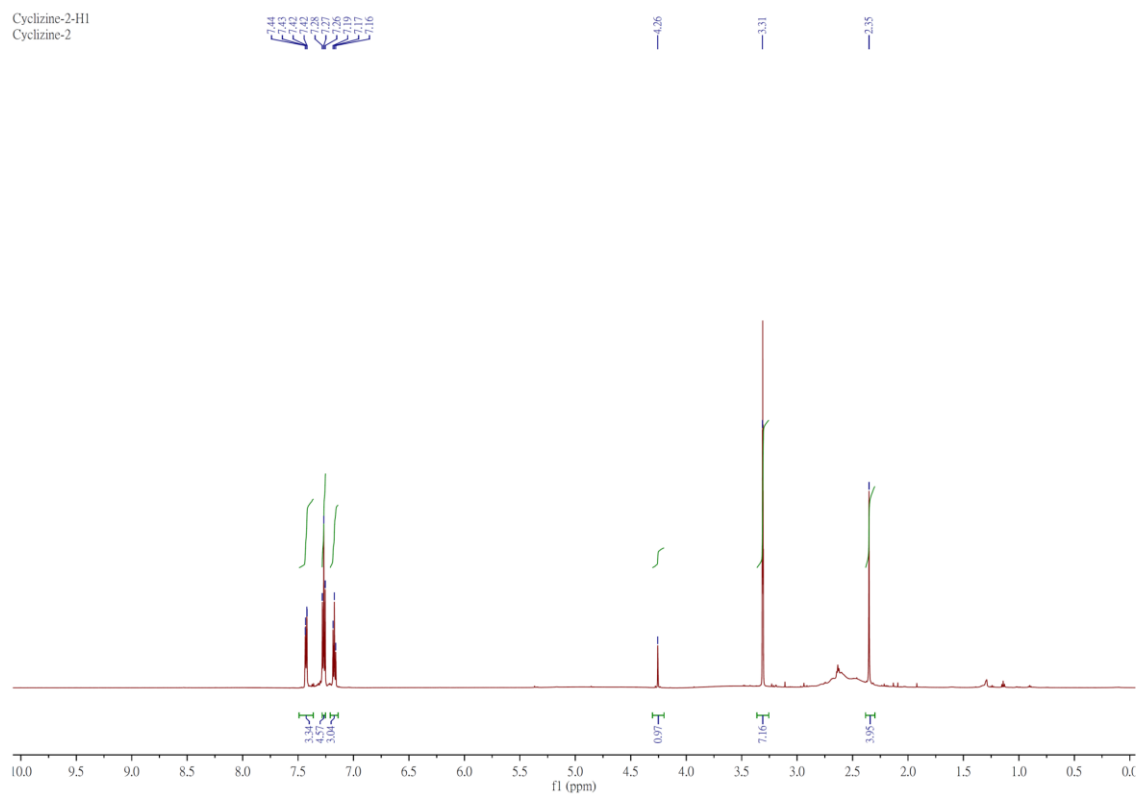

**Figure S55.**  $^1\text{H}$ NMR Spectrum of Cyclizine

#### IV. Compound Mass Spectra and Data

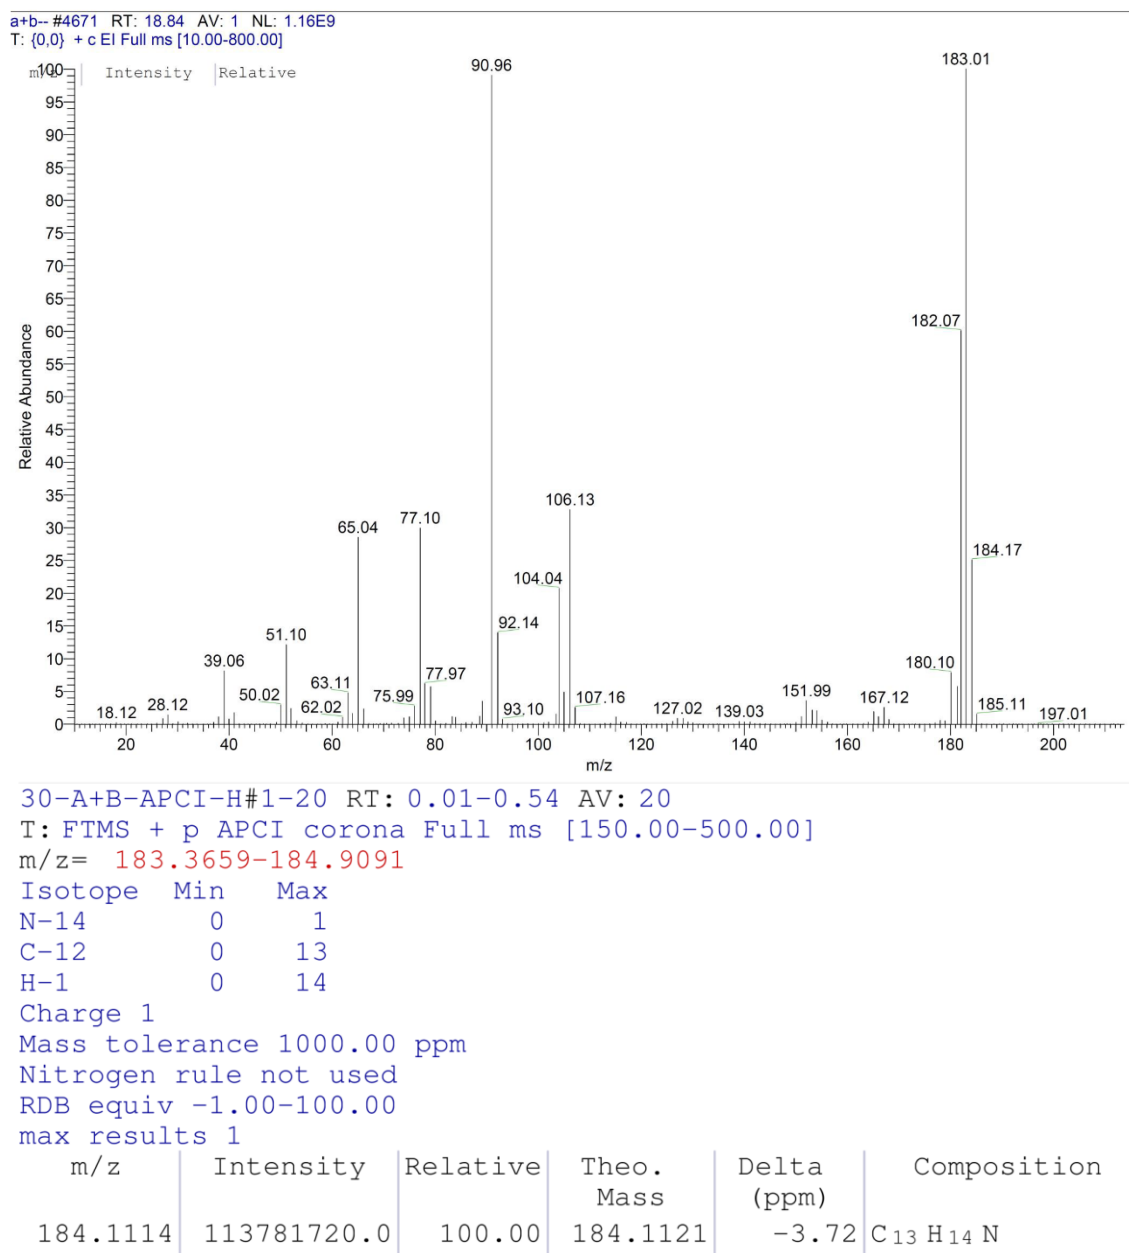

Figure S56. Mass spectrum and HMS data of N-benzylaniline

Iridium/Graphene Nanostructured Catalyst for the N-Alkylation of Amines to Synthesize Nitrogen-containing Derivatives and Heterocyclic Compounds in Green Process

a+4ob #5910 RT: 23.04 AV: 1 NL: 1.13E9  
T: {0,0} + c EI Full ms [10.00-800.00]

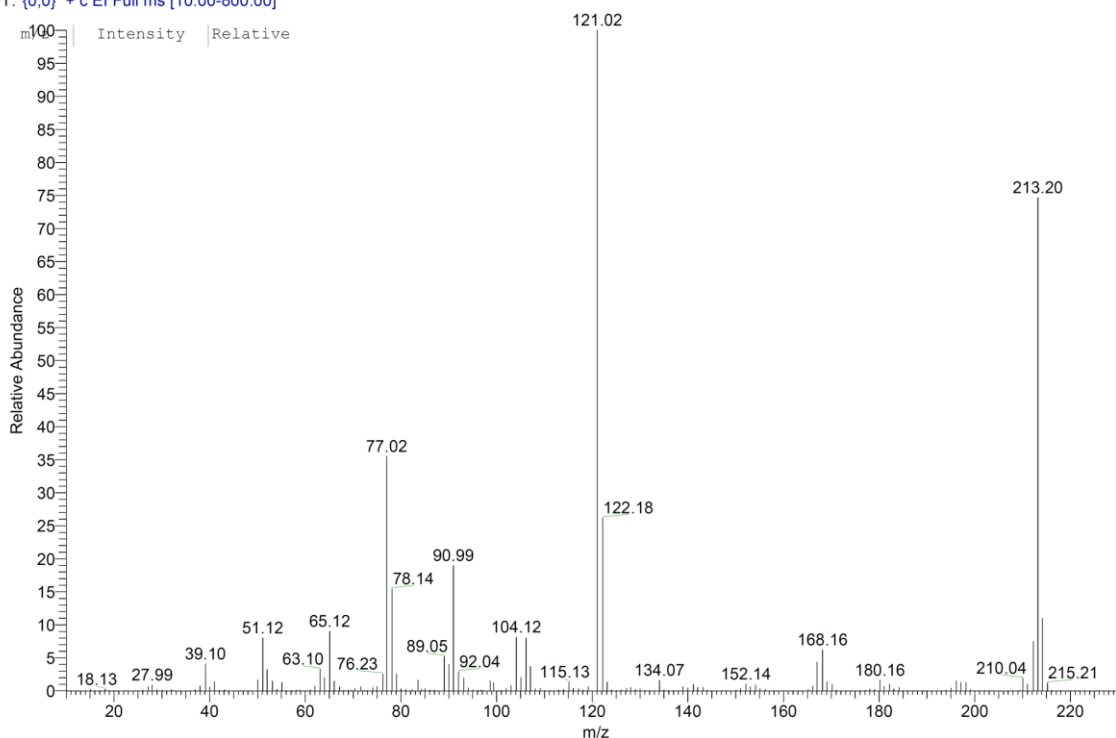

48-PA+B-H#1-20 RT: 0.00-0.27 AV: 20  
T: FTMS + p ESI Full ms [50.00-1000.00]  
m/z= 213.7896-214.5410

| Isotope | Min | Max |
|---------|-----|-----|
| C-12    | 0   | 14  |
| H-1     | 0   | 16  |
| N-14    | 0   | 1   |
| O-16    | 0   | 1   |

Charge 1

Mass tolerance 1000.00 ppm

Nitrogen rule not used

RDB equiv -1.00-100.00

max results 1

| m/z      | Intensity  | Relative | Theo. Mass | Delta (ppm) | Composition                         |
|----------|------------|----------|------------|-------------|-------------------------------------|
| 214.1222 | 53240772.0 | 100.00   | 214.1226   | -1.93       | C <sub>14</sub> H <sub>16</sub> O N |

**Figure S57.** Mass spectrum and HMS data of N-(4-methoxybenzyl)aniline

Iridium/Graphene Nanostructured Catalyst for the N-Alkylation of Amines to Synthesize Nitrogen-containing Derivatives and Heterocyclic Compounds in Green Process

a+4cl #5570 RT: 21.89 AV: 1 NL: 1.14E9  
T: {0,0} + c EI Full ms [10.00-800.00]

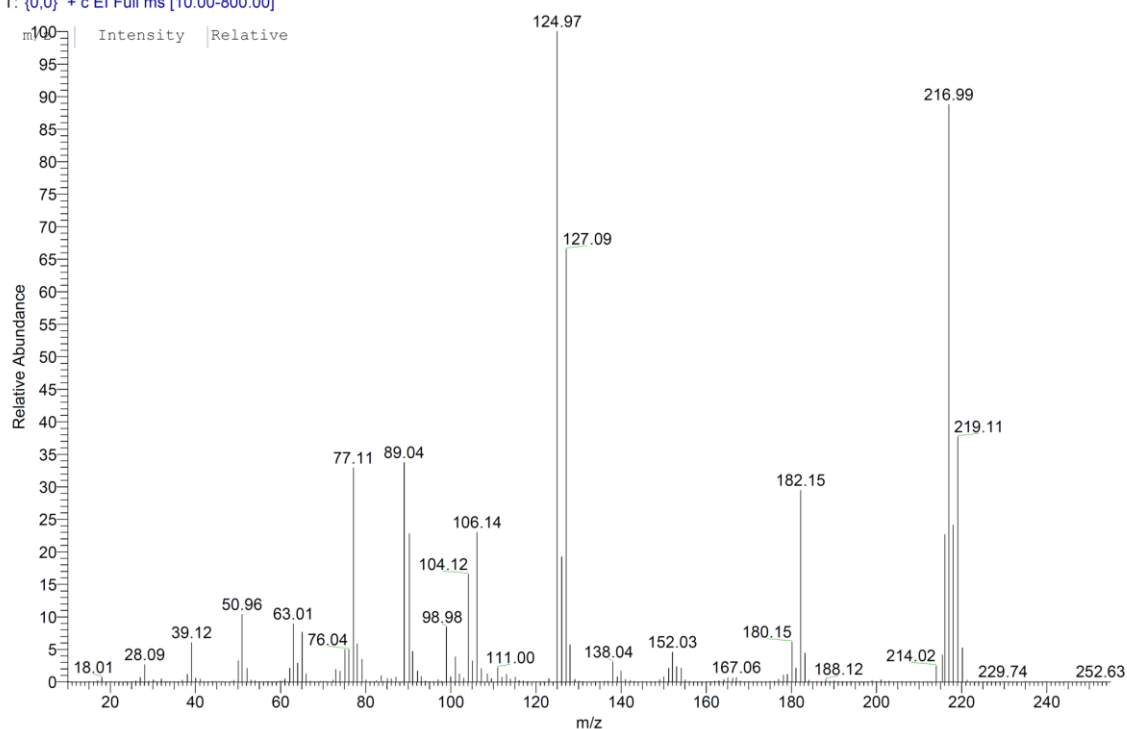

64-A+4ClB-H#1-20 RT: 0.01-0.53 AV: 20  
T: FTMS + p ESI Full ms [50.00-1000.00]  
m/z= 217.6655-218.5323

Isotope Min Max  
C-12 0 13  
H-1 0 13  
N-14 0 1  
Cl-35 0 1

Charge 1

Mass tolerance 1000.00 ppm

Nitrogen rule not used

RDB equiv -1.00-100.00

max results 1

| m/z      | Intensity | Relative | Theo. Mass | Delta (ppm) | Composition                         |
|----------|-----------|----------|------------|-------------|-------------------------------------|
| 218.0731 | 9187648.0 | 100.00   | 218.0731   | -0.03       | C <sub>13</sub> H <sub>13</sub> NCl |

**Figure S58.** Mass spectrum and HMS data of N-(p-chlorobenzyl)aniline

Iridium/Graphene Nanostructured Catalyst for the N-Alkylation of Amines to Synthesize Nitrogen-containing Derivatives and Heterocyclic Compounds in Green Process

pa+b-5 #5715 RT: 22.38 AV: 1 NL: 1.14E9  
T: (0.0) + c EI Full ms [10.00-800.00]

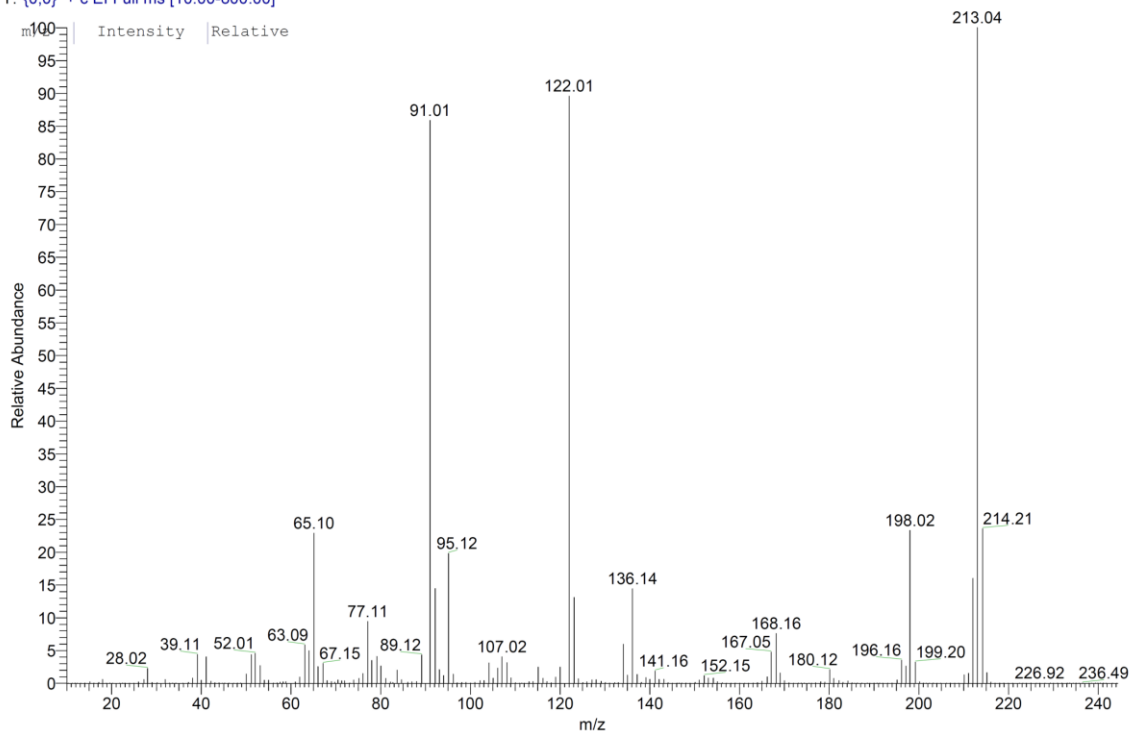

48-PA+B-H#1-20 RT: 0.00-0.27 AV: 20  
T: FTMS + p ESI Full ms [50.00-1000.00]  
m/z= 213.7896-214.5410

| Isotope | Min | Max |
|---------|-----|-----|
| C-12    | 0   | 14  |
| H-1     | 0   | 16  |
| N-14    | 0   | 1   |
| O-16    | 0   | 1   |

Charge 1

Mass tolerance 1000.00 ppm

Nitrogen rule not used

RDB equiv -1.00-100.00

max results 1

| m/z      | Intensity  | Relative | Theo. Mass | Delta (ppm) | Composition                         |
|----------|------------|----------|------------|-------------|-------------------------------------|
| 214.1222 | 53240772.0 | 100.00   | 214.1226   | -1.93       | C <sub>14</sub> H <sub>16</sub> O N |

**Figure S59.** Mass spectrum and HMS data of benzyl(4-methoxyphenyl)amine

Iridium/Graphene Nanostructured Catalyst for the N-Alkylation of Amines to Synthesize Nitrogen-containing Derivatives and Heterocyclic Compounds in Green Process

dc+b-3 #5650 RT: 22.16 AV: 1 NL: 1.08E9  
 T: {0,0} + c EI Full ms [10.00-800.00]

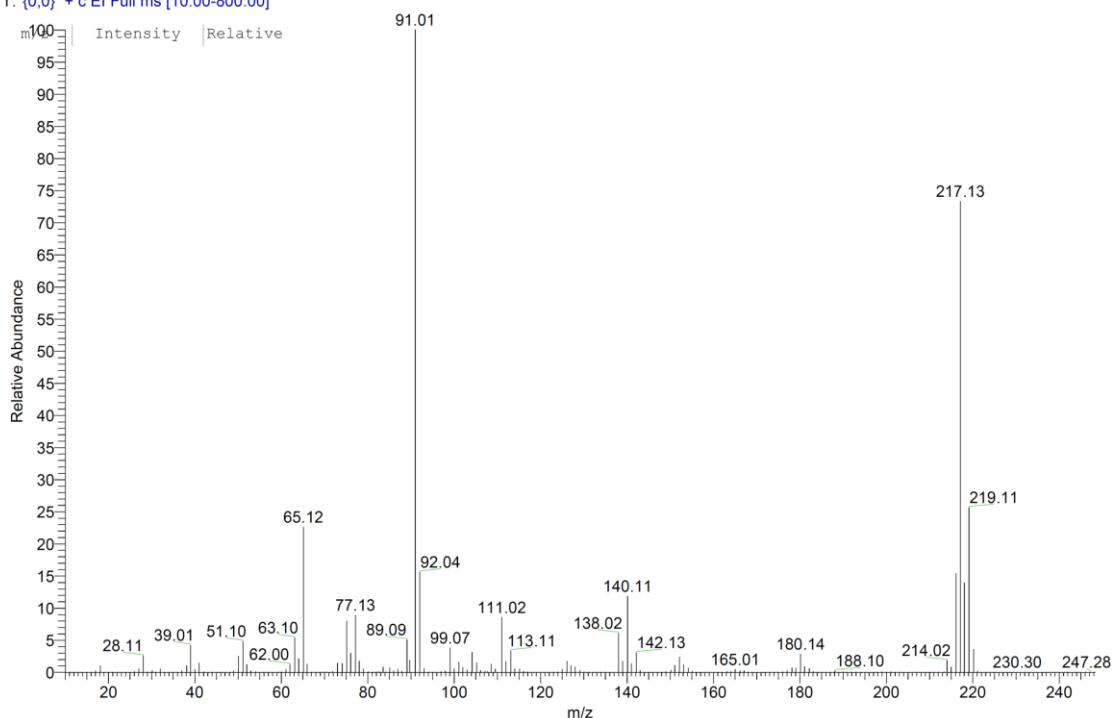

16-PC+B-H#1-20 RT: 0.01-0.52 AV: 20  
 T: FTMS + p ESI Full ms [50.00-1000.00]  
 m/z= 218.0204-218.1504

Isotope Min Max  
 C-12 0 13  
 H-1 0 13  
 N-14 0 1  
 Cl-35 0 1  
 Charge 1  
 Mass tolerance 1000.00 ppm  
 Nitrogen rule not used  
 RDB equiv -1.00-100.00  
 max results 1

| m/z       | Intensity  | Relative | Theo. Mass | Delta (ppm) | Composition                          |
|-----------|------------|----------|------------|-------------|--------------------------------------|
| 218.07311 | 83306456.0 | 100.00   | 218.07310  | 0.03        | C <sub>13</sub> H <sub>13</sub> N Cl |

**Figure S60.** Mass spectrum and HMS data of N-(4-chlorophenyl)benzylamine



Iridium/Graphene Nanostructured Catalyst for the N-Alkylation of Amines to Synthesize Nitrogen-containing Derivatives and Heterocyclic Compounds in Green Process

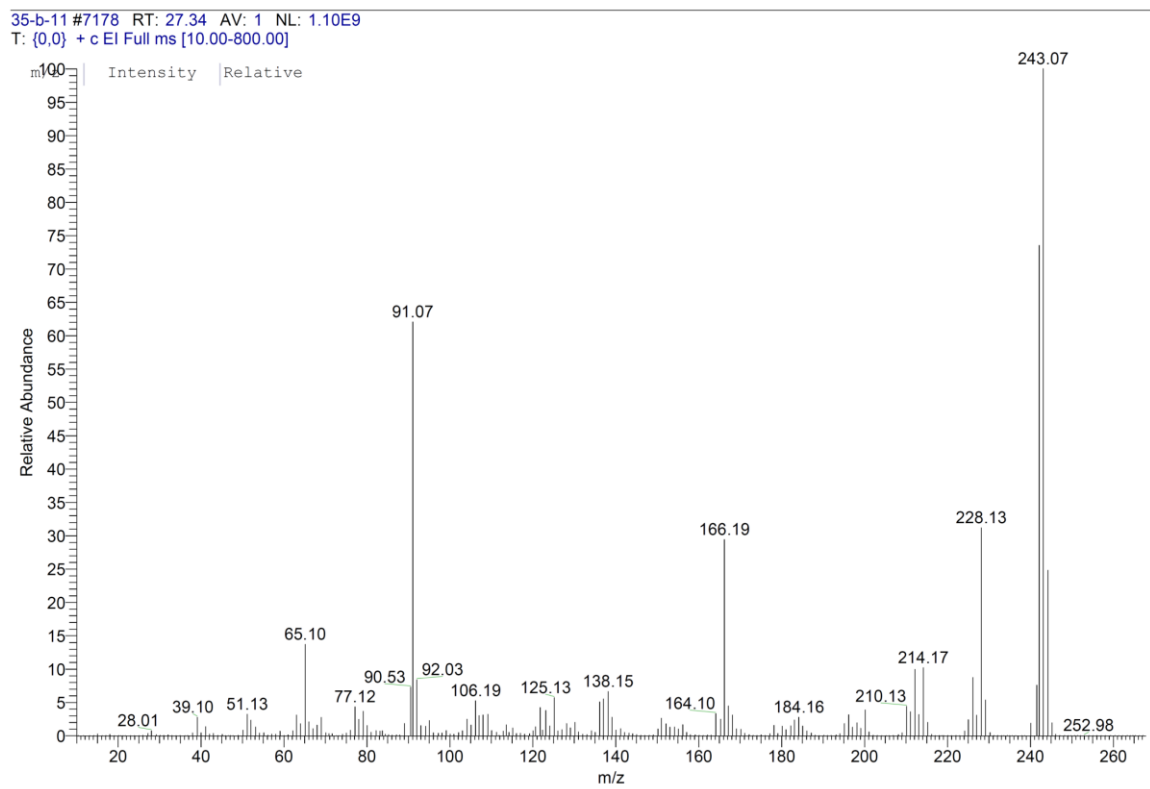

04-3,50A+B-H#1-20 RT: 0.02-0.54 AV: 20  
T: FTMS + p ESI Full ms [50.00-1000.00]

m/z = 244.0767-244.2075

| Isotope | Min | Max |
|---------|-----|-----|
| C-12    | 0   | 15  |
| H-1     | 0   | 18  |
| N-14    | 0   | 1   |
| O-16    | 0   | 2   |

Charge 1

Mass tolerance 1000.00 ppm

Nitrogen rule not used

RDB equiv -1.00-100.00

max results 1

| m/z      | Intensity  | Relative | Theo. Mass | Delta (ppm) | Composition                                      |
|----------|------------|----------|------------|-------------|--------------------------------------------------|
| 244.1333 | 62124160.0 | 100.00   | 244.1332   | 0.33        | C <sub>15</sub> H <sub>18</sub> O <sub>2</sub> N |

**Figure S61.** Mass spectrum and HMS data of N-Benzyl-3,5-dimethoxyaniline

Iridium/Graphene Nanostructured Catalyst for the N-Alkylation of Amines to Synthesize Nitrogen-containing Derivatives and Heterocyclic Compounds in Green Process

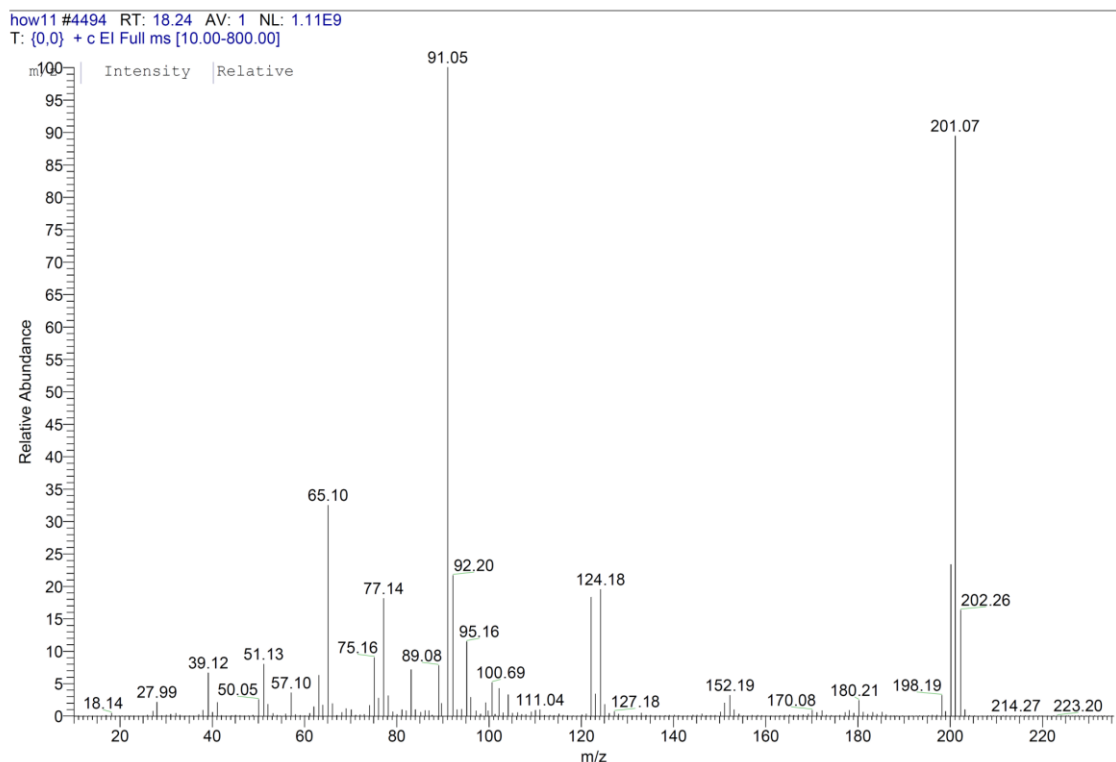

39-2F-B-APCI-H#1-20 RT: 0.02-0.54 AV: 20  
T: FTMS + p APCI corona Full ms [150.00-500.00]  
m/z= 201.8418-202.3504

| Isotope | Min | Max |
|---------|-----|-----|
| N-14    | 0   | 1   |
| C-12    | 0   | 13  |
| H-1     | 0   | 13  |
| F-19    | 0   | 1   |

Charge 1

Mass tolerance 1000.00 ppm

Nitrogen rule not used

RDB equiv -1.00-100.00

max results 1

| m/z      | Intensity   | Relative | Theo. Mass | Delta (ppm) | Composition                         |
|----------|-------------|----------|------------|-------------|-------------------------------------|
| 202.1020 | 113925080.0 | 100.00   | 202.1027   | -3.41       | C <sub>13</sub> H <sub>13</sub> N F |

**Figure S62.** Mass spectrum and HMS data of N-benzyl-(2-fluorophenyl)amine

Iridium/Graphene Nanostructured Catalyst for the N-Alkylation of Amines to Synthesize Nitrogen-containing Derivatives and Heterocyclic Compounds in Green Process

a+ethanol #2276 RT: 10.72 AV: 1 NL: 1.03E9  
T: {0,0} + c EI Full ms [10.00-800.00]

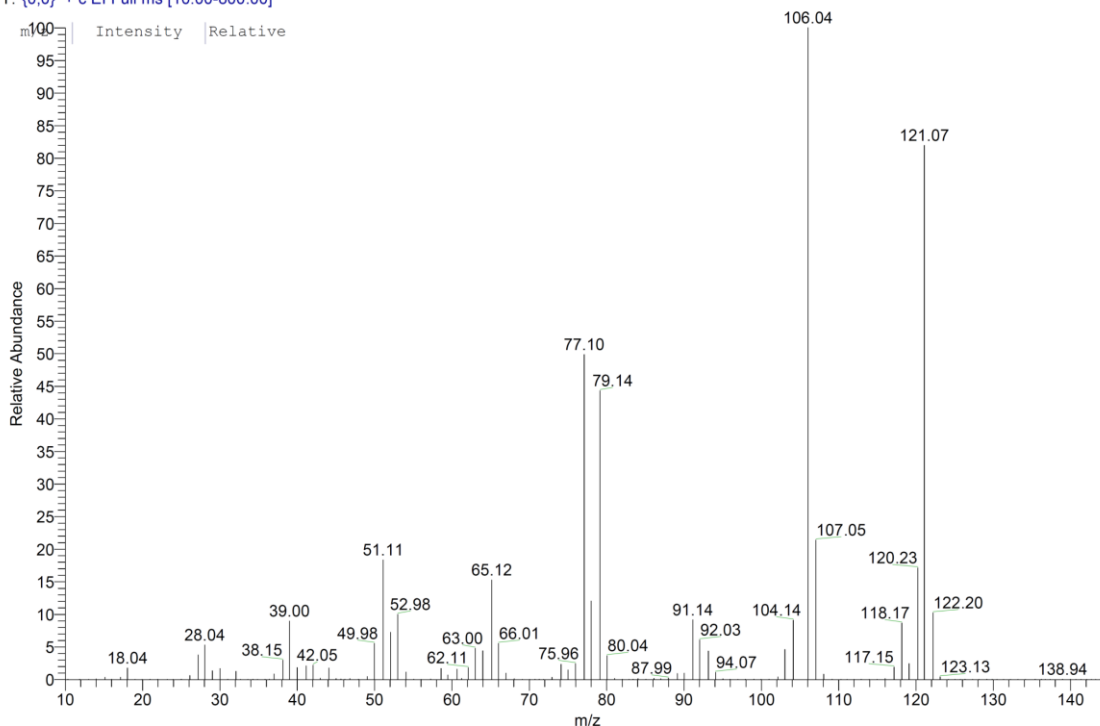

55-A+Ethanol-H#1-20 RT: 0.00-0.52 AV: 20

T: FTMS + p ESI Full ms [50.00-1000.00]

m/z= 122.0573-122.1269

Isotope Min Max

C-12 0 8

H-1 0 20

N-14 0 1

Charge 1

Mass tolerance 1000.00 ppm

Nitrogen rule not used

RDB equiv -1.00-100.00

max results 1

| m/z      | Intensity | Relative | Theo. Mass | Delta (ppm) | Composition                      |
|----------|-----------|----------|------------|-------------|----------------------------------|
| 122.0965 | 3147732.0 | 100.00   | 122.0964   | 0.54        | C <sub>8</sub> H <sub>12</sub> N |

**Figure S63.** Mass spectrum and HMS data of N-ethyl-N-phenylamine

Iridium/Graphene Nanostructured Catalyst for the N-Alkylation of Amines to Synthesize Nitrogen-containing Derivatives and Heterocyclic Compounds in Green Process

a+propanol-5 #2765 RT: 12.38 AV: 1 NL: 1.13E9  
T: {0,0} +c EI Full ms [10.00-800.00]

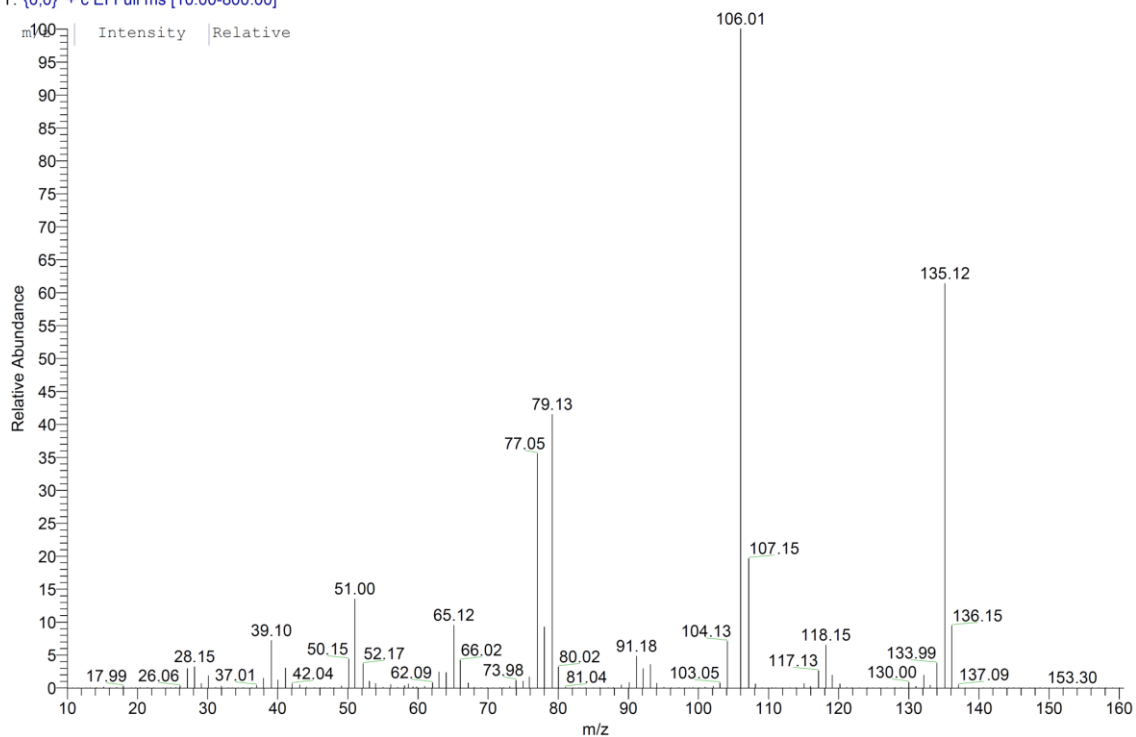

10-A+n-propanol-H#1-20 RT: 0.02-0.53 AV: 20

T: FTMS + p ESI Full ms [50.00-1000.00]

m/z= 135.9883-136.2809

Isotope Min Max

C-12 0 9

H-1 0 14

N-14 0 1

Charge 1

Mass tolerance 1000.00 ppm

Nitrogen rule not used

RDB equiv -1.00-100.00

max results 1

| m/z      | Intensity  | Relative | Theo. Mass | Delta (ppm) | Composition                      |
|----------|------------|----------|------------|-------------|----------------------------------|
| 136.1120 | 30461088.0 | 100.00   | 136.1121   | -0.55       | C <sub>9</sub> H <sub>14</sub> N |

Figure S64. Mass spectrum and HMS data of N-propylaniline

Iridium/Graphene Nanostructured Catalyst for the N-Alkylation of Amines to Synthesize Nitrogen-containing Derivatives and Heterocyclic Compounds in Green Process

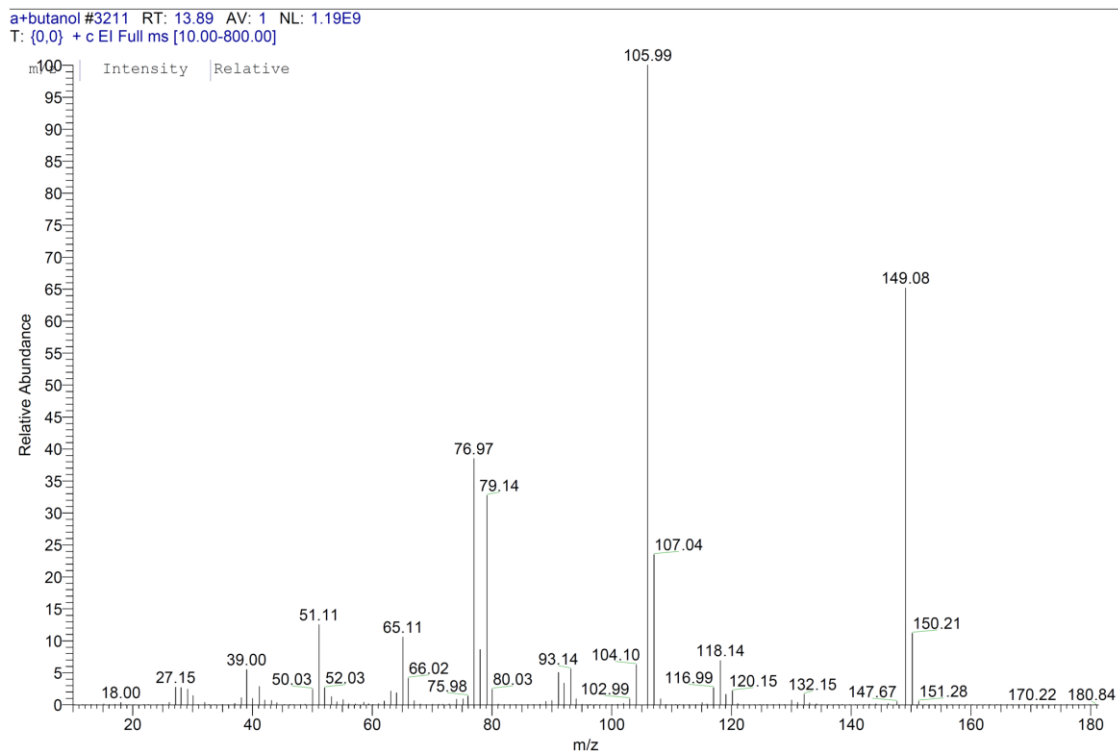

45-A+n-Butanol-H#1-20 RT: 0.00-0.28 AV: 20

T: FTMS + p ESI Full ms [50.00-1000.00]

m/z= 149.9308-150.3671

Isotope Min Max

C-12 0 10

H-1 0 16

N-14 0 1

Charge 1

Mass tolerance 1000.00 ppm

Nitrogen rule not used

RDB equiv -1.00-100.00

max results 1

| m/z      | Intensity  | Relative | Theo. Mass | Delta (ppm) | Composition                       |
|----------|------------|----------|------------|-------------|-----------------------------------|
| 150.1274 | 38473784.0 | 100.00   | 150.1277   | -1.97       | C <sub>10</sub> H <sub>16</sub> N |

**Figure S65.** Mass spectrum and HMS data of N-(n-butyl)aniline

Iridium/Graphene Nanostructured Catalyst for the N-Alkylation of Amines to Synthesize Nitrogen-containing Derivatives and Heterocyclic Compounds in Green Process

a+hexanol-5 #4022 RT: 16.64 AV: 1 NL: 1.20E9  
T: {0,0} + c EI Full ms [10.00-800.00]

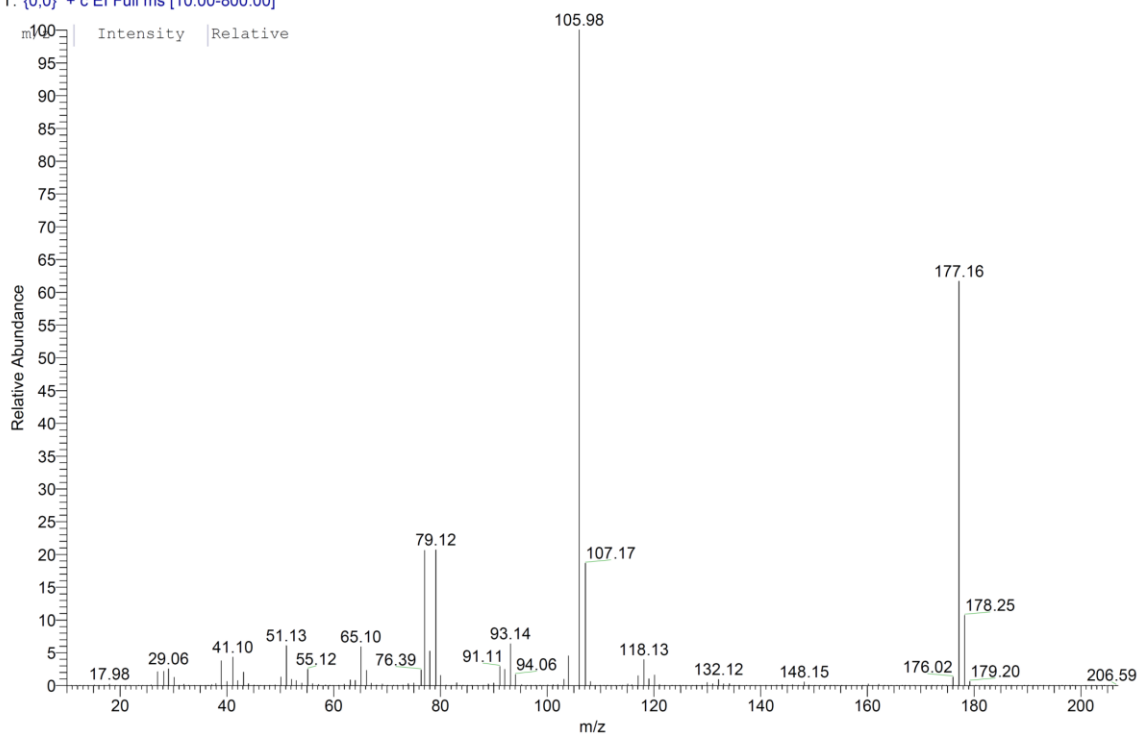

01-12, K-H#1-20 RT: 0.02-0.40 AV:20  
T: FTMS + p ESI Full ms [50.00-1000.00]  
m/z = 178.2353-178.3661

| Isotope | Min | Max |
|---------|-----|-----|
| C-12    | 0   | 12  |
| H-1     | 0   | 20  |
| N-14    | 0   | 1   |

Charge 1  
Mass tolerance 1000.00 ppm  
Nitrogen rule not used  
RDB equiv -1.00-100.00  
Max results 1

| m/z      | Intensity  | Relative | Theo. Mass | Delta (ppm) | Composition                       |
|----------|------------|----------|------------|-------------|-----------------------------------|
| 178.2920 | 45346102.0 | 100.00   | 178.2919   | 0.56        | C <sub>12</sub> H <sub>20</sub> N |

**Figure S66.** Mass spectrum and HMS data of N-hexylaniline

Iridium/Graphene Nanostructured Catalyst for the N-Alkylation of Amines to Synthesize Nitrogen-containing Derivatives and Heterocyclic Compounds in Green Process

E2-005g #5585 RT: 21.94 AV: 1 NL: 7.64E8  
T: {0,0} + c EI Full ms [10.00-800.00]

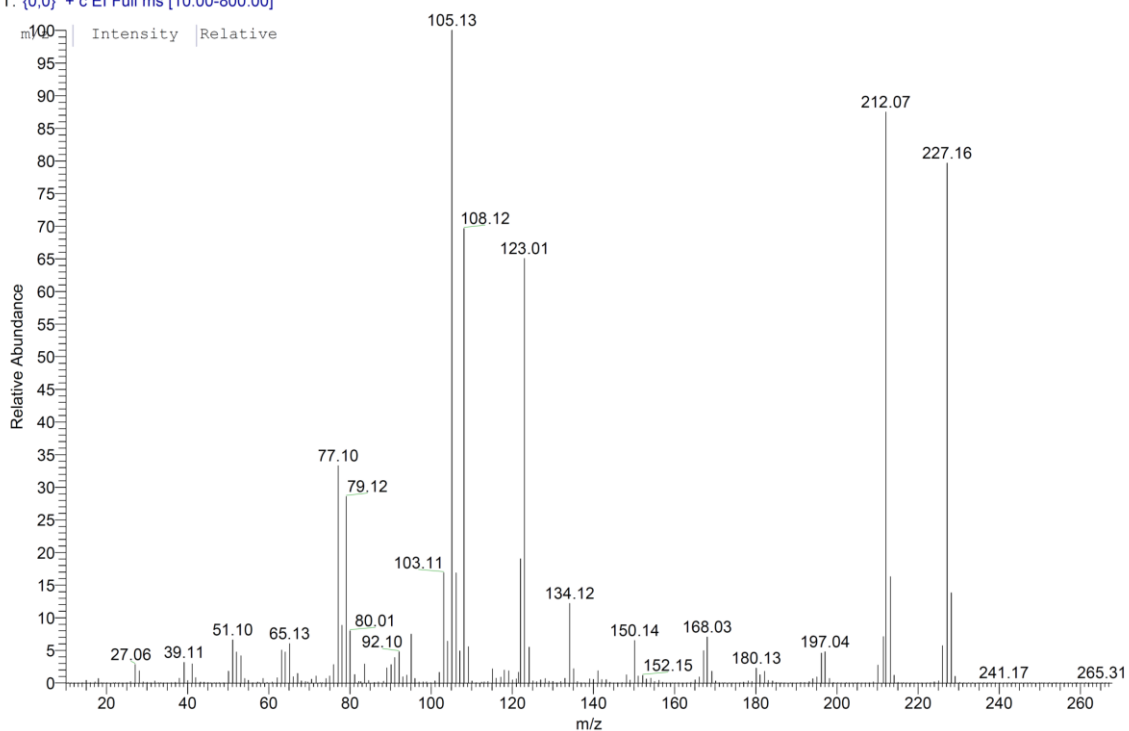

04-13, L-H#1-20 RT: 0.01-0.38 AV:20  
T: FTMS + p ESI Full ms [50.00-1000.00]  
m/z = 228.2507-228.3815

| Isotope | Min | Max |
|---------|-----|-----|
| C-12    | 0   | 15  |
| H-1     | 0   | 18  |
| N-14    | 0   | 1   |
| O-16    | 0   | 1   |

Charge 1

Mass tolerance 1000.00 ppm

Nitrogen rule not used

RDB equiv -1.00-100.00

Max results 1

| m/z      | Intensity  | Relative | Theo. Mass | Delta (ppm) | Composition                        |
|----------|------------|----------|------------|-------------|------------------------------------|
| 228.3075 | 48916661.0 | 100.00   | 228.3073   | 0.78        | C <sub>15</sub> H <sub>18</sub> ON |

**Figure S67.** Mass spectrum and HMS data of 4-Methoxy-N-(1-phenylethyl)aniline

Iridium/Graphene Nanostructured Catalyst for the N-Alkylation of Amines to Synthesize Nitrogen-containing Derivatives and Heterocyclic Compounds in Green Process

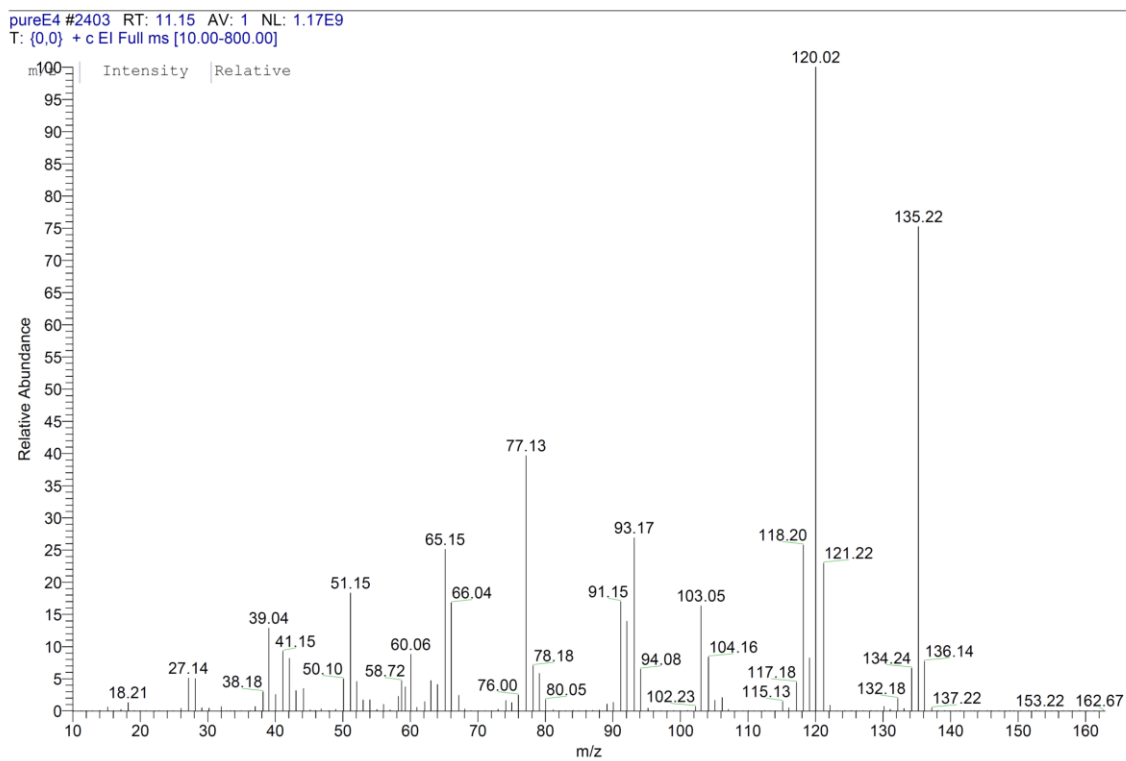

T: FTMS + p ESI Full ms [50.00-1000.00]

m/z= 135.9883-136.2809

Isotope Min Max

C-12 0 9

H-1 0 14

N-14 0 1

Charge 1

Mass tolerance 1000.00 ppm

Nitrogen rule not used

RDB equiv -1.00-100.00

max results 1

| m/z      | Intensity  | Relative | Theo. Mass | Delta (ppm) | Composition                      |
|----------|------------|----------|------------|-------------|----------------------------------|
| 136.1120 | 30461088.0 | 100.00   | 136.1121   | -0.55       | C <sub>9</sub> H <sub>14</sub> N |

Figure S68. Mass spectrum and HMS data of N-Isopropylaniline



Iridium/Graphene Nanostructured Catalyst for the N-Alkylation of Amines to Synthesize Nitrogen-containing Derivatives and Heterocyclic Compounds in Green Process

ISO-PA #3428 RT: 14.62 AV: 1 NL: 1.01E9  
T: {0,0} + c EI Full ms [10.00-800.00]

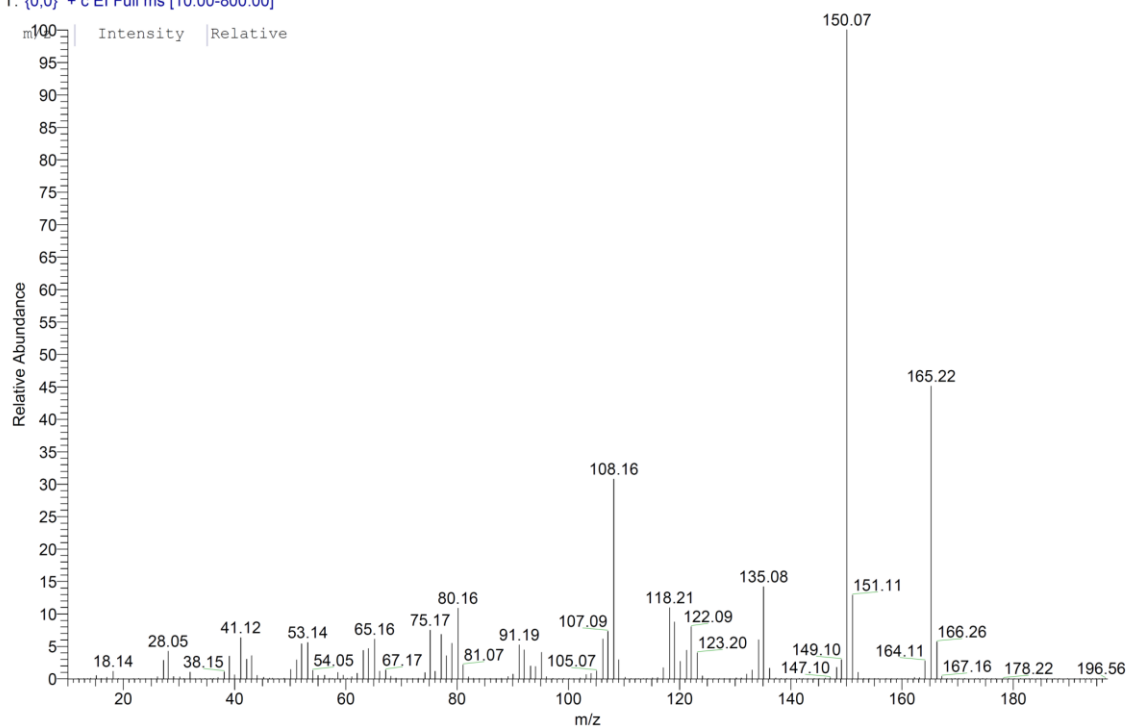

56-PA-ISO-APCI-H#1-20 RT: 0.02-0.58 AV: 20  
T: FTMS + p APCI corona Full ms [100.00-500.00]  
m/z= 166.0162-166.2431

Isotope Min Max  
N-14 0 1  
C-12 0 10  
H-1 0 16  
O-16 0 1

Charge 1

Mass tolerance 1000.00 ppm

Nitrogen rule not used

RDB equiv -1.00-100.00

max results 1

| m/z      | Intensity | Relative | Theo. Mass | Delta (ppm) | Composition                        |
|----------|-----------|----------|------------|-------------|------------------------------------|
| 166.1223 | 9010727.0 | 100.00   | 166.1226   | -2.12       | C <sub>10</sub> H <sub>16</sub> ON |

Figure S69. Mass spectrum and HMS data of N-Isopropyl-p-anisidine

Iridium/Graphene Nanostructured Catalyst for the N-Alkylation of Amines to Synthesize Nitrogen-containing Derivatives and Heterocyclic Compounds in Green Process

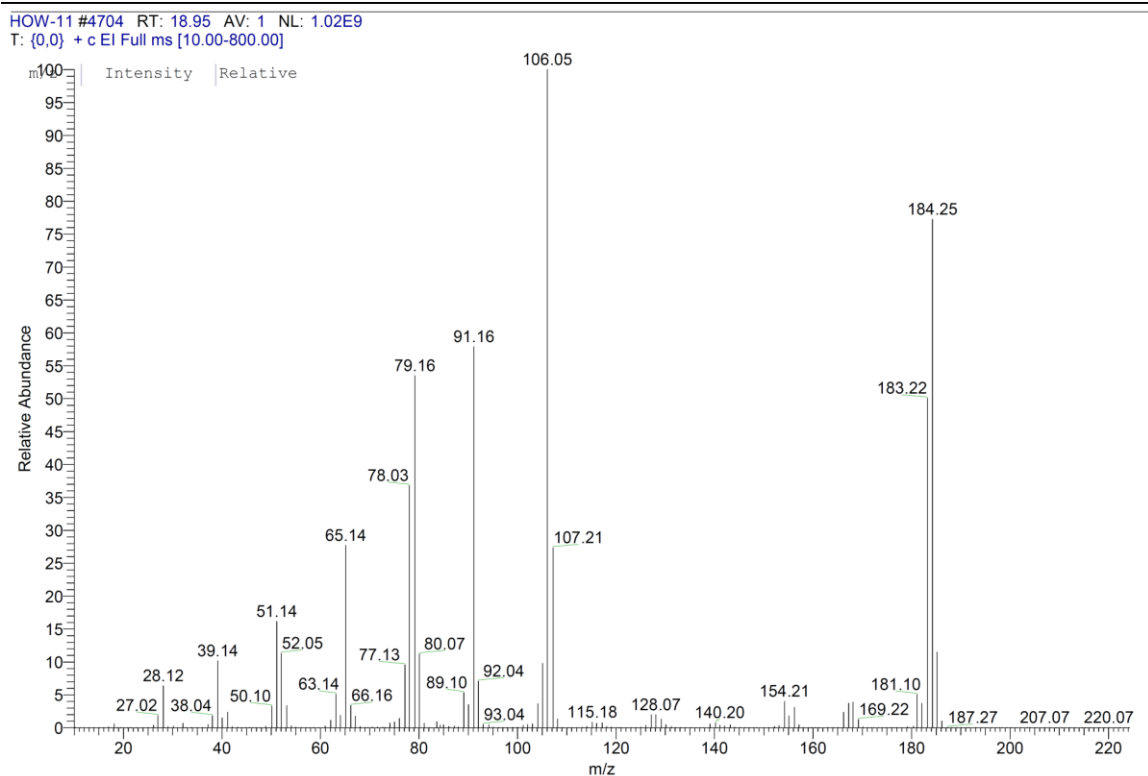

65-2-dine-B-APCI-H#1-20 RT: 0.01-0.53 AV: 20  
T: FTMS + p APCI corona Full ms [100.00-500.00]  
m/z = 184.7356-185.6442

Isotope Min Max  
N-14 0 2  
C-12 0 12  
H-1 0 13

Charge 1  
Mass tolerance 1000.00 ppm  
Nitrogen rule not used  
RDB equiv -1.00-100.00  
max results 1

| m/z      | Intensity   | Relative | Theo. Mass | Delta (ppm) | Composition                                    |
|----------|-------------|----------|------------|-------------|------------------------------------------------|
| 185.1067 | 122861736.0 | 100.00   | 185.1073   | -3.45       | C <sub>12</sub> H <sub>13</sub> N <sub>2</sub> |

Figure S70. Mass spectrum and HMS data of N-benzylpyridin-2-amine

Iridium/Graphene Nanostructured Catalyst for the N-Alkylation of Amines to Synthesize Nitrogen-containing Derivatives and Heterocyclic Compounds in Green Process

2-ol+B-- #5478 RT: 21.58 AV: 1 NL: 8.63E8  
T: {0,0} + c EI Full ms [10.00-800.00]

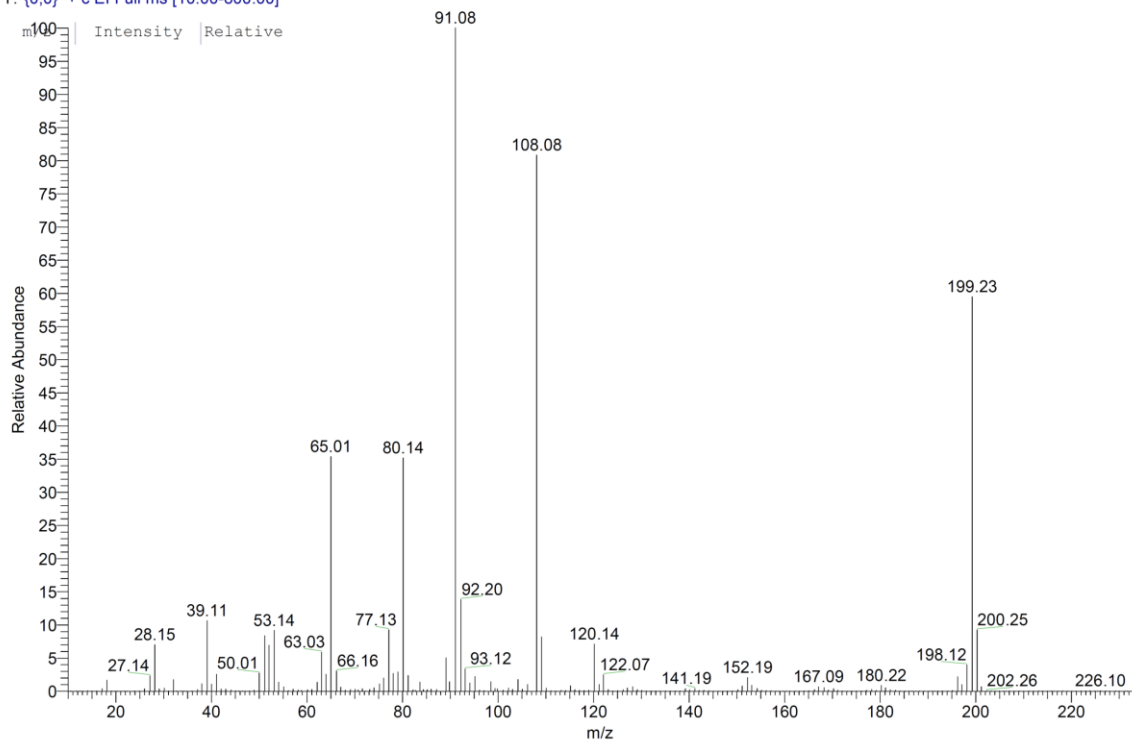

04-15, P-H#1-20 RT: 0.00-0.25 AV:20  
T: FTMS + p ESI Full ms [50.00-1000.00]  
m/z = 200.1979-200.3288

| Isotope | Min | Max |
|---------|-----|-----|
| C-12    | 0   | 13  |
| H-1     | 0   | 14  |
| N-14    | 0   | 1   |
| O-16    | 0   | 1   |

Charge 1

Mass tolerance 1000.00 ppm

Nitrogen rule not used

RDB equiv -1.00-100.00

Max results 1

| m/z      | Intensity  | Relative | Theo. Mass | Delta (ppm) | Composition                        |
|----------|------------|----------|------------|-------------|------------------------------------|
| 200.2542 | 56476509.0 | 100.00   | 200.2546   | -1.79       | C <sub>13</sub> H <sub>14</sub> ON |

**Figure S71.** Mass spectrum and HMS data of o-(benzylamino)phenol

Iridium/Graphene Nanostructured Catalyst for the N-Alkylation of Amines to Synthesize Nitrogen-containing Derivatives and Heterocyclic Compounds in Green Process

E-26 #4608 RT: 18.63 AV: 1 NL: 9.80E8  
T: {0,0} + c EI Full ms [10.00-800.00]

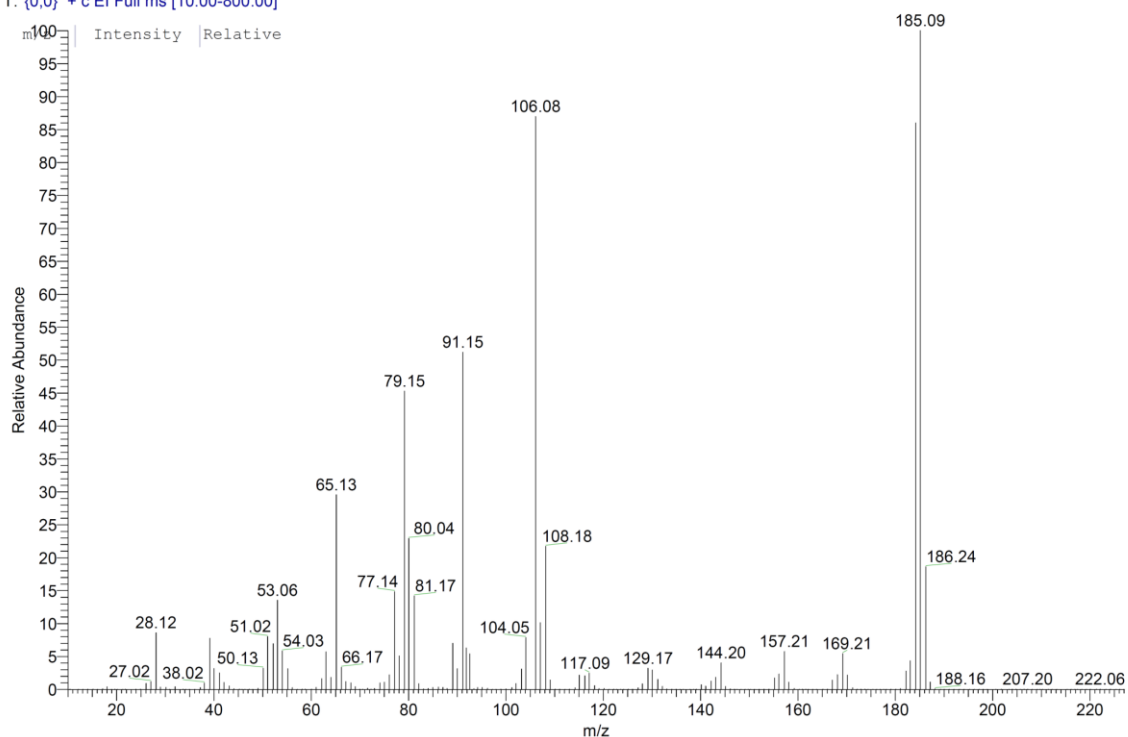

44-midine-B-APCI-H#1-20 RT: 0.01-0.54 AV: 20  
T: FTMS + p APCI corona Full ms [150.00-500.00]  
m/z= 185.8620-186.3691

Isotope Min Max  
N-14 0 3  
C-12 0 11  
H-1 0 12

Charge 1

Mass tolerance 1000.00 ppm

Nitrogen rule not used

RDB equiv -1.00-100.00

max results 1

| m/z      | Intensity   | Relative | Theo. Mass | Delta (ppm) | Composition                                    |
|----------|-------------|----------|------------|-------------|------------------------------------------------|
| 186.1019 | 108207144.0 | 100.00   | 186.1026   | -3.47       | C <sub>11</sub> H <sub>12</sub> N <sub>3</sub> |

**Figure S72.** Mass spectrum and HMS data of 2-(benzylamino)pyrimidine

Iridium/Graphene Nanostructured Catalyst for the N-Alkylation of Amines to Synthesize Nitrogen-containing Derivatives and Heterocyclic Compounds in Green Process

24 #8661 RT: 32.37 AV: 1 NL: 3.70E8  
T: {0,0} + c EI Full ms [10.00-800.00]

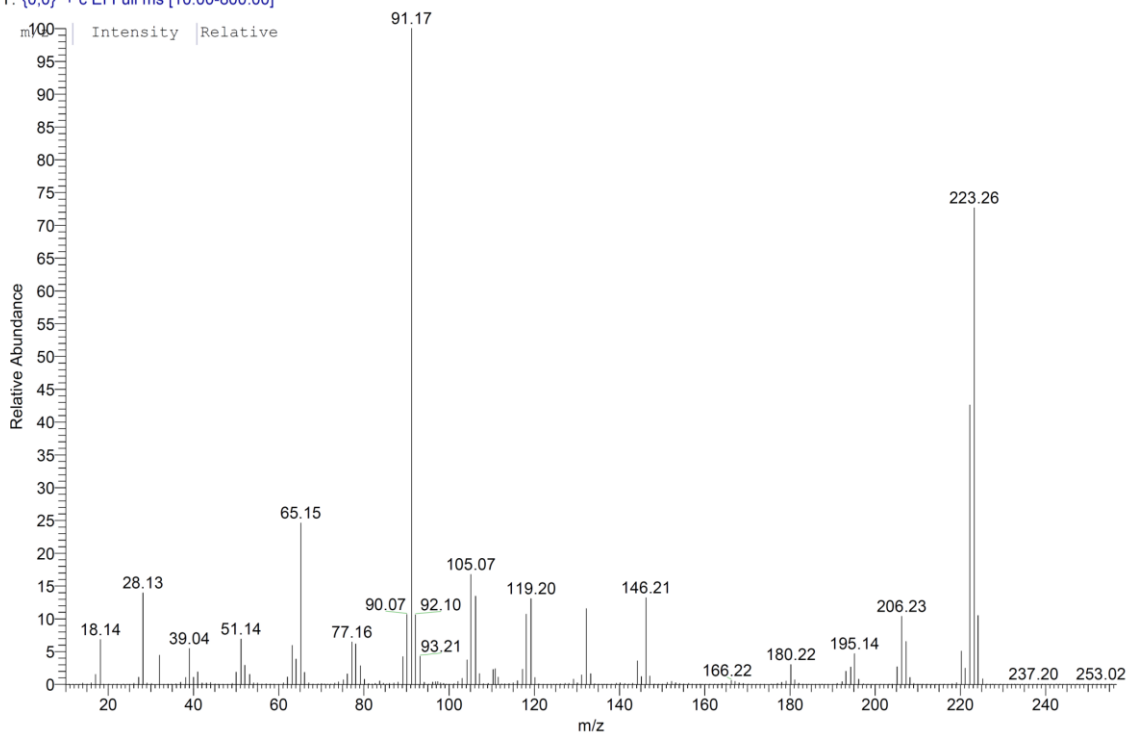

71-2-zole-B-APCI-H#1-20 RT: 0.02-0.54 AV: 20  
T: FTMS + p APCI corona Full ms [100.00-500.00]  
m/z= 223.8487-224.4695

Isotope Min Max  
N-14 0 3  
C-12 0 14  
H-1 0 14

Charge 1  
Mass tolerance 1000.00 ppm  
Nitrogen rule not used  
RDB equiv -1.00-100.00  
max results 1

| m/z      | Intensity   | Relative | Theo. Mass | Delta (ppm) | Composition                                    |
|----------|-------------|----------|------------|-------------|------------------------------------------------|
| 224.1176 | 113778352.0 | 100.00   | 224.1182   | -2.97       | C <sub>14</sub> H <sub>14</sub> N <sub>3</sub> |

**Figure S73.** Mass spectrum and HMS data of (1H-benzoimidazol-2-yl)phenylamine

Iridium/Graphene Nanostructured Catalyst for the N-Alkylation of Amines to Synthesize Nitrogen-containing Derivatives and Heterocyclic Compounds in Green Process

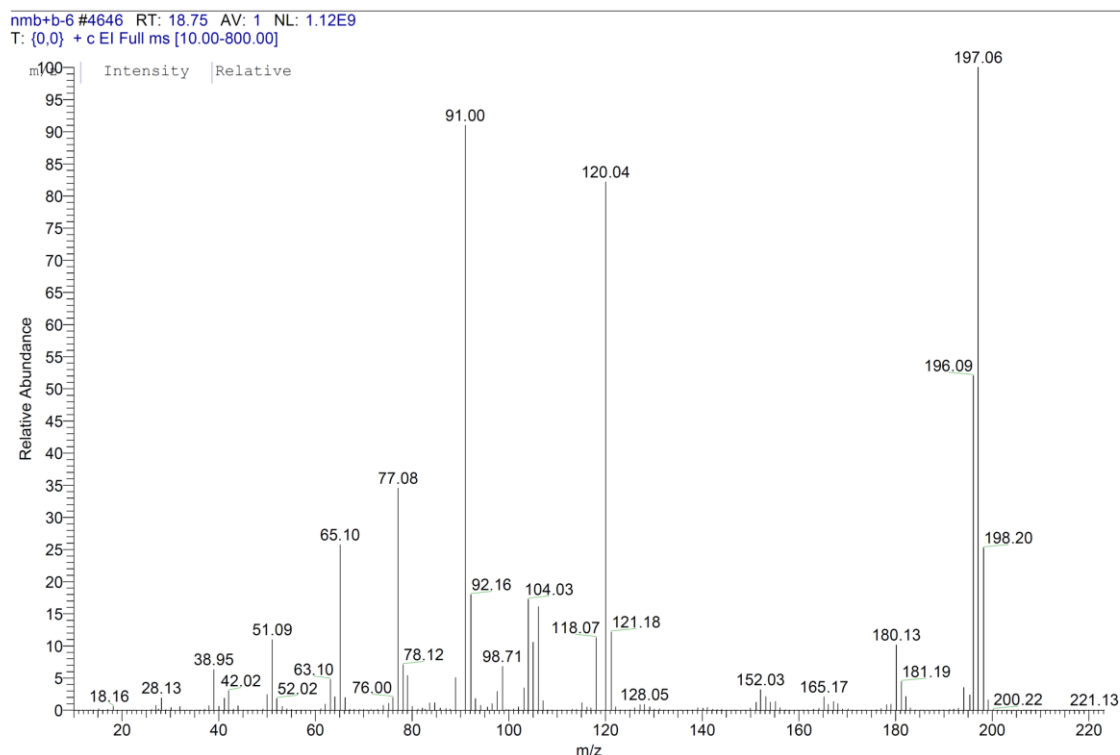

04-2, A-H#1-20 RT: 0.03-0.36 AV:20  
T: FTMS + p ESI Full ms [50.00-1000.00]  
m/z = 198.2253-198.3561

| Isotope | Min | Max |
|---------|-----|-----|
| C-12    | 0   | 14  |
| H-1     | 0   | 16  |
| N-14    | 0   | 1   |

Charge 1

Mass tolerance 1000.00 ppm

Nitrogen rule not used

RDB equiv -1.00-100.00

Max results 1

| m/z      | Intensity  | Relative | Theo. Mass | Delta (ppm) | Composition                       |
|----------|------------|----------|------------|-------------|-----------------------------------|
| 198.2821 | 46709894.0 | 100.00   | 198.2819   | 0.81        | C <sub>14</sub> H <sub>16</sub> N |

**Figure S74.** Mass spectrum and HMS data of N-methyl-N-phenyl-benzenemethanamine

Iridium/Graphene Nanostructured Catalyst for the N-Alkylation of Amines to Synthesize Nitrogen-containing Derivatives and Heterocyclic Compounds in Green Process

nbb+4cl-8 #8504 RT: 31.84 AV: 1 NL: 8.21E8  
T: {0,0} + c EI Full ms [10.00-800.00]

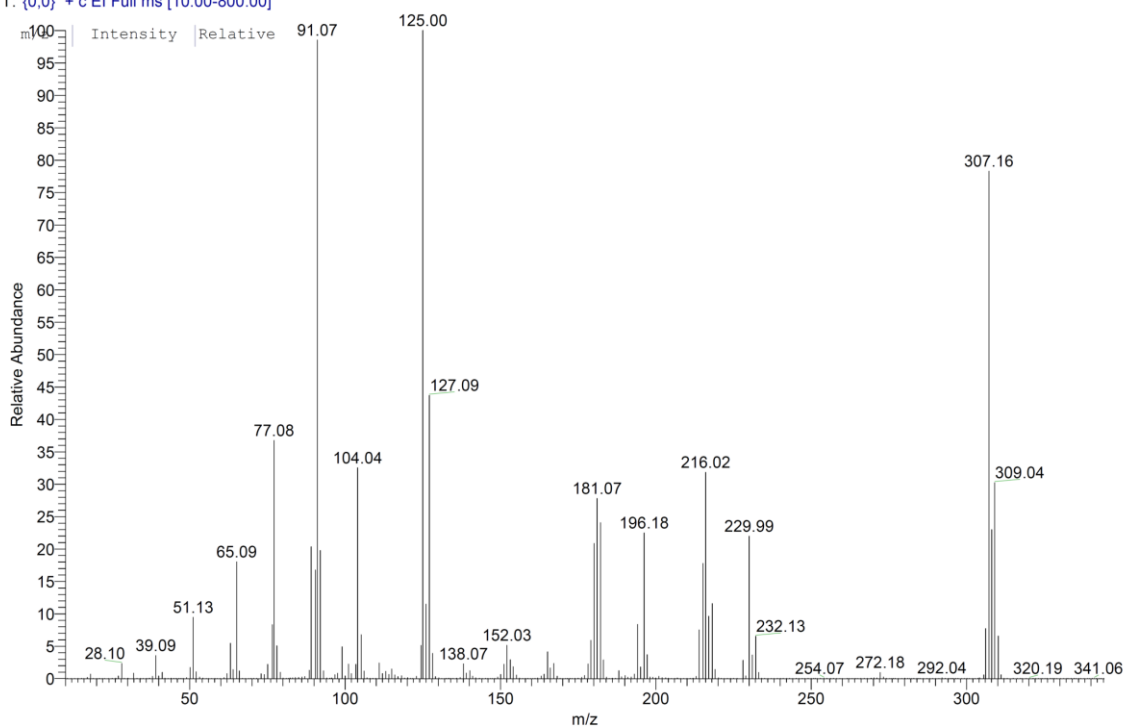

04-2, B-H#1-20 RT: 0.01-0.35 AV:20  
T: FTMS + p ESI Full ms [50.00-1000.00]  
m/z = 308.7660-308.8969

| Isotope | Min | Max |
|---------|-----|-----|
| C-12    | 0   | 20  |
| H-1     | 0   | 19  |
| N-14    | 0   | 1   |
| Cl-35   | 0   | 1   |

Charge 1

Mass tolerance 1000.00 ppm

Nitrogen rule not used

RDB equiv -1.00-100.00

Max results 1

| m/z      | Intensity  | Relative | Theo. Mass | Delta (ppm) | Composition                         |
|----------|------------|----------|------------|-------------|-------------------------------------|
| 308.8225 | 40080103.0 | 100.00   | 308.8226   | -0.51       | C <sub>15</sub> H <sub>16</sub> NC1 |

**Figure S75.** Mass spectrum and HMS data of N-benzyl-N-(4-chloro-benzyl)-aniline

Iridium/Graphene Nanostructured Catalyst for the N-Alkylation of Amines to Synthesize Nitrogen-containing Derivatives and Heterocyclic Compounds in Green Process

nbb+b #7440 RT: 28.23 AV: 1 NL: 1.01E9  
T: {0,0} + c EI Full ms [10.00-800.00]

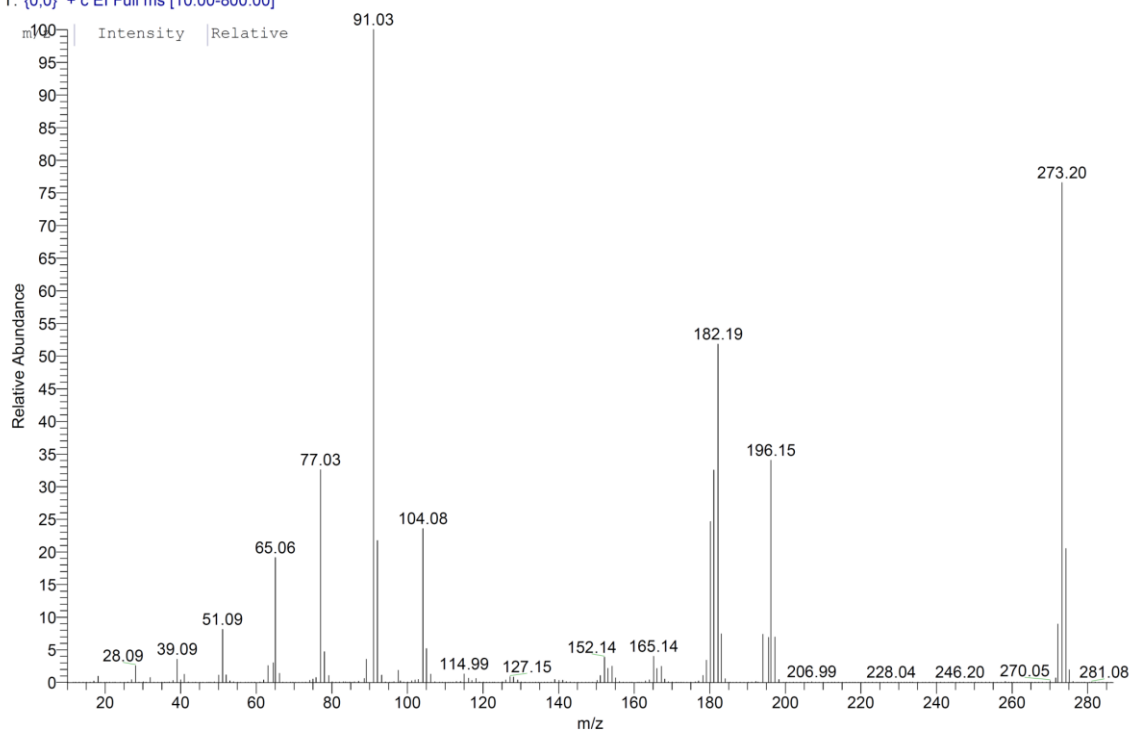

47-N-BB+B-H#1-20 RT: 0.02-0.54 AV: 20  
T: FTMS + p ESI Full ms [50.00-1000.00]  
m/z= 274.0350-274.2826

| Isotope | Min | Max |
|---------|-----|-----|
| C-12    | 0   | 20  |
| H-1     | 0   | 20  |
| N-14    | 0   | 1   |

Charge 1

Mass tolerance 1000.00 ppm

Nitrogen rule not used

RDB equiv -1.00-100.00

max results 1

| m/z      | Intensity  | Relative | Theo. Mass | Delta (ppm) | Composition                       |
|----------|------------|----------|------------|-------------|-----------------------------------|
| 274.1588 | 17067946.0 | 100.00   | 274.1590   | -0.89       | C <sub>20</sub> H <sub>20</sub> N |

**Figure S76.** Mass spectrum and HMS data of N,N-dibenzylaniline



Iridium/Graphene Nanostructured Catalyst for the N-Alkylation of Amines to Synthesize Nitrogen-containing Derivatives and Heterocyclic Compounds in Green Process

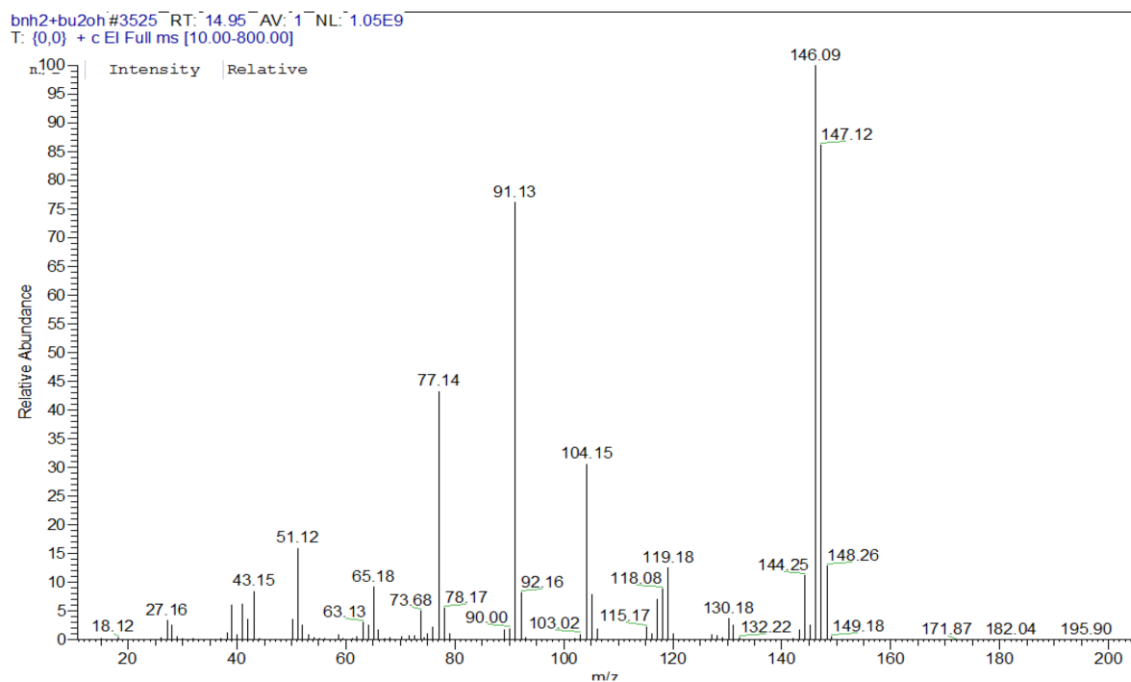

04-3, A-H#1-20 RT: 0.01-0.38 AV:20  
T: FTMS + p ESI Full ms [50.00-1000.00]  
m/z = 148.1669-148.2977

| Isotope | Min | Max |
|---------|-----|-----|
| C-12    | 0   | 13  |
| H-1     | 0   | 14  |
| N-14    | 0   | 1   |

Charge 1

Mass tolerance 1000.00 ppm

Nitrogen rule not used

RDB equiv -1.00-100.00

Max results 1

| m/z      | Intensity  | Relative | Theo. Mass | Delta (ppm) | Composition                       |
|----------|------------|----------|------------|-------------|-----------------------------------|
| 148.2231 | 51770133.0 | 100.00   | 148.2234   | -2.42       | C <sub>13</sub> H <sub>14</sub> N |

**Figure S77.** Mass spectrum and HMS data of N-phenylpyrrolidine

Iridium/Graphene Nanostructured Catalyst for the N-Alkylation of Amines to Synthesize Nitrogen-containing Derivatives and Heterocyclic Compounds in Green Process

bu2nh2+4clbnh2 #4383 RT: 17.86 AV: 1 NL: 5.02E8  
T: {0,0} + c EI Full ms [10.00-800.00]

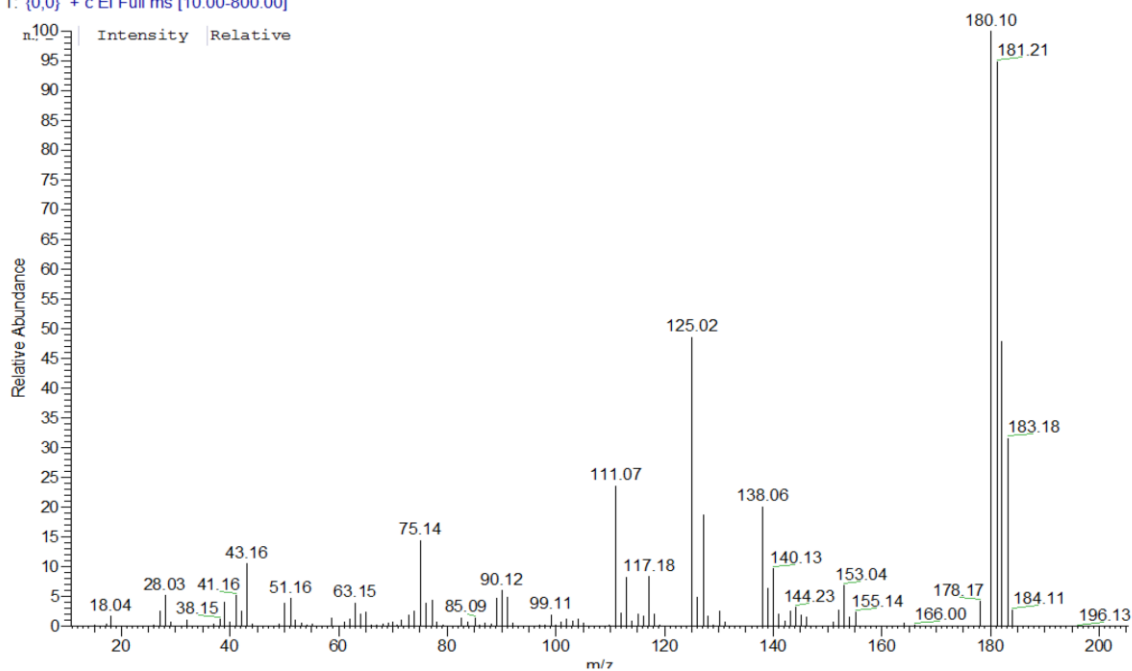

04-3, B-H#1-20 RT: 0.00-0.52 AV: 20  
T: FTMS + p ESI Full ms [50.00-1000.00]  
m/z = 182.6120-182.7428

| Isotope | Min | Max |
|---------|-----|-----|
| C-12    | 0   | 11  |
| H-1     | 0   | 13  |
| N-14    | 0   | 1   |
| Cl-35   | 0   | 1   |

Charge 1

Mass tolerance 1000.00 ppm

Nitrogen rule not used

RDB equiv -1.00-100.00

Max results 1

| m/z      | Intensity  | Relative | Theo. Mass | Delta (ppm) | Composition                         |
|----------|------------|----------|------------|-------------|-------------------------------------|
| 182.6683 | 47787815.0 | 100.00   | 182.6686   | -1.75       | C <sub>11</sub> H <sub>13</sub> NCl |

**Figure S78.** Mass spectrum and HMS data of N-(4-chlorophenyl) pyrrolidine

Iridium/Graphene Nanostructured Catalyst for the N-Alkylation of Amines to Synthesize Nitrogen-containing Derivatives and Heterocyclic Compounds in Green Process

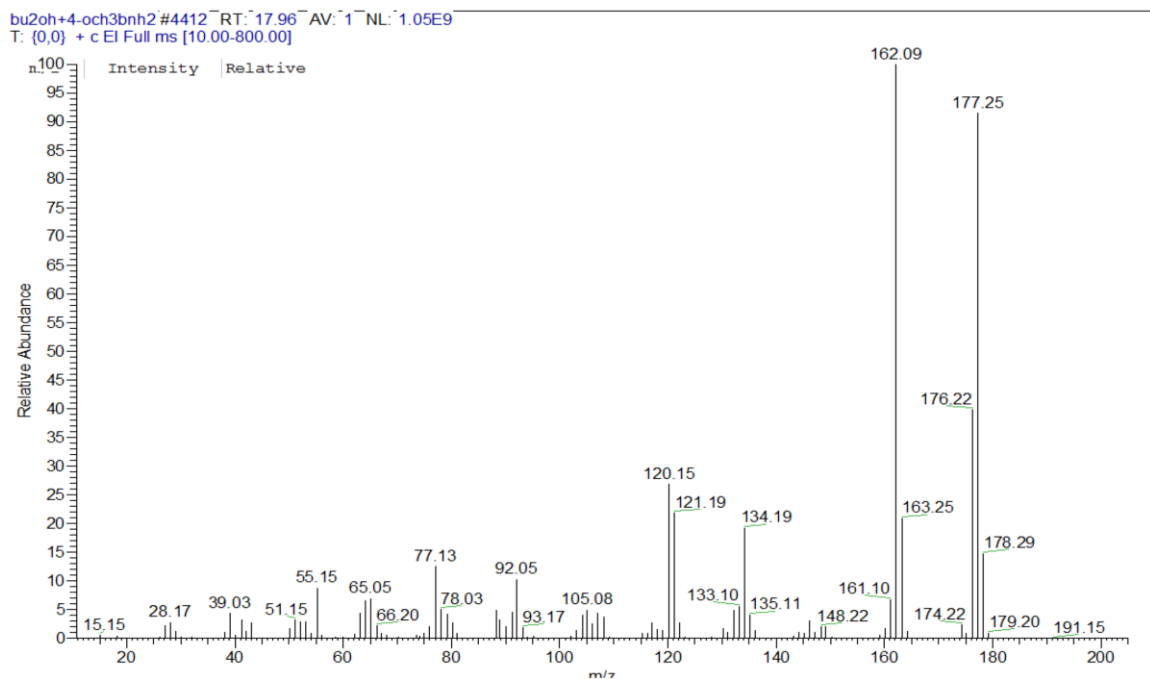

04-3, C-H#1-20 RT: 0.00-0.38 AV:20  
T: FTMS + p ESI Full ms [50.00-1000.00]  
m/z = 178.1922-178.3230

| Isotope | Min | Max |
|---------|-----|-----|
| C-12    | 0   | 11  |
| H-1     | 0   | 16  |
| N-14    | 0   | 1   |
| O-16    | 0   | 1   |

Charge 1

Mass tolerance 1000.00 ppm

Nitrogen rule not used

RDB equiv -1.00-100.00

Max results 1

| m/z      | Intensity  | Relative | Theo. Mass | Delta (ppm) | Composition                        |
|----------|------------|----------|------------|-------------|------------------------------------|
| 178.2485 | 44374400.0 | 100.00   | 178.2488   | -1.90       | C <sub>17</sub> H <sub>16</sub> ON |

**Figure S79.** Mass spectrum and HMS data of N-(4-methoxyphenyl) pyrrolidine

Iridium/Graphene Nanostructured Catalyst for the N-Alkylation of Amines to Synthesize Nitrogen-containing Derivatives and Heterocyclic Compounds in Green Process

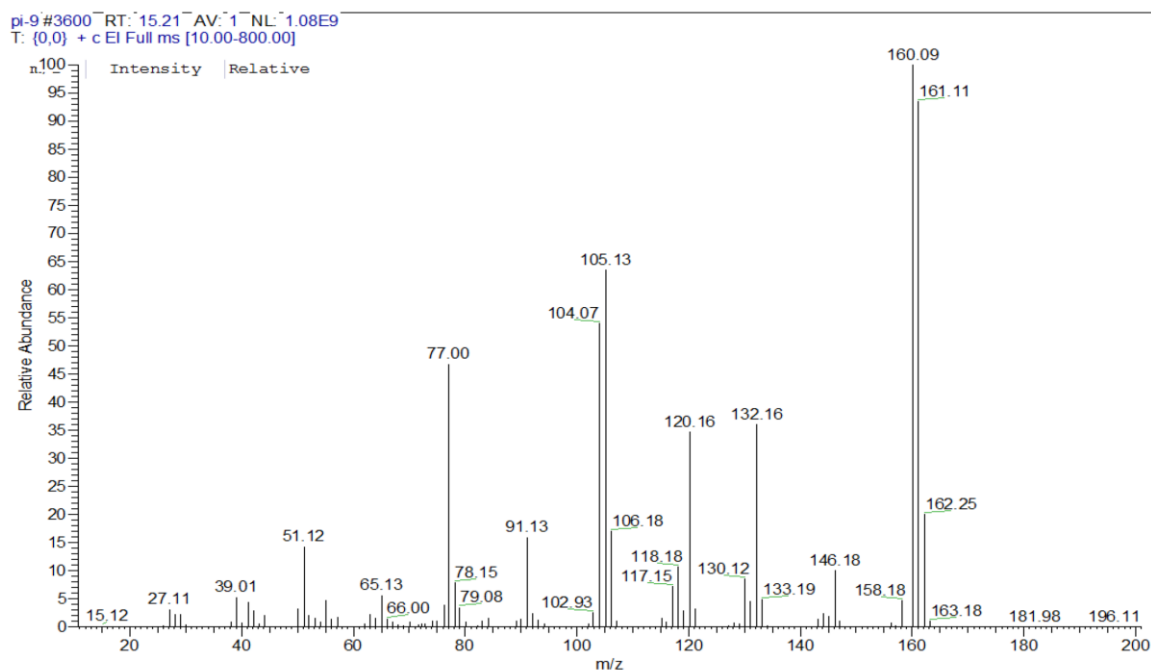

04-3, D-H#1-20 RT: 0.00-0.45 AV:20  
T: FTMS + p ESI Full ms [50.00-1000.00]  
m/z = 162.1932-162.3240

| Isotope | Min | Max |
|---------|-----|-----|
| C-12    | 0   | 11  |
| H-1     | 0   | 16  |
| N-14    | 0   | 1   |

Charge 1

Mass tolerance 1000.00 ppm

Nitrogen rule not used

RDB equiv -1.00-100.00

Max results 1

| m/z      | Intensity  | Relative | Theo. Mass | Delta (ppm) | Composition                       |
|----------|------------|----------|------------|-------------|-----------------------------------|
| 162.2495 | 40080103.0 | 100.00   | 162.2498   | -2.09       | C <sub>11</sub> H <sub>16</sub> N |

**Figure S80.** Mass spectrum and HMS data of N-phenylpiperidine

Iridium/Graphene Nanostructured Catalyst for the N-Alkylation of Amines to Synthesize Nitrogen-containing Derivatives and Heterocyclic Compounds in Green Process

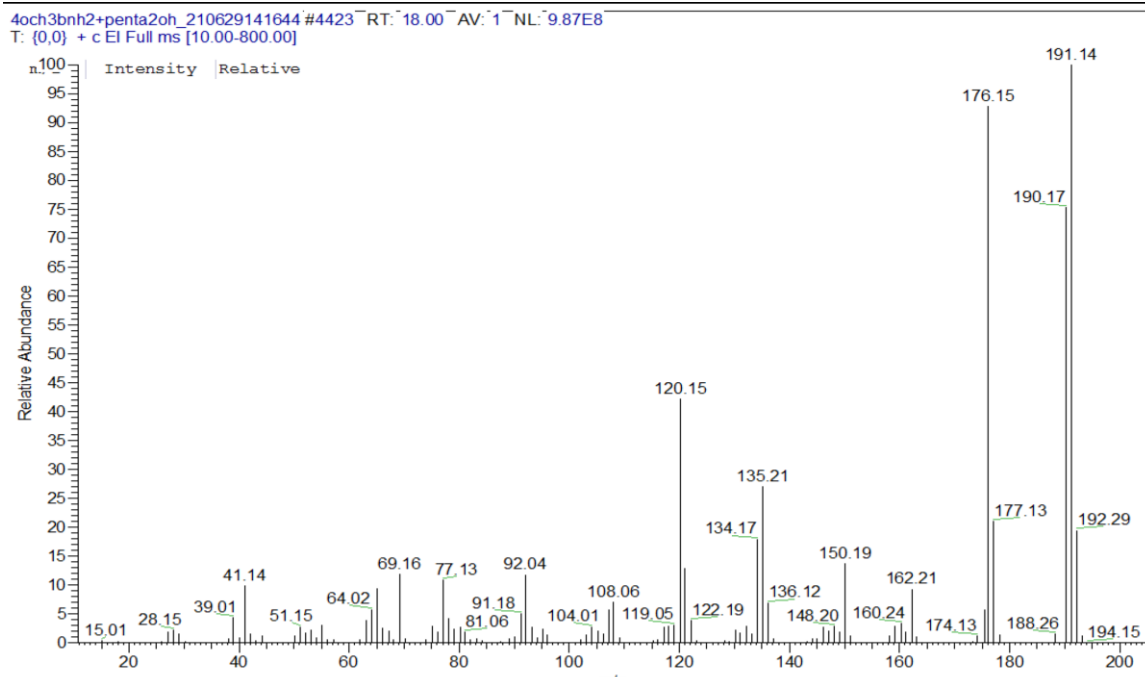

04-3, E-H#1-20 RT: 0.00-0.39 AV:20  
T: FTMS + p ESI Full ms [50.00-1000.00]  
m/z = 192.2186-192.3494

| Isotope | Min | Max |
|---------|-----|-----|
| C-12    | 0   | 12  |
| H-1     | 0   | 18  |
| N-14    | 0   | 1   |
| O-16    | 0   | 1   |

Charge 1

Mass tolerance 1000.00 ppm

Nitrogen rule not used

RDB equiv -1.00-100.00

Max results 1

| m/z      | Intensity  | Relative | Theo. Mass | Delta (ppm) | Composition                        |
|----------|------------|----------|------------|-------------|------------------------------------|
| 192.2753 | 38827600.0 | 100.00   | 192.2752   | 0.41        | C <sub>12</sub> H <sub>18</sub> ON |

**Figure S81.** Mass spectrum and HMS data of N-(4-methoxyphenyl) piperidine

p3-23 #3702 RT: 15.56 AV: 1 NL: 1.28E8  
T: (0,0) + c EI Full ms [10.00-800.00]

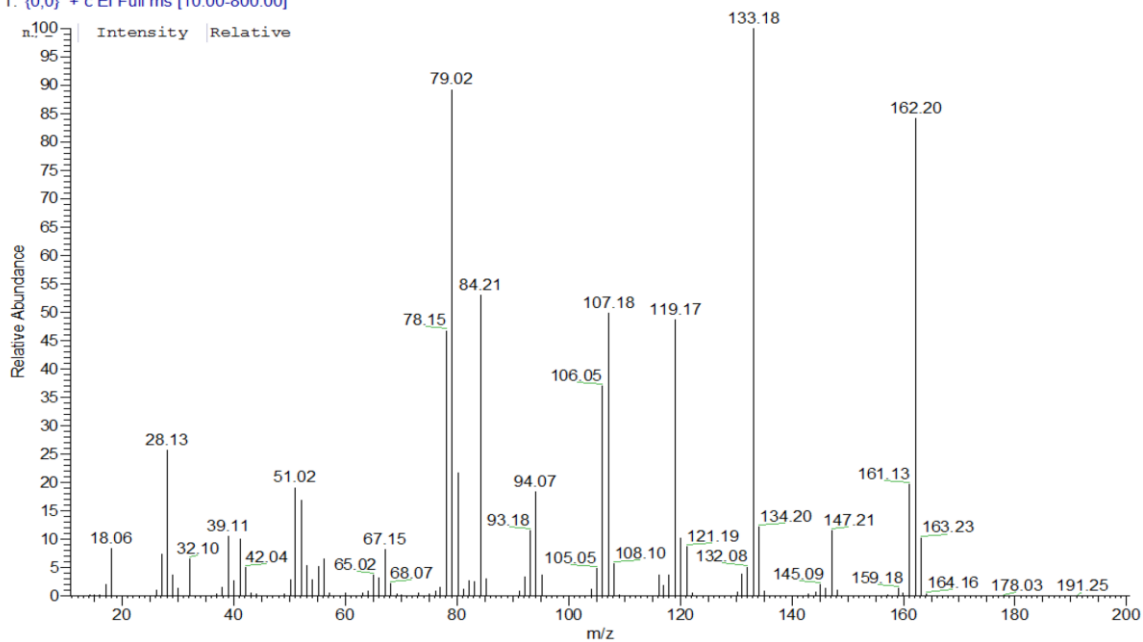

04-3, F-H#1-20 RT: 0.00-0.51 AV:20  
T: FTMS + p ESI Full ms [50.00-1000.00]  
m/z = 163.1814-163.3122

| Isotope | Min | Max |
|---------|-----|-----|
| C-12    | 0   | 10  |
| H-1     | 0   | 15  |
| N-14    | 0   | 2   |

Charge 1  
Mass tolerance 1000.00 ppm  
Nitrogen rule not used  
RDB equiv -1.00-100.00  
Max results 1

| m/z      | Intensity  | Relative | Theo. Mass | Delta (ppm) | Composition                                    |
|----------|------------|----------|------------|-------------|------------------------------------------------|
| 163.2381 | 37651006.0 | 100.00   | 163.2380   | 0.61        | C <sub>10</sub> H <sub>15</sub> N <sub>2</sub> |

**Figure S82.** Mass spectrum and HMS data of 1-( piperidine-1-yl) pyridine

Iridium/Graphene Nanostructured Catalyst for the N-Alkylation of Amines to Synthesize Nitrogen-containing Derivatives and Heterocyclic Compounds in Green Process

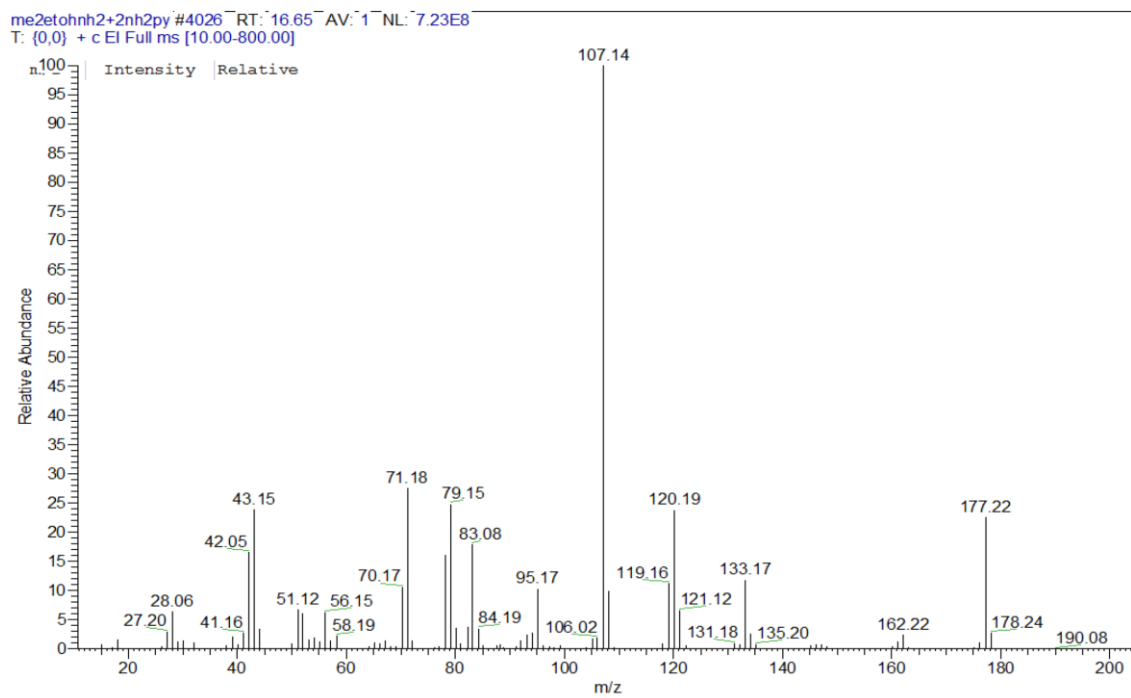

04-3, G-H#1-20 RT: 0.00-0.45 AV:20  
T: FTMS + p ESI Full ms [50.00-1000.00]  
m/z = 178.1959-178.3267

| Isotope | Min | Max |
|---------|-----|-----|
| C-12    | 0   | 10  |
| H-1     | 0   | 16  |
| N-14    | 0   | 3   |

Charge 1

Mass tolerance 1000.00 ppm

Nitrogen rule not used

RDB equiv -1.00-100.00

Max results 1

| m/z      | Intensity  | Relative | Theo. Mass | Delta (ppm) | Composition                                    |
|----------|------------|----------|------------|-------------|------------------------------------------------|
| 178.2522 | 47063757.0 | 100.00   | 178.2525   | -1.90       | C <sub>10</sub> H <sub>16</sub> N <sub>3</sub> |

**Figure S83.** Mass spectrum and HMS data of 1-methyl-4-(pyridin-2-yl) piperazine

Iridium/Graphene Nanostructured Catalyst for the N-Alkylation of Amines to Synthesize Nitrogen-containing Derivatives and Heterocyclic Compounds in Green Process

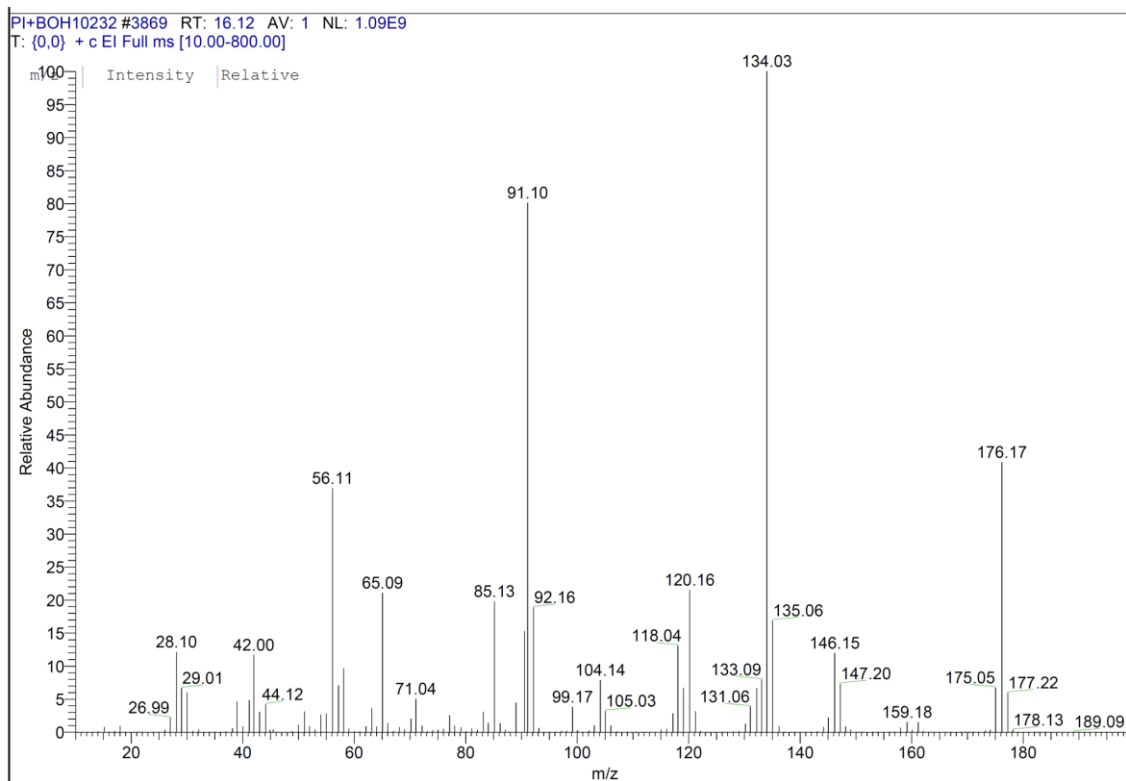

04-3, H+B-H#1-20 RT: 0.01-0.38 AV:20  
T: FTMS + p ESI Full ms [50.00-1000.00]  
m/z = 177.2078-177.3386

Isotope Min Max  
C-12 0 11  
H-1 0 17  
N-14 0 2

Charge 1  
Mass tolerance 1000.00 ppm  
Nitrogen rule not used  
RDB equiv -1.00-100.00  
Max results 1

| m/z      | Intensity  | Relative | Theo. Mass | Delta (ppm) | Composition                                    |
|----------|------------|----------|------------|-------------|------------------------------------------------|
| 177.2642 | 43749408.0 | 100.00   | 177.2644   | -1.01       | C <sub>11</sub> H <sub>17</sub> N <sub>2</sub> |

**Figure S84.** Mass spectrum and HMS data of benzylpiperazine



Iridium/Graphene Nanostructured Catalyst for the N-Alkylation of Amines to Synthesize Nitrogen-containing Derivatives and Heterocyclic Compounds in Green Process

chenhow11#3912 RT: 16.27 AV: 1 NL: 9.65E8  
T: (0.0) + c EI Full ms [10.00-800.00]

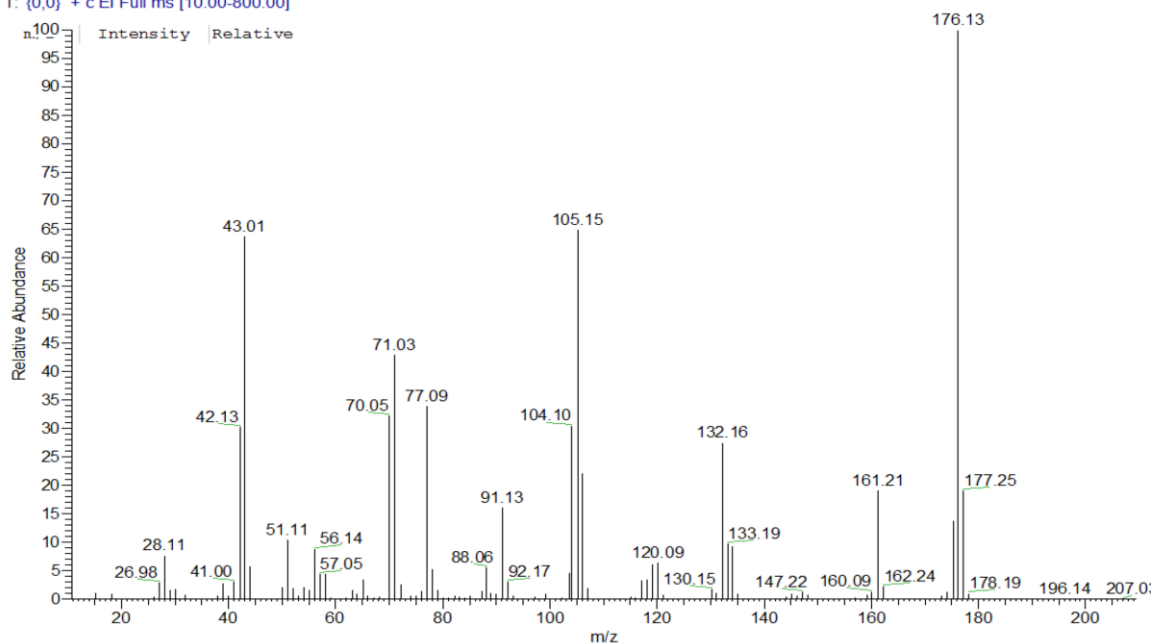

04-3, I-H#1-20 RT: 0.02-0.39 AV:20  
T: FTMS + p ESI Full ms [50.00-1000.00]  
m/z = 177.2138-177.3346

| Isotope | Min | Max |
|---------|-----|-----|
| C-12    | 0   | 11  |
| H-1     | 0   | 17  |
| N-14    | 0   | 2   |

Charge 1

Mass tolerance 1000.00 ppm

Nitrogen rule not used

RDB equiv -1.00-100.00

Max results 1

| m/z      | Intensity  | Relative | Theo. Mass | Delta (ppm) | Composition                                    |
|----------|------------|----------|------------|-------------|------------------------------------------------|
| 177.2646 | 45017507.0 | 100.00   | 177.2644   | 1.24        | C <sub>11</sub> H <sub>17</sub> N <sub>2</sub> |

**Figure S85.** Mass spectrum and HMS data of 1-methyl-4-phenyl piperazine

Iridium/Graphene Nanostructured Catalyst for the N-Alkylation of Amines to Synthesize Nitrogen-containing Derivatives and Heterocyclic Compounds in Green Process

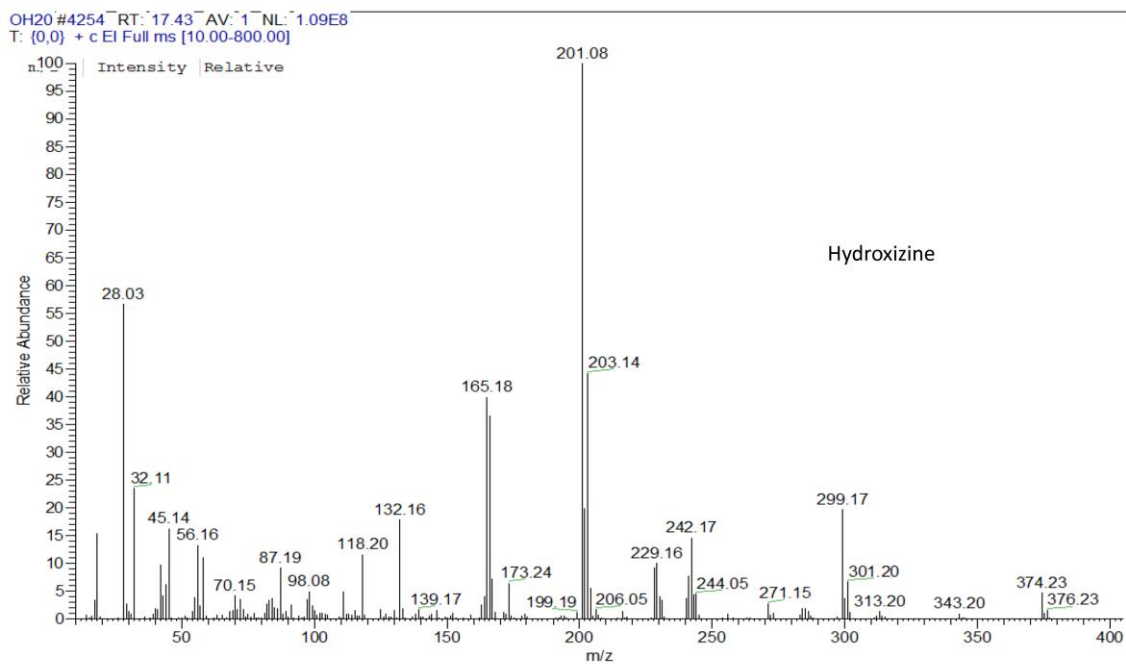

04-3, HY-H#1-20 RT: 0.02-0.55 AV:20  
T: FTMS + p ESI Full ms [50.00-1000.00]  
m/z = 375.8520-375.9828

| Isotope | Min | Max |
|---------|-----|-----|
| C-12    | 0   | 21  |
| H-1     | 0   | 28  |
| N-14    | 0   | 2   |
| O-16    | 0   | 2   |
| Cl-35   | 0   | 1   |

Charge 1

Mass tolerance 1000.00 ppm

Nitrogen rule not used

RDB equiv -1.00-100.00

Max results 1

| m/z      | Intensity  | Relative | Theo. Mass | Delta (ppm) | Composition                                                      |
|----------|------------|----------|------------|-------------|------------------------------------------------------------------|
| 375.9088 | 42785234.0 | 100.00   | 375.9086   | 0.48        | C <sub>21</sub> H <sub>28</sub> N <sub>2</sub> O <sub>2</sub> Cl |

**Figure S86.** Mass spectrum and HMS data of of hydroxyzine

Iridium/Graphene Nanostructured Catalyst for the N-Alkylation of Amines to Synthesize Nitrogen-containing Derivatives and Heterocyclic Compounds in Green Process

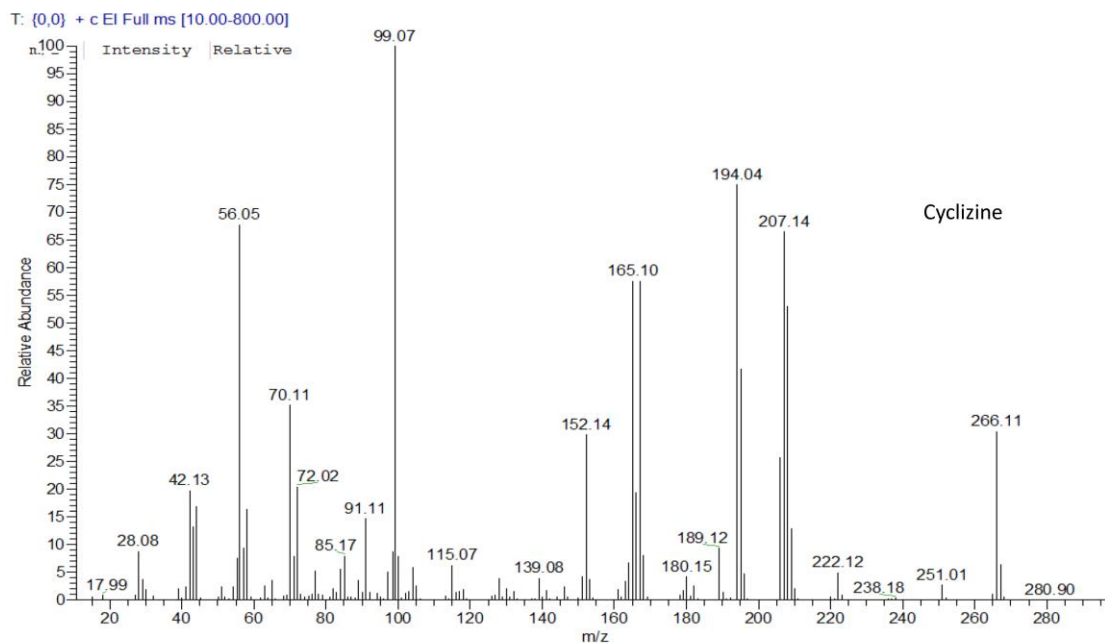

04-3, CY-H#1-20 RT: 0.02-0.50 AV:20

T: FTMS + p ESI Full ms [50.00-1000.00]

m/z = 267.3297-267.4605

Isotope Min Max

C-12 0 18

H-1 0 23

N-14 0 2

Charge 1

Mass tolerance 1000.00 ppm

Nitrogen rule not used

RDB equiv -1.00-100.00

Max results 1

| m/z      | Intensity  | Relative | Theo. Mass | Delta (ppm) | Composition                                    |
|----------|------------|----------|------------|-------------|------------------------------------------------|
| 267.3861 | 42261333.0 | 100.00   | 267.3863   | -0.82       | C <sub>18</sub> H <sub>23</sub> N <sub>2</sub> |

**Figure S87.** Mass spectrum and HMS data of cyclizine
